# Supplementary material for: Size-dependent electromagnetic wave absorption of 3C–SiC particles
Source: Royal Society of Chemistry journal article supplement (doi:10.1039/d4tc01070a), 2024-01-01
Supplement: d4tc01070a1.pdf [file d4tc01070a1.pdf]

## Size- dependent electromagnetic wave absorption of 3C-SiC particles

Hairui Zhao<sup>a</sup>, Jingxiang Liu<sup>a</sup>, Wentao Liu<sup>b</sup>, Zongyi Shao<sup>b</sup>, Zhijiang Wang<sup>a,c,\*</sup>

### Materials

The synthesis process of SiC<sub>06</sub> is provided in our previously published work (J. Phys. Chem. C, 2018, 122, 18537–18544; Carbon, 2023, 213, 118253; Carbon, 2024, 218, 118727). The powder synthesis employs a modified carbothermal reduction reaction. First, carbon nanoparticles, silicon powder, and silicon dioxide powder are mixed in a 4:1:1 molar ratio and heated to 1500°C under an argon atmosphere, holding for 2 hours. After cooling to room temperature, the obtained powder is treated at 700°C in an air environment for 2 hours to remove any unreacted carbon nanoparticles, ultimately yielding the nanoparticle powder. The primary reaction that occurs during this process are:

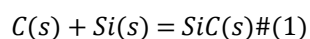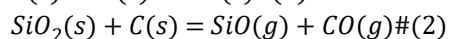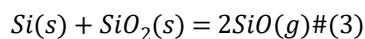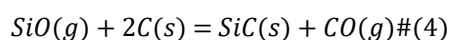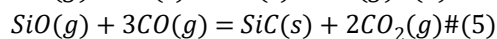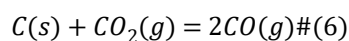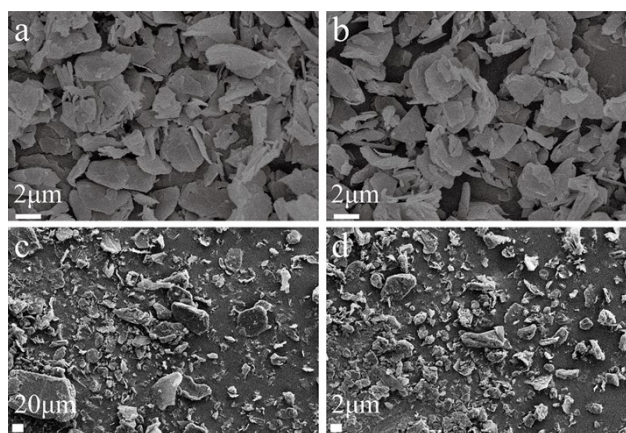

Fig. S 1 SEM of graphite powder. (a), (b): 1.6 μm; (c), (d): 36 μm.

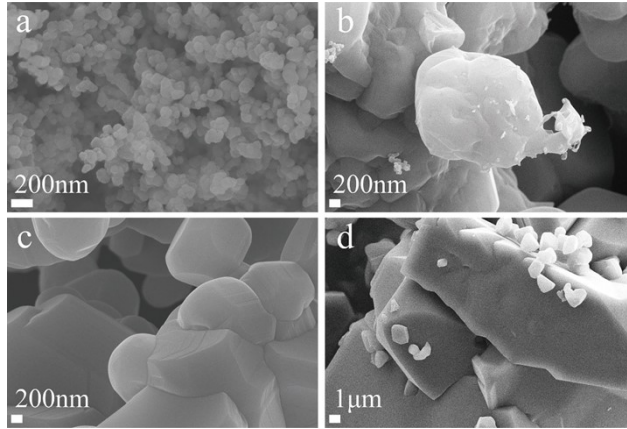

Fig. S 2 SEM images of samples. (a)  $\text{SiC}_{06}$ , (b)  $\text{SiC}_1$ , (c)  $\text{SiC}_3$ , and (d)  $\text{SiC}_5$ .

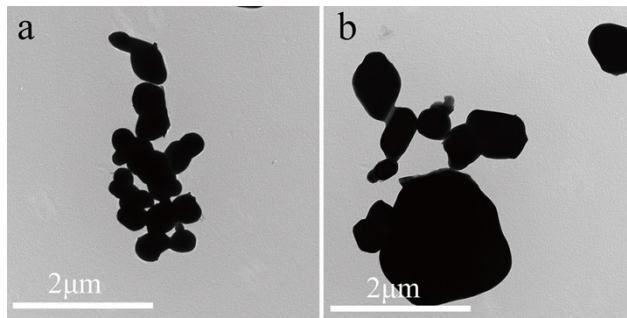

Fig. S 3 TEM images. (a)  $\text{SiC}_3$ , (b)  $\text{SiC}_5$ .

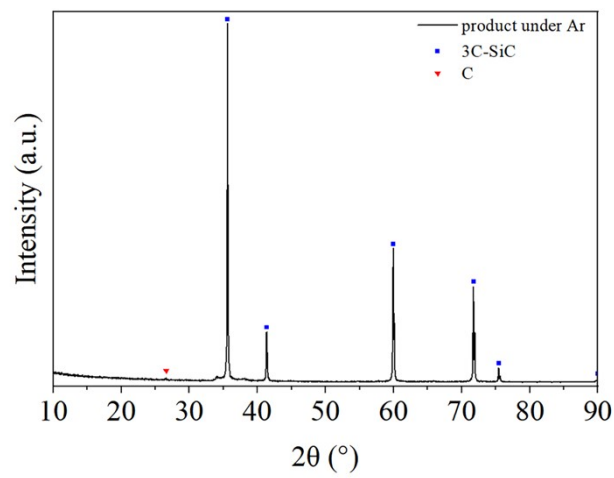

Fig. S 4 XRD of products obtained under Ar

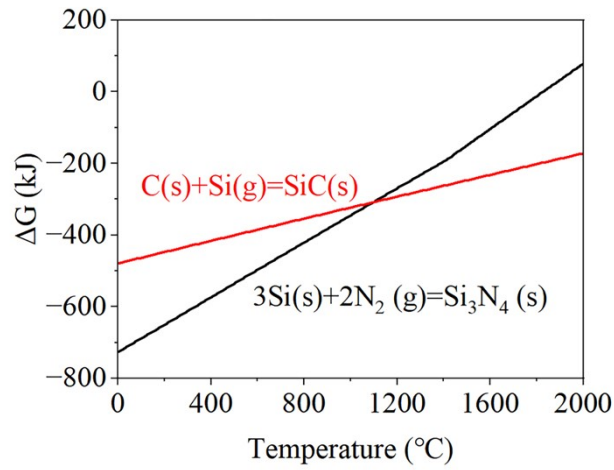

Fig. S 5 Thermodynamic calculation of reaction

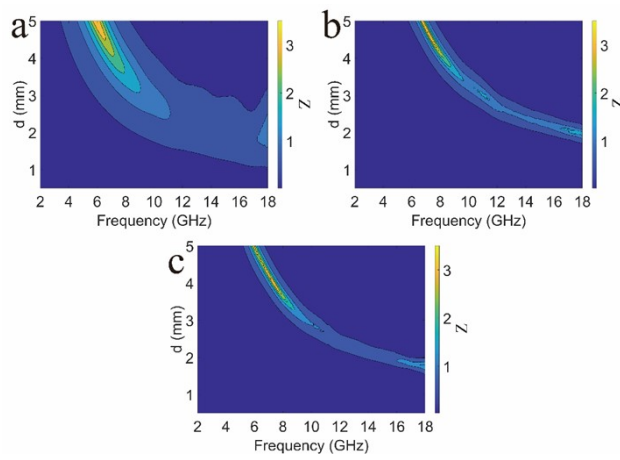

Fig. S 6 Impedance matching of (a)  $\text{SiC}_1$ , (b)  $\text{SiC}_3$  and (c)  $\text{SiC}_5$ .
