# Supplementary material for: Size-dependent electromagnetic wave absorption of 3C–SiC particles
Source: Royal Society of Chemistry journal article supplement (doi:10.1039/d4tc01070a), 2024-01-01
Supplement: d4tc01070a2.xlsx [file d4tc01070a2.xlsx]

## Sheet: Fig2(a)
Particle size	Volume fraction	Volume fraction	Volume fraction	Volume fraction
um	%	%	%	%
	SiC06	SiC1	SiC3	SiC5
0.015	0	0	0	0
0.017	0	0	0	0
0.019	0	0	0	0
0.022	0.12	0	0	0
0.025	0.49	0	0	0
0.028	1.24	0	0	0
0.032	3.09	0	0	0
0.036	6.1	0	0	0
0.04	10.33	0	0	0
0.046	18.64	0	0	0
0.052	28.5	0	0	0
0.059	40.04	0	0	0
0.066	52.16	0	0	0
0.075	64.95	0	0	0
0.085	75.88	0	0	0
0.096	84.23	0	0	0
0.109	90.38	0	0	0
0.123	94.08	0	0	0
0.139	96.24	0.18	0	0
0.158	97.5	0.71	0	0
0.179	98.22	0.89	0.06	0
0.202	98.73	1.42	0.25	0
0.229	99.15	1.6	0.66	0
0.259	99.47	2.13	1.3	0
0.293	99.68	2.83	2.15	0
0.332	99.8	3.71	3.18	0
0.376	99.89	4.79	4.3	0
0.425	99.95	6.17	5.49	0
0.481	99.98	8.27	6.78	0
0.545	100	10.3	8.19	0
0.617	100	13	9.71	0
0.698	100	15.98	11.35	0
0.79	100	20.53	13.14	0.09
0.894	100	26.48	15.08	0.27
1.012	100	33.66	17.2	0.54
1.146	100	41.02	19.5	0.83
1.297	100	49.78	21.99	1.19
1.468	100	58.89	24.69	1.73
1.662	100	67.82	27.63	2.45
1.881	100	71.8	30.82	3.99
2.129	100	74.78	34.29	5.62
2.41	100	78.46	38.08	8.24
2.728	100	81.14	42.22	12.95
3.087	100	84.82	46.73	18.74
3.494	100	88.15	51.64	24.71
3.955	100	89.73	56.93	31.67
4.477	100	91.83	62.54	40.45
5.067	100	94.46	68.36	47.49
5.736	100	96.04	74.24	53.83
6.492	100	97.62	79.93	59.8
7.348	100	98.32	85.18	65.41
8.318	100	99.55	89.74	70.93
9.415	100	99.73	93.42	76.18
10.656	100	99.91	96.15	81.07
12.062	100	100	97.99	84.96
13.652	100	100	99.09	88.76
15.453	100	100	99.66	92.2
17.491	100	100	99.91	94.64
19.798	100	100	100	97.35
22.409	100	100	100	98.07
25.364	100	100	100	98.61
28.709	100	100	100	99.15
32.495	100	100	100	99.15
36.781	100	100	100	99.15
41.632	100	100	100	99.6
47.123	100	100	100	99.78
53.337	100	100	100	99.91
60.372	100	100	100	100
68.334	100	100	100	100
77.346	100	100	100	100
87.547	100	100	100	100
99.093	100	100	100	100
112.161	100	100	100	100
126.954	100	100	100	100
143.697	100	100	100	100
162.648	100	100	100	100
184.099	100	100	100	100
208.379	100	100	100	100
235.861	100	100	100	100
266.967	100	100	100	100
302.176	100	100	100	100
342.029	100	100	100	100
387.137	100	100	100	100
438.194	100	100	100	100
495.985	100	100	100	100
561.398	100	100	100	100
635.438	100	100	100	100
719.242	100	100	100	100
814.099	100	100	100	100
921.466	100	100	100	100
1042.99	100	100	100	100
1180.55	100	100	100	100
1336.24	100	100	100	100
1512.47	100	100	100	100
1937.72	100	100	100	100
2193.28	100	100	100	100
2482.54	100	100	100	100
2809.95	100	100	100	100
3180.54	100	100	100	100
3600	100	100	100	100

## Sheet: Fig2(b)
2θ	Intensity	Intensity	Intensity	Intensity
°	a.u.	a.u.	a.u.	a.u.
SiC06	SiC06	SiC1	SiC3	SiC5
10.0221	85	474.882	913.182	1341.31
10.0423	85	492.882	946.182	1339.31
10.0625	77	505.882	920.182	1344.31
10.0828	80	482.882	913.182	1337.31
10.103	105	489.882	913.182	1354.31
10.1232	129	493.882	936.182	1343.31
10.1435	69	465.882	922.182	1346.31
10.1637	79	483.882	920.182	1342.31
10.1839	107	483.882	921.182	1348.31
10.2042	97	476.882	945.182	1333.31
10.2244	100	487.882	921.182	1345.31
10.2446	99	504.882	924.182	1353.31
10.2648	92	472.882	936.182	1334.31
10.2851	75	487.882	924.182	1354.31
10.3053	79	490.882	930.182	1346.31
10.3255	78	482.882	922.182	1340.31
10.3458	75	476.882	910.182	1325.31
10.366	86	480.882	931.182	1343.31
10.3862	79	489.882	912.182	1349.31
10.4064	72	471.882	922.182	1336.31
10.4267	93	494.882	929.182	1312.31
10.4469	97	491.882	927.182	1336.31
10.4671	98	457.882	939.182	1335.31
10.4874	79	486.882	915.182	1337.31
10.5076	96	474.882	928.182	1328.31
10.5278	82	480.882	912.182	1341.31
10.5481	98	489.882	912.182	1348.31
10.5683	82	473.882	905.182	1337.31
10.5885	91	484.882	926.182	1315.31
10.6087	102	483.882	921.182	1341.31
10.629	91	473.882	933.182	1332.31
10.6492	97	457.882	937.182	1337.31
10.6694	93	494.882	946.182	1328.31
10.6897	83	481.882	913.182	1336.31
10.7099	102	486.882	919.182	1313.31
10.7301	91	472.882	919.182	1328.31
10.7503	78	465.882	902.182	1325.31
10.7706	94	496.882	920.182	1341.31
10.7908	77	483.882	922.182	1361.31
10.811	65	473.882	938.182	1348.31
10.8313	86	475.882	912.182	1341.31
10.8515	73	477.882	922.182	1344.31
10.8717	83	472.882	917.182	1337.31
10.892	104	477.882	909.182	1333.31
10.9122	71	456.882	902.182	1334.31
10.9324	92	467.882	925.182	1343.31
10.9526	99	474.882	943.182	1334.31
10.9729	90	485.882	913.182	1326.31
10.9931	84	485.882	925.182	1317.31
11.0133	83	474.882	917.182	1321.31
11.0336	80	455.882	907.182	1328.31
11.0538	89	456.882	897.182	1341.31
11.074	74	453.882	913.182	1349.31
11.0942	73	492.882	932.182	1325.31
11.1145	76	470.882	914.182	1329.31
11.1347	66	470.882	937.182	1313.31
11.1549	84	466.882	919.182	1329.31
11.1752	64	462.882	925.182	1331.31
11.1954	91	450.882	917.182	1338.31
11.2156	81	471.882	916.182	1327.31
11.2359	58	475.882	908.182	1305.31
11.2561	69	449.882	920.182	1343.31
11.2763	85	460.882	904.182	1323.31
11.2965	93	475.882	923.182	1296.31
11.3168	67	469.882	913.182	1333.31
11.337	83	472.882	915.182	1330.31
11.3572	93	461.882	917.182	1316.31
11.3775	69	476.882	920.182	1331.31
11.3977	92	460.882	907.182	1331.31
11.4179	104	468.882	917.182	1326.31
11.4381	97	468.882	907.182	1336.31
11.4584	85	471.882	907.182	1340.31
11.4786	83	491.882	906.182	1321.31
11.4988	86	482.882	914.182	1331.31
11.5191	93	462.882	921.182	1333.31
11.5393	56	467.882	902.182	1295.31
11.5595	83	453.882	908.182	1315.31
11.5798	97	448.882	916.182	1324.31
11.6	82	471.882	929.182	1326.31
11.6202	78	469.882	900.182	1314.31
11.6404	83	446.882	907.182	1310.31
11.6607	88	469.882	920.182	1316.31
11.6809	79	473.882	918.182	1333.31
11.7011	77	454.882	915.182	1330.31
11.7214	74	451.882	907.182	1313.31
11.7416	86	464.882	905.182	1334.31
11.7618	73	460.882	932.182	1334.31
11.782	73	459.882	911.182	1315.31
11.8023	91	449.882	896.182	1305.31
11.8225	81	457.882	905.182	1327.31
11.8427	79	462.882	905.182	1327.31
11.863	77	480.882	903.182	1316.31
11.8832	69	470.882	918.182	1321.31
11.9034	59	466.882	904.182	1317.31
11.9237	69	460.882	912.182	1311.31
11.9439	76	451.882	918.182	1327.31
11.9641	88	471.882	912.182	1318.31
11.9843	76	466.882	903.182	1314.31
12.0046	74	442.882	914.182	1311.31
12.0248	81	454.882	928.182	1302.31
12.045	78	480.882	903.182	1322.31
12.0653	62	447.882	909.182	1308.31
12.0855	81	458.882	921.182	1322.31
12.1057	65	471.882	909.182	1319.31
12.1259	85	454.882	900.182	1327.31
12.1462	82	450.882	899.182	1336.31
12.1664	76	468.882	924.182	1309.31
12.1866	80	461.882	891.182	1312.31
12.2069	85	445.882	909.182	1336.31
12.2271	82	459.882	909.182	1302.31
12.2473	81	451.882	918.182	1300.31
12.2676	72	462.882	891.182	1318.31
12.2878	88	458.882	911.182	1310.31
12.308	83	453.882	905.182	1320.31
12.3282	85	476.882	899.182	1327.31
12.3485	71	452.882	903.182	1314.31
12.3687	60	462.882	920.182	1317.31
12.3889	71	460.882	915.182	1314.31
12.4092	70	447.882	914.182	1306.31
12.4294	81	464.882	914.182	1321.31
12.4496	62	447.882	896.182	1294.31
12.4698	76	452.882	896.182	1329.31
12.4901	60	465.882	893.182	1330.31
12.5103	50	459.882	901.182	1309.31
12.5305	71	458.882	922.182	1309.31
12.5508	60	445.882	913.182	1315.31
12.571	84	440.882	888.182	1320.31
12.5912	78	448.882	893.182	1311.31
12.6115	67	457.882	897.182	1319.31
12.6317	58	447.882	913.182	1304.31
12.6519	85	458.882	907.182	1315.31
12.6721	77	453.882	907.182	1321.31
12.6924	70	446.882	909.182	1309.31
12.7126	74	437.882	886.182	1311.31
12.7328	79	448.882	886.182	1326.31
12.7531	82	450.882	901.182	1313.31
12.7733	74	435.882	900.182	1304.31
12.7935	78	436.882	909.182	1304.31
12.8137	88	449.882	892.182	1305.31
12.834	69	451.882	912.182	1306.31
12.8542	78	459.882	896.182	1311.31
12.8744	69	452.882	913.182	1314.31
12.8947	78	465.882	898.182	1313.31
12.9149	81	436.882	889.182	1313.31
12.9351	70	441.882	890.182	1293.31
12.9554	63	456.882	900.182	1308.31
12.9756	73	453.882	913.182	1311.31
12.9958	65	446.882	901.182	1313.31
13.016	76	439.882	890.182	1301.31
13.0363	89	434.882	892.182	1324.31
13.0565	86	463.882	895.182	1315.31
13.0767	56	430.882	906.182	1313.31
13.097	71	445.882	898.182	1322.31
13.1172	67	452.882	903.182	1306.31
13.1374	77	438.882	903.182	1312.31
13.1576	73	456.882	886.182	1312.31
13.1779	61	432.882	893.182	1317.31
13.1981	71	429.882	920.182	1320.31
13.2183	70	437.882	903.182	1311.31
13.2386	74	453.882	899.182	1318.31
13.2588	51	450.882	903.182	1300.31
13.279	75	431.882	912.182	1300.31
13.2993	63	446.882	907.182	1304.31
13.3195	81	454.882	909.182	1289.31
13.3397	64	456.882	901.182	1319.31
13.3599	55	451.882	891.182	1313.31
13.3802	66	437.882	905.182	1310.31
13.4004	80	441.882	903.182	1310.31
13.4206	61	432.882	889.182	1287.31
13.4409	47	439.882	887.182	1308.31
13.4611	64	458.882	907.182	1303.31
13.4813	74	434.882	915.182	1323.31
13.5015	68	457.882	906.182	1312.31
13.5218	62	447.882	907.182	1296.31
13.542	56	452.882	897.182	1314.31
13.5622	70	452.882	903.182	1316.31
13.5825	56	449.882	896.182	1307.31
13.6027	65	452.882	907.182	1302.31
13.6229	56	438.882	878.182	1301.31
13.6432	65	437.882	894.182	1299.31
13.6634	65	453.882	893.182	1298.31
13.6836	68	443.882	906.182	1306.31
13.7038	65	450.882	897.182	1295.31
13.7241	66	466.882	906.182	1344.31
13.7443	66	452.882	904.182	1304.31
13.7645	65	443.882	895.182	1303.31
13.7848	60	431.882	904.182	1304.31
13.805	50	434.882	905.182	1302.31
13.8252	66	435.882	900.182	1299.31
13.8454	59	434.882	912.182	1307.31
13.8657	85	444.882	885.182	1297.31
13.8859	67	434.882	887.182	1310.31
13.9061	56	442.882	894.182	1306.31
13.9264	67	464.882	891.182	1285.31
13.9466	68	443.882	895.182	1302.31
13.9668	74	441.882	911.182	1297.31
13.9871	55	433.882	890.182	1293.31
14.0073	67	431.882	897.182	1300.31
14.0275	73	434.882	894.182	1303.31
14.0477	72	438.882	895.182	1317.31
14.068	62	435.882	894.182	1306.31
14.0882	64	452.882	890.182	1285.31
14.1084	79	435.882	887.182	1285.31
14.1287	63	448.882	902.182	1316.31
14.1489	73	445.882	903.182	1316.31
14.1691	64	435.882	885.182	1292.31
14.1893	68	437.882	899.182	1306.31
14.2096	75	440.882	903.182	1303.31
14.2298	64	426.882	894.182	1310.31
14.25	63	434.882	895.182	1299.31
14.2703	55	440.882	892.182	1298.31
14.2905	76	453.882	894.182	1287.31
14.3107	63	431.882	891.182	1298.31
14.331	78	446.882	886.182	1307.31
14.3512	85	429.882	887.182	1291.31
14.3714	52	451.882	911.182	1283.31
14.3916	66	433.882	884.182	1299.31
14.4119	74	437.882	908.182	1295.31
14.4321	77	423.882	886.182	1306.31
14.4523	58	449.882	898.182	1282.31
14.4726	53	443.882	880.182	1293.31
14.4928	76	434.882	891.182	1298.31
14.513	55	444.882	909.182	1305.31
14.5332	86	446.882	899.182	1302.31
14.5535	63	452.882	892.182	1314.31
14.5737	77	432.882	874.182	1300.31
14.5939	89	454.882	897.182	1300.31
14.6142	64	431.882	892.182	1310.31
14.6344	47	442.882	882.182	1283.31
14.6546	65	437.882	889.182	1299.31
14.6749	50	432.882	888.182	1303.31
14.6951	64	442.882	880.182	1307.31
14.7153	69	438.882	898.182	1294.31
14.7355	66	433.882	898.182	1296.31
14.7558	66	432.882	879.182	1298.31
14.776	48	427.882	886.182	1312.31
14.7962	59	424.882	881.182	1307.31
14.8165	37	442.882	894.182	1323.31
14.8367	77	443.882	887.182	1296.31
14.8569	59	420.882	887.182	1301.31
14.8771	57	452.882	882.182	1298.31
14.8974	77	440.882	882.182	1287.31
14.9176	56	422.882	887.182	1304.31
14.9378	72	427.882	889.182	1299.31
14.9581	49	444.882	879.182	1295.31
14.9783	68	439.882	899.182	1301.31
14.9985	77	446.882	898.182	1316.31
15.0188	71	436.882	895.182	1313.31
15.039	72	417.882	900.182	1300.31
15.0592	65	433.882	888.182	1300.31
15.0794	55	464.882	875.182	1308.31
15.0997	61	434.882	890.182	1288.31
15.1199	54	439.882	892.182	1293.31
15.1401	46	436.882	886.182	1293.31
15.1604	56	437.882	883.182	1290.31
15.1806	52	438.882	893.182	1284.31
15.2008	50	453.882	881.182	1309.31
15.221	64	445.882	888.182	1292.31
15.2413	61	437.882	888.182	1298.31
15.2615	56	434.882	887.182	1292.31
15.2817	59	453.882	887.182	1286.31
15.302	67	432.882	906.182	1305.31
15.3222	63	430.882	894.182	1292.31
15.3424	50	440.882	890.182	1307.31
15.3627	56	423.882	888.182	1298.31
15.3829	73	423.882	904.182	1293.31
15.4031	56	437.882	884.182	1300.31
15.4233	65	424.882	883.182	1290.31
15.4436	52	421.882	882.182	1306.31
15.4638	50	436.882	893.182	1274.31
15.484	61	426.882	884.182	1295.31
15.5043	76	441.882	897.182	1291.31
15.5245	65	431.882	872.182	1283.31
15.5447	62	429.882	893.182	1314.31
15.5649	61	424.882	887.182	1295.31
15.5852	57	432.882	873.182	1301.31
15.6054	54	432.882	883.182	1300.31
15.6256	53	437.882	895.182	1292.31
15.6459	53	439.882	882.182	1288.31
15.6661	60	417.882	879.182	1290.31
15.6863	62	420.882	878.182	1282.31
15.7066	52	436.882	872.182	1301.31
15.7268	72	424.882	879.182	1295.31
15.747	47	428.882	892.182	1289.31
15.7672	63	430.882	882.182	1288.31
15.7875	57	424.882	889.182	1297.31
15.8077	71	417.882	880.182	1294.31
15.8279	46	432.882	880.182	1300.31
15.8482	62	422.882	879.182	1287.31
15.8684	54	417.882	890.182	1284.31
15.8886	58	431.882	883.182	1283.31
15.9088	44	431.882	883.182	1305.31
15.9291	67	437.882	874.182	1283.31
15.9493	71	429.882	887.182	1292.31
15.9695	58	433.882	871.182	1300.31
15.9898	61	438.882	885.182	1285.31
16.01	62	446.882	890.182	1295.31
16.0302	62	427.882	875.182	1283.31
16.0505	68	433.882	886.182	1295.31
16.0707	58	421.882	885.182	1275.31
16.0909	60	437.882	889.182	1296.31
16.1111	62	427.882	878.182	1282.31
16.1314	54	441.882	894.182	1311.31
16.1516	62	438.882	874.182	1293.31
16.1718	60	430.882	883.182	1293.31
16.1921	59	429.882	892.182	1276.31
16.2123	59	433.882	881.182	1286.31
16.2325	74	429.882	878.182	1283.31
16.2527	49	424.882	897.182	1289.31
16.273	59	438.882	878.182	1288.31
16.2932	71	418.882	875.182	1288.31
16.3134	60	445.882	887.182	1284.31
16.3337	50	441.882	891.182	1291.31
16.3539	50	425.882	891.182	1292.31
16.3741	73	418.882	888.182	1302.31
16.3944	65	430.882	895.182	1296.31
16.4146	59	430.882	886.182	1289.31
16.4348	65	428.882	887.182	1286.31
16.455	64	426.882	887.182	1282.31
16.4753	53	446.882	878.182	1284.31
16.4955	49	428.882	882.182	1277.31
16.5157	62	436.882	884.182	1294.31
16.536	49	430.882	880.182	1281.31
16.5562	56	430.882	882.182	1280.31
16.5764	69	420.882	878.182	1279.31
16.5966	70	422.882	876.182	1289.31
16.6169	49	432.882	878.182	1286.31
16.6371	62	416.882	879.182	1282.31
16.6573	54	423.882	888.182	1293.31
16.6776	68	428.882	873.182	1275.31
16.6978	58	428.882	873.182	1291.31
16.718	63	423.882	877.182	1308.31
16.7383	63	418.882	886.182	1288.31
16.7585	55	416.882	895.182	1287.31
16.7787	67	439.882	880.182	1272.31
16.7989	64	423.882	879.182	1287.31
16.8192	74	429.882	880.182	1288.31
16.8394	66	424.882	871.182	1298.31
16.8596	63	433.882	876.182	1313.31
16.8799	62	429.882	872.182	1278.31
16.9001	70	417.882	870.182	1287.31
16.9203	62	434.882	874.182	1284.31
16.9405	58	437.882	887.182	1279.31
16.9608	55	428.882	886.182	1283.31
16.981	58	436.882	885.182	1281.31
17.0012	70	441.882	893.182	1293.31
17.0215	63	425.882	888.182	1282.31
17.0417	57	427.882	875.182	1296.31
17.0619	72	451.882	878.182	1291.31
17.0822	68	419.882	872.182	1273.31
17.1024	64	425.882	881.182	1282.31
17.1226	59	419.882	871.182	1282.31
17.1428	70	404.882	877.182	1282.31
17.1631	56	434.882	887.182	1303.31
17.1833	68	418.882	880.182	1293.31
17.2035	80	412.882	870.182	1296.31
17.2238	62	412.882	887.182	1283.31
17.244	46	420.882	872.182	1285.31
17.2642	57	426.882	882.182	1282.31
17.2844	47	430.882	881.182	1284.31
17.3047	56	428.882	872.182	1282.31
17.3249	66	416.882	857.182	1272.31
17.3451	83	420.882	876.182	1301.31
17.3654	61	409.882	871.182	1283.31
17.3856	66	418.882	884.182	1291.31
17.4058	70	421.882	888.182	1290.31
17.4261	53	407.882	867.182	1275.31
17.4463	61	430.882	870.182	1277.31
17.4665	54	429.882	882.182	1281.31
17.4867	54	420.882	876.182	1280.31
17.507	60	408.882	881.182	1293.31
17.5272	73	420.882	875.182	1280.31
17.5474	57	426.882	880.182	1285.31
17.5677	68	424.882	885.182	1268.31
17.5879	58	419.882	880.182	1298.31
17.6081	67	410.882	872.182	1277.31
17.6283	72	418.882	882.182	1285.31
17.6486	72	432.882	874.182	1283.31
17.6688	62	417.882	873.182	1281.31
17.689	53	433.882	876.182	1298.31
17.7093	65	428.882	879.182	1278.31
17.7295	54	437.882	880.182	1284.31
17.7497	75	426.882	871.182	1275.31
17.77	50	421.882	879.182	1285.31
17.7902	65	420.882	884.182	1278.31
17.8104	75	426.882	879.182	1281.31
17.8306	67	428.882	874.182	1273.31
17.8509	57	422.882	881.182	1277.31
17.8711	68	405.882	884.182	1288.31
17.8913	69	429.882	880.182	1275.31
17.9116	59	428.882	877.182	1270.31
17.9318	68	426.882	886.182	1277.31
17.952	72	417.882	879.182	1285.31
17.9722	71	433.882	873.182	1302.31
17.9925	56	417.882	874.182	1292.31
18.0127	64	419.882	875.182	1278.31
18.0329	59	414.882	878.182	1276.31
18.0532	56	435.882	865.182	1282.31
18.0734	70	423.882	879.182	1283.31
18.0936	59	420.882	866.182	1275.31
18.1139	61	418.882	887.182	1280.31
18.1341	66	406.882	866.182	1290.31
18.1543	66	434.882	888.182	1288.31
18.1745	69	408.882	870.182	1286.31
18.1948	63	410.882	877.182	1279.31
18.215	68	416.882	875.182	1293.31
18.2352	56	410.882	881.182	1288.31
18.2555	57	423.882	860.182	1273.31
18.2757	59	411.882	875.182	1278.31
18.2959	70	412.882	881.182	1274.31
18.3161	58	422.882	875.182	1278.31
18.3364	45	425.882	883.182	1264.31
18.3566	59	424.882	877.182	1284.31
18.3768	72	411.882	873.182	1291.31
18.3971	58	424.882	863.182	1288.31
18.4173	58	415.882	876.182	1289.31
18.4375	69	424.882	881.182	1279.31
18.4578	66	409.882	868.182	1280.31
18.478	64	399.882	879.182	1277.31
18.4982	57	424.882	874.182	1276.31
18.5184	74	425.882	875.182	1281.31
18.5387	57	415.882	877.182	1269.31
18.5589	72	412.882	866.182	1275.31
18.5791	64	410.882	886.182	1279.31
18.5994	69	425.882	875.182	1289.31
18.6196	71	422.882	874.182	1265.31
18.6398	57	413.882	874.182	1271.31
18.66	70	428.882	867.182	1290.31
18.6803	80	412.882	863.182	1291.31
18.7005	69	424.882	876.182	1273.31
18.7207	61	423.882	868.182	1272.31
18.741	63	417.882	881.182	1273.31
18.7612	52	402.882	878.182	1273.31
18.7814	66	422.882	874.182	1263.31
18.8017	61	417.882	883.182	1274.31
18.8219	66	419.882	874.182	1270.31
18.8421	58	423.882	866.182	1279.31
18.8623	52	419.882	878.182	1279.31
18.8826	75	426.882	882.182	1280.31
18.9028	51	412.882	884.182	1304.31
18.923	49	412.882	884.182	1268.31
18.9433	51	412.882	876.182	1276.31
18.9635	59	406.882	876.182	1283.31
18.9837	75	418.882	874.182	1275.31
19.0039	74	414.882	873.182	1283.31
19.0242	60	414.882	862.182	1290.31
19.0444	69	396.882	867.182	1277.31
19.0646	52	415.882	872.182	1282.31
19.0849	59	422.882	869.182	1276.31
19.1051	61	411.882	874.182	1280.31
19.1253	69	425.882	874.182	1274.31
19.1456	73	402.882	878.182	1277.31
19.1658	62	414.882	860.182	1291.31
19.186	64	412.882	876.182	1279.31
19.2062	68	408.882	873.182	1281.31
19.2265	66	419.882	894.182	1279.31
19.2467	44	415.882	876.182	1274.31
19.2669	49	418.882	879.182	1282.31
19.2872	68	424.882	878.182	1279.31
19.3074	66	414.882	873.182	1276.31
19.3276	59	412.882	879.182	1271.31
19.3478	61	419.882	876.182	1272.31
19.3681	67	417.882	880.182	1275.31
19.3883	75	426.882	877.182	1275.31
19.4085	57	412.882	864.182	1276.31
19.4288	66	411.882	870.182	1271.31
19.449	76	420.882	867.182	1276.31
19.4692	64	412.882	861.182	1283.31
19.4895	68	415.882	863.182	1265.31
19.5097	62	402.882	867.182	1275.31
19.5299	80	414.882	877.182	1281.31
19.5501	65	409.882	869.182	1279.31
19.5704	72	418.882	879.182	1277.31
19.5906	78	406.882	870.182	1291.31
19.6108	63	410.882	879.182	1272.31
19.6311	66	408.882	872.182	1296.31
19.6513	66	424.882	867.182	1280.31
19.6715	68	409.882	879.182	1280.31
19.6917	62	431.882	877.182	1280.31
19.712	69	411.882	875.182	1275.31
19.7322	82	419.882	863.182	1280.31
19.7524	64	421.882	866.182	1274.31
19.7727	77	416.882	865.182	1276.31
19.7929	52	406.882	877.182	1269.31
19.8131	76	413.882	875.182	1271.31
19.8334	61	414.882	869.182	1275.31
19.8536	66	407.882	871.182	1277.31
19.8738	63	417.882	883.182	1290.31
19.894	76	404.882	871.182	1278.31
19.9143	72	406.882	860.182	1277.31
19.9345	58	407.882	880.182	1281.31
19.9547	68	404.882	865.182	1276.31
19.975	70	410.882	870.182	1284.31
19.9952	55	417.882	864.182	1271.31
20.0154	73	427.882	860.182	1281.31
20.0356	52	407.882	877.182	1291.31
20.0559	68	423.882	880.182	1275.31
20.0761	58	410.882	876.182	1288.31
20.0963	78	423.882	876.182	1266.31
20.1166	66	405.882	866.182	1282.31
20.1368	69	412.882	877.182	1283.31
20.157	89	404.882	873.182	1278.31
20.1773	72	417.882	872.182	1272.31
20.1975	69	404.882	864.182	1279.31
20.2177	61	406.882	886.182	1266.31
20.2379	67	418.882	870.182	1279.31
20.2582	62	408.882	871.182	1265.31
20.2784	71	406.882	874.182	1277.31
20.2986	63	416.882	868.182	1284.31
20.3189	56	413.882	873.182	1277.31
20.3391	72	405.882	873.182	1280.31
20.3593	84	416.882	869.182	1270.31
20.3795	65	417.882	863.182	1272.31
20.3998	59	418.882	861.182	1283.31
20.42	68	406.882	872.182	1266.31
20.4402	63	400.882	865.182	1272.31
20.4605	72	401.882	862.182	1290.31
20.4807	71	409.882	868.182	1280.31
20.5009	79	412.882	872.182	1268.31
20.5212	60	427.882	868.182	1281.31
20.5414	65	420.882	865.182	1282.31
20.5616	73	403.882	870.182	1281.31
20.5818	81	424.882	865.182	1276.31
20.6021	62	412.882	876.182	1272.31
20.6223	62	403.882	862.182	1284.31
20.6425	61	404.882	861.182	1267.31
20.6628	70	407.882	875.182	1266.31
20.683	79	409.882	878.182	1266.31
20.7032	57	410.882	865.182	1265.31
20.7234	67	404.882	867.182	1282.31
20.7437	74	404.882	863.182	1276.31
20.7639	65	405.882	870.182	1270.31
20.7841	77	413.882	871.182	1271.31
20.8044	61	410.882	872.182	1271.31
20.8246	91	416.882	876.182	1273.31
20.8448	66	409.882	867.182	1271.31
20.8651	56	410.882	876.182	1269.31
20.8853	67	406.882	866.182	1274.31
20.9055	62	400.882	866.182	1273.31
20.9257	84	397.882	864.182	1263.31
20.946	66	411.882	871.182	1271.31
20.9662	63	408.882	852.182	1277.31
20.9864	78	415.882	872.182	1273.31
21.0067	73	407.882	864.182	1284.31
21.0269	58	411.882	869.182	1255.31
21.0471	57	403.882	863.182	1282.31
21.0673	58	415.882	870.182	1278.31
21.0876	58	415.882	858.182	1282.31
21.1078	64	408.882	873.182	1268.31
21.128	67	414.882	875.182	1261.31
21.1483	84	409.882	872.182	1283.31
21.1685	61	408.882	869.182	1278.31
21.1887	67	409.882	864.182	1260.31
21.209	67	410.882	867.182	1278.31
21.2292	68	396.882	864.182	1270.31
21.2494	68	412.882	866.182	1267.31
21.2696	66	398.882	868.182	1274.31
21.2899	70	413.882	872.182	1285.31
21.3101	77	413.882	869.182	1261.31
21.3303	66	406.882	857.182	1272.31
21.3506	83	415.882	868.182	1262.31
21.3708	74	423.882	860.182	1274.31
21.391	77	410.882	871.182	1277.31
21.4112	61	408.882	862.182	1288.31
21.4315	60	417.882	868.182	1267.31
21.4517	67	409.882	874.182	1286.31
21.4719	73	408.882	874.182	1280.31
21.4922	81	417.882	868.182	1268.31
21.5124	66	407.882	866.182	1270.31
21.5326	61	399.882	873.182	1269.31
21.5529	69	412.882	871.182	1278.31
21.5731	82	412.882	874.182	1268.31
21.5933	63	409.882	869.182	1267.31
21.6135	65	406.882	880.182	1271.31
21.6338	66	410.882	867.182	1269.31
21.654	84	398.882	865.182	1271.31
21.6742	74	416.882	869.182	1282.31
21.6945	71	417.882	871.182	1276.31
21.7147	85	403.882	855.182	1270.31
21.7349	67	414.882	871.182	1283.31
21.7551	75	409.882	869.182	1264.31
21.7754	68	408.882	872.182	1270.31
21.7956	60	403.882	871.182	1269.31
21.8158	72	404.882	869.182	1274.31
21.8361	76	410.882	870.182	1276.31
21.8563	76	418.882	876.182	1277.31
21.8765	60	419.882	875.182	1257.31
21.8968	64	417.882	865.182	1266.31
21.917	80	409.882	873.182	1256.31
21.9372	93	410.882	855.182	1276.31
21.9574	68	407.882	876.182	1267.31
21.9777	65	402.882	869.182	1273.31
21.9979	78	406.882	870.182	1275.31
22.0181	65	401.882	865.182	1272.31
22.0384	59	411.882	872.182	1266.31
22.0586	70	419.882	871.182	1265.31
22.0788	65	416.882	867.182	1271.31
22.099	77	402.882	871.182	1264.31
22.1193	82	407.882	869.182	1285.31
22.1395	74	403.882	876.182	1273.31
22.1597	67	413.882	870.182	1268.31
22.18	67	405.882	864.182	1265.31
22.2002	63	406.882	861.182	1265.31
22.2204	64	406.882	858.182	1267.31
22.2407	79	412.882	862.182	1281.31
22.2609	60	405.882	864.182	1270.31
22.2811	61	411.882	868.182	1265.31
22.3013	65	413.882	860.182	1278.31
22.3216	61	411.882	869.182	1276.31
22.3418	63	408.882	867.182	1264.31
22.362	52	413.882	858.182	1271.31
22.3823	67	401.882	866.182	1261.31
22.4025	64	410.882	870.182	1269.31
22.4227	68	400.882	869.182	1271.31
22.4429	65	395.882	865.182	1268.31
22.4632	65	408.882	862.182	1278.31
22.4834	63	401.882	858.182	1260.31
22.5036	57	410.882	865.182	1265.31
22.5239	84	414.882	863.182	1268.31
22.5441	69	404.882	866.182	1274.31
22.5643	59	400.882	862.182	1265.31
22.5846	73	415.882	863.182	1267.31
22.6048	72	412.882	863.182	1275.31
22.625	63	409.882	864.182	1264.31
22.6452	60	414.882	872.182	1264.31
22.6655	68	407.882	867.182	1268.31
22.6857	63	404.882	874.182	1272.31
22.7059	73	397.882	862.182	1258.31
22.7262	78	403.882	866.182	1267.31
22.7464	74	408.882	874.182	1267.31
22.7666	60	403.882	862.182	1272.31
22.7868	48	402.882	869.182	1276.31
22.8071	57	404.882	858.182	1269.31
22.8273	66	420.882	860.182	1274.31
22.8475	50	405.882	863.182	1271.31
22.8678	65	411.882	879.182	1275.31
22.888	58	404.882	864.182	1271.31
22.9082	67	419.882	863.182	1268.31
22.9285	78	403.882	869.182	1269.31
22.9487	63	412.882	871.182	1268.31
22.9689	70	394.882	865.182	1276.31
22.9891	63	421.882	864.182	1274.31
23.0094	56	398.882	865.182	1269.31
23.0296	49	403.882	863.182	1260.31
23.0498	79	404.882	861.182	1263.31
23.0701	58	402.882	859.182	1275.31
23.0903	63	407.882	865.182	1269.31
23.1105	66	411.882	861.182	1271.31
23.1307	63	397.882	859.182	1267.31
23.151	67	398.882	859.182	1267.31
23.1712	44	402.882	869.182	1267.31
23.1914	46	391.882	871.182	1267.31
23.2117	66	406.882	862.182	1271.31
23.2319	57	404.882	865.182	1271.31
23.2521	73	420.882	859.182	1277.31
23.2724	46	399.882	856.182	1263.31
23.2926	69	407.882	869.182	1262.31
23.3128	46	411.882	866.182	1263.31
23.333	55	418.882	860.182	1268.31
23.3533	61	417.882	865.182	1263.31
23.3735	72	416.882	854.182	1260.31
23.3937	69	411.882	861.182	1259.31
23.414	62	408.882	875.182	1260.31
23.4342	64	399.882	858.182	1269.31
23.4544	50	412.882	864.182	1261.31
23.4746	74	408.882	860.182	1268.31
23.4949	54	406.882	873.182	1275.31
23.5151	56	399.882	861.182	1257.31
23.5353	58	411.882	861.182	1270.31
23.5556	76	391.882	859.182	1274.31
23.5758	69	405.882	861.182	1262.31
23.596	76	407.882	858.182	1265.31
23.6163	58	406.882	865.182	1273.31
23.6365	65	407.882	867.182	1273.31
23.6567	73	397.882	864.182	1270.31
23.6769	81	414.882	868.182	1272.31
23.6972	54	405.882	870.182	1268.31
23.7174	69	409.882	865.182	1273.31
23.7376	54	407.882	868.182	1268.31
23.7579	60	397.882	867.182	1258.31
23.7781	68	408.882	863.182	1263.31
23.7983	63	408.882	855.182	1276.31
23.8185	72	402.882	862.182	1281.31
23.8388	40	406.882	863.182	1264.31
23.859	49	398.882	871.182	1271.31
23.8792	57	401.882	863.182	1274.31
23.8995	65	400.882	859.182	1265.31
23.9197	64	403.882	863.182	1271.31
23.9399	67	406.882	859.182	1269.31
23.9602	63	402.882	856.182	1252.31
23.9804	50	403.882	861.182	1271.31
24.0006	55	403.882	862.182	1277.31
24.0208	59	401.882	857.182	1261.31
24.0411	66	403.882	856.182	1260.31
24.0613	63	408.882	870.182	1260.31
24.0815	46	400.882	866.182	1260.31
24.1018	63	404.882	854.182	1279.31
24.122	57	401.882	864.182	1268.31
24.1422	52	413.882	860.182	1282.31
24.1624	71	411.882	865.182	1273.31
24.1827	59	399.882	866.182	1279.31
24.2029	60	404.882	862.182	1266.31
24.2231	64	400.882	869.182	1262.31
24.2434	53	395.882	865.182	1263.31
24.2636	48	396.882	858.182	1268.31
24.2838	57	409.882	865.182	1277.31
24.3041	60	408.882	860.182	1272.31
24.3243	57	402.882	862.182	1262.31
24.3445	77	400.882	865.182	1271.31
24.3647	58	404.882	855.182	1258.31
24.385	60	402.882	861.182	1268.31
24.4052	57	410.882	863.182	1266.31
24.4254	53	411.882	867.182	1264.31
24.4457	61	397.882	863.182	1267.31
24.4659	69	404.882	857.182	1266.31
24.4861	74	412.882	860.182	1258.31
24.5063	71	397.882	856.182	1272.31
24.5266	66	401.882	856.182	1264.31
24.5468	71	393.882	863.182	1269.31
24.567	59	397.882	858.182	1275.31
24.5873	62	409.882	868.182	1266.31
24.6075	77	419.882	853.182	1258.31
24.6277	50	410.882	870.182	1263.31
24.648	66	402.882	868.182	1256.31
24.6682	60	404.882	860.182	1262.31
24.6884	47	407.882	866.182	1266.31
24.7086	63	399.882	870.182	1257.31
24.7289	57	409.882	865.182	1271.31
24.7491	74	404.882	860.182	1266.31
24.7693	57	403.882	856.182	1265.31
24.7896	53	409.882	860.182	1270.31
24.8098	65	402.882	863.182	1269.31
24.83	66	399.882	867.182	1261.31
24.8502	66	401.882	862.182	1275.31
24.8705	57	403.882	862.182	1268.31
24.8907	61	401.882	862.182	1265.31
24.9109	51	404.882	867.182	1267.31
24.9312	58	399.882	867.182	1268.31
24.9514	51	401.882	865.182	1269.31
24.9716	58	399.882	874.182	1266.31
24.9919	53	394.882	867.182	1263.31
25.0121	63	398.882	862.182	1256.31
25.0323	68	397.882	861.182	1254.31
25.0525	58	389.882	851.182	1260.31
25.0728	48	418.882	859.182	1277.31
25.093	47	399.882	864.182	1267.31
25.1132	52	407.882	860.182	1252.31
25.1335	52	407.882	856.182	1255.31
25.1537	44	402.882	862.182	1268.31
25.1739	63	401.882	859.182	1270.31
25.1941	58	401.882	867.182	1260.31
25.2144	63	406.882	860.182	1263.31
25.2346	50	401.882	856.182	1262.31
25.2548	60	397.882	861.182	1258.31
25.2751	69	403.882	856.182	1272.31
25.2953	54	409.882	862.182	1257.31
25.3155	55	399.882	861.182	1263.31
25.3358	51	408.882	860.182	1268.31
25.356	53	409.882	866.182	1267.31
25.3762	38	395.882	863.182	1266.31
25.3964	54	399.882	865.182	1264.31
25.4167	65	400.882	861.182	1265.31
25.4369	59	403.882	872.182	1265.31
25.4571	42	400.882	857.182	1275.31
25.4774	51	402.882	859.182	1266.31
25.4976	55	403.882	868.182	1265.31
25.5178	58	399.882	857.182	1257.31
25.538	49	394.882	867.182	1271.31
25.5583	61	396.882	853.182	1270.31
25.5785	44	409.882	866.182	1260.31
25.5987	55	405.882	856.182	1264.31
25.619	63	397.882	863.182	1259.31
25.6392	40	407.882	871.182	1262.31
25.6594	62	403.882	861.182	1269.31
25.6797	66	398.882	863.182	1266.31
25.6999	61	403.882	860.182	1272.31
25.7201	41	407.882	854.182	1256.31
25.7403	55	414.882	866.182	1270.31
25.7606	54	401.882	858.182	1264.31
25.7808	60	403.882	860.182	1268.31
25.801	58	394.882	860.182	1267.31
25.8213	52	407.882	863.182	1269.31
25.8415	57	418.882	864.182	1273.31
25.8617	49	404.882	864.182	1267.31
25.8819	60	397.882	858.182	1264.31
25.9022	62	412.882	872.182	1277.31
25.9224	63	403.882	868.182	1267.31
25.9426	65	396.882	855.182	1259.31
25.9629	48	397.882	862.182	1263.31
25.9831	39	406.882	864.182	1269.31
26.0033	60	393.882	865.182	1265.31
26.0236	61	406.882	860.182	1274.31
26.0438	60	402.882	866.182	1256.31
26.064	55	396.882	863.182	1262.31
26.0842	33	388.882	855.182	1267.31
26.1045	59	401.882	861.182	1262.31
26.1247	37	397.882	864.182	1271.31
26.1449	56	411.882	861.182	1258.31
26.1652	37	402.882	855.182	1257.31
26.1854	57	401.882	854.182	1253.31
26.2056	47	388.882	860.182	1253.31
26.2258	57	404.882	863.182	1265.31
26.2461	45	405.882	867.182	1259.31
26.2663	62	408.882	858.182	1266.31
26.2865	59	395.882	863.182	1262.31
26.3068	55	402.882	859.182	1267.31
26.327	50	412.882	869.182	1263.31
26.3472	50	401.882	860.182	1273.31
26.3675	52	401.882	867.182	1259.31
26.3877	42	395.882	856.182	1260.31
26.4079	57	393.882	854.182	1262.31
26.4281	59	402.882	854.182	1266.31
26.4484	47	402.882	855.182	1266.31
26.4686	62	396.882	854.182	1270.31
26.4888	56	395.882	869.182	1258.31
26.5091	44	416.882	859.182	1262.31
26.5293	58	402.882	856.182	1273.31
26.5495	60	401.882	848.182	1262.31
26.5697	46	411.882	858.182	1265.31
26.59	60	409.882	865.182	1259.31
26.6102	54	404.882	863.182	1271.31
26.6304	53	403.882	863.182	1267.31
26.6507	42	400.882	861.182	1266.31
26.6709	56	407.882	863.182	1265.31
26.6911	47	392.882	855.182	1267.31
26.7114	51	392.882	849.182	1257.31
26.7316	63	396.882	855.182	1273.31
26.7518	45	402.882	863.182	1261.31
26.772	55	395.882	863.182	1273.31
26.7923	49	400.882	862.182	1261.31
26.8125	49	397.882	858.182	1266.31
26.8327	44	399.882	861.182	1268.31
26.853	61	393.882	861.182	1270.31
26.8732	45	396.882	866.182	1256.31
26.8934	47	403.882	861.182	1271.31
26.9136	66	391.882	863.182	1267.31
26.9339	55	401.882	875.182	1264.31
26.9541	41	395.882	851.182	1260.31
26.9743	38	398.882	865.182	1267.31
26.9946	38	403.882	857.182	1266.31
27.0148	42	408.882	856.182	1273.31
27.035	46	398.882	861.182	1258.31
27.0553	41	401.882	860.182	1269.31
27.0755	56	402.882	872.182	1261.31
27.0957	56	402.882	856.182	1256.31
27.1159	43	413.882	862.182	1256.31
27.1362	44	390.882	855.182	1259.31
27.1564	43	405.882	861.182	1264.31
27.1766	56	402.882	867.182	1254.31
27.1969	44	386.882	864.182	1262.31
27.2171	60	401.882	848.182	1267.31
27.2373	43	405.882	859.182	1260.31
27.2575	49	402.882	868.182	1256.31
27.2778	38	403.882	852.182	1271.31
27.298	48	399.882	860.182	1265.31
27.3182	43	405.882	858.182	1267.31
27.3385	43	403.882	856.182	1263.31
27.3587	60	386.882	856.182	1266.31
27.3789	41	398.882	859.182	1269.31
27.3992	56	396.882	870.182	1260.31
27.4194	49	403.882	848.182	1256.31
27.4396	50	400.882	863.182	1264.31
27.4598	40	400.882	858.182	1260.31
27.4801	53	400.882	863.182	1258.31
27.5003	41	400.882	855.182	1269.31
27.5205	53	386.882	862.182	1250.31
27.5408	39	390.882	865.182	1266.31
27.561	47	398.882	853.182	1259.31
27.5812	47	406.882	858.182	1258.31
27.6014	44	397.882	851.182	1264.31
27.6217	50	400.882	850.182	1273.31
27.6419	39	403.882	866.182	1252.31
27.6621	35	397.882	865.182	1260.31
27.6824	50	403.882	862.182	1260.31
27.7026	42	396.882	863.182	1263.31
27.7228	59	391.882	862.182	1259.31
27.7431	51	401.882	850.182	1263.31
27.7633	46	397.882	857.182	1258.31
27.7835	49	385.882	862.182	1269.31
27.8037	46	396.882	857.182	1256.31
27.824	38	403.882	857.182	1275.31
27.8442	55	392.882	858.182	1266.31
27.8644	42	392.882	863.182	1264.31
27.8847	41	403.882	857.182	1266.31
27.9049	44	405.882	858.182	1250.31
27.9251	45	388.882	859.182	1265.31
27.9453	42	404.882	853.182	1261.31
27.9656	51	396.882	862.182	1251.31
27.9858	49	394.882	856.182	1268.31
28.006	39	405.882	855.182	1261.31
28.0263	57	396.882	858.182	1261.31
28.0465	35	406.882	866.182	1251.31
28.0667	47	395.882	849.182	1263.31
28.087	47	398.882	860.182	1258.31
28.1072	58	390.882	860.182	1258.31
28.1274	44	392.882	861.182	1258.31
28.1476	46	398.882	860.182	1259.31
28.1679	51	401.882	864.182	1261.31
28.1881	45	387.882	855.182	1262.31
28.2083	42	401.882	848.182	1267.31
28.2286	41	397.882	856.182	1266.31
28.2488	38	400.882	870.182	1266.31
28.269	39	395.882	862.182	1268.31
28.2892	47	390.882	854.182	1268.31
28.3095	49	388.882	853.182	1262.31
28.3297	47	405.882	867.182	1268.31
28.3499	48	390.882	860.182	1264.31
28.3702	62	394.882	862.182	1269.31
28.3904	52	396.882	865.182	1274.31
28.4106	53	401.882	865.182	1252.31
28.4309	44	400.882	851.182	1260.31
28.4511	45	402.882	855.182	1256.31
28.4713	46	404.882	855.182	1260.31
28.4915	48	401.882	863.182	1268.31
28.5118	56	404.882	858.182	1254.31
28.532	44	402.882	856.182	1264.31
28.5522	41	400.882	866.182	1263.31
28.5725	44	396.882	865.182	1261.31
28.5927	50	401.882	856.182	1267.31
28.6129	54	396.882	864.182	1260.31
28.6331	52	394.882	862.182	1258.31
28.6534	47	391.882	871.182	1262.31
28.6736	42	402.882	855.182	1267.31
28.6938	43	397.882	868.182	1262.31
28.7141	48	403.882	859.182	1255.31
28.7343	45	393.882	857.182	1271.31
28.7545	41	405.882	869.182	1250.31
28.7748	48	384.882	868.182	1256.31
28.795	48	395.882	856.182	1267.31
28.8152	50	400.882	868.182	1249.31
28.8354	45	397.882	851.182	1261.31
28.8557	51	390.882	849.182	1264.31
28.8759	59	398.882	857.182	1265.31
28.8961	50	399.882	866.182	1251.31
28.9164	41	390.882	864.182	1251.31
28.9366	55	396.882	860.182	1251.31
28.9568	37	403.882	855.182	1263.31
28.977	42	398.882	860.182	1267.31
28.9973	48	397.882	860.182	1261.31
29.0175	40	393.882	855.182	1257.31
29.0377	43	399.882	857.182	1261.31
29.058	53	394.882	856.182	1249.31
29.0782	37	395.882	873.182	1270.31
29.0984	45	390.882	847.182	1258.31
29.1187	49	395.882	853.182	1254.31
29.1389	51	400.882	851.182	1262.31
29.1591	49	396.882	859.182	1262.31
29.1793	53	402.882	849.182	1257.31
29.1996	44	408.882	864.182	1253.31
29.2198	52	401.882	863.182	1265.31
29.24	50	403.882	861.182	1261.31
29.2603	54	399.882	851.182	1267.31
29.2805	54	380.882	854.182	1252.31
29.3007	37	392.882	857.182	1261.31
29.3209	50	394.882	855.182	1255.31
29.3412	51	392.882	854.182	1261.31
29.3614	49	396.882	860.182	1259.31
29.3816	41	398.882	851.182	1261.31
29.4019	44	398.882	853.182	1256.31
29.4221	31	399.882	865.182	1261.31
29.4423	46	395.882	851.182	1263.31
29.4626	43	401.882	858.182	1272.31
29.4828	44	401.882	865.182	1260.31
29.503	33	402.882	862.182	1253.31
29.5232	49	399.882	847.182	1260.31
29.5435	66	388.882	855.182	1251.31
29.5637	46	393.882	860.182	1265.31
29.5839	43	390.882	848.182	1258.31
29.6042	42	399.882	860.182	1257.31
29.6244	36	402.882	863.182	1250.31
29.6446	44	396.882	860.182	1258.31
29.6648	58	392.882	865.182	1268.31
29.6851	42	397.882	856.182	1269.31
29.7053	37	400.882	849.182	1264.31
29.7255	47	398.882	866.182	1259.31
29.7458	43	391.882	860.182	1253.31
29.766	45	395.882	854.182	1265.31
29.7862	49	397.882	858.182	1259.31
29.8065	48	393.882	861.182	1258.31
29.8267	41	396.882	855.182	1248.31
29.8469	39	392.882	858.182	1258.31
29.8671	50	409.882	861.182	1262.31
29.8874	41	398.882	856.182	1260.31
29.9076	40	393.882	847.182	1254.31
29.9278	35	398.882	866.182	1256.31
29.9481	42	401.882	861.182	1260.31
29.9683	39	386.882	858.182	1266.31
29.9885	48	393.882	859.182	1250.31
30.0087	43	390.882	855.182	1258.31
30.029	46	393.882	851.182	1253.31
30.0492	35	388.882	860.182	1257.31
30.0694	36	393.882	857.182	1255.31
30.0897	51	393.882	859.182	1259.31
30.1099	39	397.882	861.182	1262.31
30.1301	37	398.882	853.182	1261.31
30.1504	50	409.882	855.182	1264.31
30.1706	29	398.882	850.182	1258.31
30.1908	50	403.882	856.182	1252.31
30.211	34	393.882	858.182	1263.31
30.2313	39	395.882	854.182	1267.31
30.2515	41	399.882	856.182	1251.31
30.2717	45	392.882	855.182	1255.31
30.292	46	393.882	857.182	1255.31
30.3122	34	400.882	855.182	1258.31
30.3324	46	398.882	861.182	1260.31
30.3526	44	396.882	859.182	1259.31
30.3729	32	389.882	861.182	1263.31
30.3931	44	393.882	855.182	1261.31
30.4133	33	396.882	858.182	1259.31
30.4336	46	403.882	865.182	1254.31
30.4538	35	393.882	860.182	1254.31
30.474	46	395.882	858.182	1269.31
30.4943	35	403.882	856.182	1259.31
30.5145	40	394.882	861.182	1267.31
30.5347	54	399.882	863.182	1263.31
30.5549	30	397.882	862.182	1257.31
30.5752	43	394.882	869.182	1256.31
30.5954	43	403.882	854.182	1268.31
30.6156	41	393.882	847.182	1262.31
30.6359	38	399.882	853.182	1264.31
30.6561	28	390.882	856.182	1254.31
30.6763	52	395.882	857.182	1259.31
30.6965	43	391.882	853.182	1263.31
30.7168	46	398.882	866.182	1257.31
30.737	55	403.882	860.182	1264.31
30.7572	42	394.882	864.182	1257.31
30.7775	36	404.882	855.182	1250.31
30.7977	34	398.882	851.182	1259.31
30.8179	35	406.882	857.182	1260.31
30.8382	44	401.882	863.182	1260.31
30.8584	40	401.882	862.182	1254.31
30.8786	39	397.882	865.182	1257.31
30.8988	42	393.882	858.182	1261.31
30.9191	48	392.882	848.182	1257.31
30.9393	45	396.882	856.182	1254.31
30.9595	39	396.882	854.182	1269.31
30.9798	62	389.882	857.182	1254.31
31	44	393.882	855.182	1257.31
31.0202	45	401.882	869.182	1250.31
31.0404	56	395.882	852.182	1263.31
31.0607	45	401.882	853.182	1264.31
31.0809	51	399.882	856.182	1255.31
31.1011	43	397.882	861.182	1261.31
31.1214	48	402.882	855.182	1264.31
31.1416	46	387.882	852.182	1255.31
31.1618	47	396.882	860.182	1254.31
31.1821	42	400.882	859.182	1265.31
31.2023	34	402.882	868.182	1258.31
31.2225	41	402.882	855.182	1259.31
31.2427	43	396.882	857.182	1253.31
31.263	51	410.882	857.182	1257.31
31.2832	47	393.882	848.182	1264.31
31.3034	35	398.882	856.182	1260.31
31.3237	32	409.882	857.182	1264.31
31.3439	33	400.882	854.182	1264.31
31.3641	34	391.882	861.182	1261.31
31.3843	48	390.882	858.182	1266.31
31.4046	35	390.882	862.182	1258.31
31.4248	52	400.882	860.182	1254.31
31.445	34	389.882	858.182	1261.31
31.4653	50	395.882	859.182	1256.31
31.4855	48	394.882	863.182	1267.31
31.5057	47	391.882	852.182	1261.31
31.526	46	392.882	851.182	1270.31
31.5462	48	394.882	857.182	1253.31
31.5664	47	398.882	866.182	1262.31
31.5866	37	405.882	854.182	1259.31
31.6069	39	390.882	852.182	1268.31
31.6271	39	392.882	859.182	1258.31
31.6473	44	398.882	849.182	1251.31
31.6676	33	389.882	864.182	1256.31
31.6878	52	393.882	850.182	1264.31
31.708	36	399.882	853.182	1263.31
31.7282	45	393.882	859.182	1256.31
31.7485	51	388.882	855.182	1266.31
31.7687	39	398.882	862.182	1258.31
31.7889	42	398.882	854.182	1259.31
31.8092	41	398.882	856.182	1256.31
31.8294	35	397.882	852.182	1254.31
31.8496	36	393.882	867.182	1257.31
31.8699	46	398.882	852.182	1263.31
31.8901	45	396.882	862.182	1254.31
31.9103	36	394.882	852.182	1261.31
31.9305	50	391.882	862.182	1263.31
31.9508	48	396.882	865.182	1256.31
31.971	43	393.882	860.182	1260.31
31.9912	44	400.882	861.182	1251.31
32.0115	47	393.882	866.182	1255.31
32.0317	41	392.882	862.182	1264.31
32.0519	42	405.882	856.182	1258.31
32.0721	54	399.882	861.182	1265.31
32.0924	48	401.882	863.182	1258.31
32.1126	35	400.882	857.182	1262.31
32.1328	39	402.882	863.182	1261.31
32.1531	48	399.882	870.182	1257.31
32.1733	37	392.882	862.182	1259.31
32.1935	43	401.882	853.182	1251.31
32.2138	43	390.882	842.182	1251.31
32.234	46	398.882	855.182	1270.31
32.2542	36	409.882	854.182	1246.31
32.2744	39	399.882	861.182	1262.31
32.2947	37	396.882	861.182	1249.31
32.3149	49	395.882	861.182	1263.31
32.3351	47	404.882	856.182	1259.31
32.3554	45	404.882	862.182	1270.31
32.3756	49	393.882	854.182	1263.31
32.3958	54	401.882	861.182	1272.31
32.416	49	389.882	860.182	1266.31
32.4363	54	384.882	857.182	1265.31
32.4565	48	396.882	873.182	1260.31
32.4767	57	403.882	856.182	1259.31
32.497	39	406.882	865.182	1255.31
32.5172	55	399.882	856.182	1267.31
32.5374	40	390.882	856.182	1258.31
32.5577	42	399.882	858.182	1253.31
32.5779	45	402.882	861.182	1258.31
32.5981	41	396.882	853.182	1257.31
32.6183	41	400.882	855.182	1264.31
32.6386	55	394.882	856.182	1261.31
32.6588	46	402.882	868.182	1259.31
32.679	58	398.882	859.182	1261.31
32.6993	44	398.882	857.182	1261.31
32.7195	53	399.882	856.182	1251.31
32.7397	44	401.882	857.182	1263.31
32.7599	51	406.882	856.182	1260.31
32.7802	53	396.882	861.182	1261.31
32.8004	57	386.882	862.182	1250.31
32.8206	48	397.882	857.182	1259.31
32.8409	44	395.882	851.182	1254.31
32.8611	55	382.882	870.182	1257.31
32.8813	57	397.882	858.182	1256.31
32.9016	46	406.882	850.182	1247.31
32.9218	62	393.882	857.182	1253.31
32.942	56	406.882	851.182	1253.31
32.9622	50	398.882	846.182	1256.31
32.9825	58	396.882	854.182	1252.31
33.0027	65	389.882	854.182	1258.31
33.0229	65	404.882	852.182	1268.31
33.0432	55	407.882	856.182	1249.31
33.0634	79	402.882	857.182	1265.31
33.0836	75	402.882	857.182	1259.31
33.1038	65	409.882	872.182	1265.31
33.1241	60	395.882	861.182	1263.31
33.1443	67	404.882	854.182	1259.31
33.1645	76	394.882	860.182	1255.31
33.1848	85	406.882	865.182	1262.31
33.205	68	399.882	859.182	1263.31
33.2252	101	399.882	857.182	1247.31
33.2455	78	399.882	859.182	1254.31
33.2657	109	401.882	860.182	1263.31
33.2859	107	410.882	864.182	1265.31
33.3061	108	403.882	863.182	1257.31
33.3264	132	388.882	858.182	1262.31
33.3466	136	410.882	859.182	1266.31
33.3668	141	405.882	861.182	1273.31
33.3871	141	401.882	875.182	1276.31
33.4073	184	421.882	875.182	1286.31
33.4275	191	413.882	885.182	1278.31
33.4477	232	423.882	881.182	1278.31
33.468	245	454.882	888.182	1286.31
33.4882	284	453.882	899.182	1281.31
33.5084	311	473.882	899.182	1297.31
33.5287	284	487.882	915.182	1302.31
33.5489	323	465.882	917.182	1303.31
33.5691	332	476.882	935.182	1295.31
33.5894	350	473.882	929.182	1311.31
33.6096	334	498.882	924.182	1296.31
33.6298	364	461.882	929.182	1311.31
33.65	368	469.882	925.182	1310.31
33.6703	333	478.882	914.182	1301.31
33.6905	341	476.882	900.182	1288.31
33.7107	333	464.882	923.182	1303.31
33.731	340	454.882	926.182	1307.31
33.7512	314	466.882	925.182	1300.31
33.7714	283	466.882	915.182	1288.31
33.7916	303	458.882	924.182	1294.31
33.8119	297	462.882	934.182	1288.31
33.8321	295	475.882	928.182	1281.31
33.8523	299	464.882	914.182	1283.31
33.8726	296	462.882	920.182	1284.31
33.8928	287	461.882	922.182	1285.31
33.913	290	463.882	899.182	1287.31
33.9333	285	469.882	920.182	1294.31
33.9535	310	471.882	930.182	1273.31
33.9737	264	463.882	940.182	1290.31
33.9939	308	462.882	940.182	1288.31
34.0142	285	470.882	937.182	1294.31
34.0344	300	463.882	931.182	1280.31
34.0546	318	464.882	926.182	1286.31
34.0749	275	458.882	947.182	1291.31
34.0951	298	459.882	935.182	1291.31
34.1153	328	468.882	919.182	1297.31
34.1355	310	483.882	950.182	1289.31
34.1558	325	476.882	935.182	1290.31
34.176	275	458.882	946.182	1290.31
34.1962	312	476.882	946.182	1292.31
34.2165	311	464.882	941.182	1291.31
34.2367	346	466.882	926.182	1297.31
34.2569	351	491.882	951.182	1287.31
34.2772	318	471.882	956.182	1298.31
34.2974	328	485.882	943.182	1321.31
34.3176	359	494.882	957.182	1316.31
34.3378	323	534.882	970.182	1307.31
34.3581	336	522.882	982.182	1358.31
34.3783	365	519.882	999.182	1344.31
34.3985	388	544.882	1000.18	1343.31
34.4188	398	544.882	991.182	1365.31
34.439	351	530.882	1009.18	1341.31
34.4592	377	552.882	1036.18	1353.31
34.4794	393	540.882	1018.18	1364.31
34.4997	425	547.882	1007.18	1348.31
34.5199	428	567.882	1036.18	1382.31
34.5401	406	558.882	1010.18	1359.31
34.5604	444	572.882	1018.18	1357.31
34.5806	437	558.882	1000.18	1373.31
34.6008	448	564.882	1017.18	1390.31
34.6211	437	583.882	1022.18	1373.31
34.6413	466	557.882	1034.18	1379.31
34.6615	487	570.882	1036.18	1394.31
34.6817	474	567.882	1029.18	1401.31
34.702	493	596.882	1038.18	1386.31
34.7222	486	580.882	1046.18	1395.31
34.7424	528	588.882	1054.18	1368.31
34.7627	500	593.882	1025.18	1361.31
34.7829	513	597.882	1069.18	1381.31
34.8031	534	600.882	1082.18	1401.31
34.8233	525	610.882	1039.18	1394.31
34.8436	547	610.882	1086.18	1392.31
34.8638	579	619.882	1062.18	1398.31
34.884	591	625.882	1074.18	1411.31
34.9043	570	615.882	1070.18	1421.31
34.9245	592	663.882	1074.18	1446.31
34.9447	619	651.882	1067.18	1413.31
34.965	668	639.882	1108.18	1424.31
34.9852	748	655.882	1073.18	1431.31
35.0054	679	641.882	1106.18	1435.31
35.0256	691	674.882	1129.18	1444.31
35.0459	757	713.882	1113.18	1471.31
35.0661	813	736.882	1152.18	1518.31
35.0863	831	737.882	1169.18	1485.31
35.1066	844	813.882	1167.18	1550.31
35.1268	894	788.882	1188.18	1569.31
35.147	946	871.882	1248.18	1613.31
35.1672	991	930.882	1269.18	1650.31
35.1875	1026	934.882	1352.18	1696.31
35.2077	1113	995.882	1329.18	1705.31
35.2279	1232	1062.88	1342.18	1793.31
35.2482	1291	1045.88	1419.18	1794.31
35.2684	1408	1099.88	1476.18	1885.31
35.2886	1579	1184.88	1472.18	1978.31
35.3089	1683	1291.88	1558.18	2145.31
35.3291	1795	1314.88	1539.18	2270.31
35.3493	2075	1454.88	1728.18	2521.31
35.3695	2218	1672.88	1822.18	2896.31
35.3898	2501	1891.88	2022.18	3276.31
35.41	2847	2402.88	2329.18	3968.31
35.4302	3187	2870.88	2686.18	4820.31
35.4505	3514	3741.88	3410.18	5960.31
35.4707	3940	5102.88	4228.18	7502.31
35.4909	4419	7104.88	5568.18	9565.31
35.5111	4927	9669.88	7525.18	11576.3
35.5314	5493	13308.9	10379.2	14294.3
35.5516	6090	17658.9	13701.2	16908.3
35.5718	6453	21656.9	17247.2	18377.3
35.5921	6750	24437.9	20520.2	19650.3
35.6123	6790	24915.9	22201.2	20633.3
35.6325	6256	22778.9	21237.2	20025.3
35.6528	5508	19425.9	17926.2	18957.3
35.673	4935	16205.9	14841.2	16695.3
35.6932	4363	13791.9	12630.2	14496.3
35.7134	3924	11454.9	10937.2	11865.3
35.7337	3341	8636.88	8502.18	9444.31
35.7539	2679	5801.88	5781.18	7455.31
35.7741	2248	3833.88	3872.18	5874.31
35.7944	1895	2571.88	2743.18	4494.31
35.8146	1655	2038.88	2132.18	3333.31
35.8348	1537	1722.88	1979.18	2574.31
35.855	1426	1553.88	1765.18	2196.31
35.8753	1378	1356.88	1662.18	2048.31
35.8955	1300	1240.88	1610.18	1913.31
35.9157	1119	1188.88	1461.18	1803.31
35.936	1058	1096.88	1406.18	1748.31
35.9562	1044	1042.88	1353.18	1735.31
35.9764	982	936.882	1316.18	1662.31
35.9967	917	907.882	1268.18	1593.31
36.0169	881	832.882	1201.18	1541.31
36.0371	805	831.882	1195.18	1526.31
36.0573	819	760.882	1146.18	1493.31
36.0776	748	728.882	1117.18	1442.31
36.0978	667	708.882	1125.18	1468.31
36.118	650	706.882	1129.18	1442.31
36.1383	665	664.882	1073.18	1439.31
36.1585	629	675.882	1046.18	1425.31
36.1787	636	676.882	1069.18	1422.31
36.1989	580	657.882	1017.18	1397.31
36.2192	554	628.882	1041.18	1421.31
36.2394	581	601.882	1028.18	1392.31
36.2596	520	607.882	1039.18	1400.31
36.2799	534	621.882	1034.18	1400.31
36.3001	498	601.882	1013.18	1372.31
36.3203	507	600.882	1020.18	1388.31
36.3406	490	597.882	1008.18	1373.31
36.3608	445	569.882	994.182	1376.31
36.381	436	565.882	995.182	1374.31
36.4012	485	551.882	987.182	1365.31
36.4215	428	551.882	1012.18	1358.31
36.4417	422	567.882	972.182	1342.31
36.4619	442	526.882	974.182	1359.31
36.4822	379	542.882	975.182	1358.31
36.5024	436	564.882	989.182	1364.31
36.5226	402	529.882	987.182	1340.31
36.5428	375	528.882	970.182	1345.31
36.5631	404	525.882	956.182	1341.31
36.5833	374	535.882	974.182	1351.31
36.6035	349	503.882	961.182	1330.31
36.6238	360	533.882	956.182	1328.31
36.644	334	495.882	971.182	1359.31
36.6642	307	508.882	958.182	1328.31
36.6845	356	502.882	947.182	1312.31
36.7047	319	532.882	939.182	1347.31
36.7249	338	516.882	939.182	1321.31
36.7451	311	499.882	948.182	1326.31
36.7654	289	510.882	944.182	1310.31
36.7856	333	507.882	957.182	1329.31
36.8058	327	500.882	948.182	1342.31
36.8261	305	491.882	945.182	1328.31
36.8463	300	485.882	932.182	1314.31
36.8665	316	496.882	947.182	1311.31
36.8867	282	490.882	930.182	1312.31
36.907	288	492.882	924.182	1304.31
36.9272	298	494.882	910.182	1315.31
36.9474	263	481.882	928.182	1315.31
36.9677	242	465.882	919.182	1321.31
36.9879	280	472.882	922.182	1309.31
37.0081	246	469.882	925.182	1295.31
37.0284	220	463.882	925.182	1303.31
37.0486	264	456.882	911.182	1300.31
37.0688	279	497.882	914.182	1304.31
37.089	246	469.882	923.182	1299.31
37.1093	261	449.882	933.182	1304.31
37.1295	223	463.882	906.182	1291.31
37.1497	254	465.882	913.182	1285.31
37.17	249	460.882	910.182	1291.31
37.1902	256	444.882	910.182	1292.31
37.2104	235	483.882	922.182	1319.31
37.2306	201	435.882	917.182	1298.31
37.2509	230	455.882	914.182	1290.31
37.2711	221	464.882	901.182	1285.31
37.2913	187	453.882	903.182	1292.31
37.3116	211	450.882	917.182	1287.31
37.3318	227	448.882	911.182	1288.31
37.352	207	445.882	892.182	1290.31
37.3723	220	442.882	917.182	1301.31
37.3925	191	443.882	903.182	1279.31
37.4127	186	447.882	908.182	1282.31
37.4329	194	450.882	905.182	1281.31
37.4532	184	443.882	909.182	1287.31
37.4734	171	441.882	914.182	1285.31
37.4936	173	442.882	904.182	1292.31
37.5139	210	419.882	904.182	1285.31
37.5341	167	422.882	905.182	1275.31
37.5543	178	426.882	888.182	1285.31
37.5745	184	429.882	890.182	1272.31
37.5948	193	432.882	890.182	1279.31
37.615	181	436.882	899.182	1296.31
37.6352	193	437.882	885.182	1265.31
37.6555	171	432.882	886.182	1275.31
37.6757	176	432.882	907.182	1294.31
37.6959	165	448.882	895.182	1288.31
37.7162	126	432.882	920.182	1279.31
37.7364	179	428.882	889.182	1287.31
37.7566	166	426.882	898.182	1282.31
37.7768	168	432.882	892.182	1286.31
37.7971	176	430.882	909.182	1288.31
37.8173	169	424.882	896.182	1281.31
37.8375	167	433.882	896.182	1277.31
37.8578	166	419.882	903.182	1270.31
37.878	134	418.882	903.182	1289.31
37.8982	144	432.882	896.182	1279.31
37.9184	148	422.882	904.182	1279.31
37.9387	155	433.882	901.182	1284.31
37.9589	158	426.882	898.182	1259.31
37.9791	150	415.882	883.182	1275.31
37.9994	141	433.882	898.182	1282.31
38.0196	158	418.882	885.182	1280.31
38.0398	147	423.882	898.182	1278.31
38.0601	131	419.882	908.182	1278.31
38.0803	152	432.882	897.182	1274.31
38.1005	152	427.882	885.182	1292.31
38.1207	148	415.882	890.182	1278.31
38.141	124	416.882	903.182	1276.31
38.1612	147	418.882	894.182	1281.31
38.1814	138	417.882	890.182	1261.31
38.2017	150	440.882	883.182	1267.31
38.2219	137	425.882	889.182	1278.31
38.2421	140	414.882	897.182	1264.31
38.2623	132	410.882	881.182	1262.31
38.2826	139	428.882	896.182	1279.31
38.3028	132	421.882	894.182	1288.31
38.323	151	424.882	878.182	1284.31
38.3433	125	427.882	888.182	1274.31
38.3635	119	420.882	893.182	1269.31
38.3837	125	421.882	882.182	1275.31
38.404	108	420.882	899.182	1276.31
38.4242	147	426.882	886.182	1271.31
38.4444	103	424.882	891.182	1276.31
38.4646	127	419.882	889.182	1264.31
38.4849	132	428.882	873.182	1259.31
38.5051	126	418.882	880.182	1260.31
38.5253	134	409.882	890.182	1271.31
38.5456	102	413.882	885.182	1269.31
38.5658	125	414.882	883.182	1256.31
38.586	136	409.882	881.182	1272.31
38.6062	136	407.882	879.182	1262.31
38.6265	111	418.882	878.182	1259.31
38.6467	116	409.882	882.182	1258.31
38.6669	112	421.882	872.182	1257.31
38.6872	113	422.882	868.182	1267.31
38.7074	104	404.882	885.182	1267.31
38.7276	122	415.882	873.182	1265.31
38.7479	110	413.882	876.182	1262.31
38.7681	96	427.882	876.182	1263.31
38.7883	118	404.882	876.182	1268.31
38.8085	139	412.882	878.182	1264.31
38.8288	117	409.882	878.182	1270.31
38.849	130	411.882	880.182	1271.31
38.8692	108	413.882	880.182	1268.31
38.8895	126	417.882	870.182	1262.31
38.9097	132	418.882	869.182	1267.31
38.9299	110	417.882	877.182	1259.31
38.9501	101	425.882	874.182	1258.31
38.9704	98	415.882	860.182	1259.31
38.9906	108	413.882	874.182	1263.31
39.0108	133	416.882	872.182	1256.31
39.0311	106	402.882	878.182	1265.31
39.0513	106	412.882	881.182	1268.31
39.0715	99	410.882	877.182	1265.31
39.0918	105	394.882	867.182	1264.31
39.112	116	417.882	876.182	1260.31
39.1322	113	421.882	884.182	1255.31
39.1524	114	418.882	878.182	1267.31
39.1727	101	410.882	880.182	1264.31
39.1929	107	411.882	866.182	1267.31
39.2131	134	400.882	867.182	1273.31
39.2334	112	410.882	877.182	1264.31
39.2536	95	414.882	882.182	1267.31
39.2738	105	408.882	870.182	1277.31
39.294	110	418.882	867.182	1270.31
39.3143	107	406.882	873.182	1254.31
39.3345	97	416.882	869.182	1263.31
39.3547	103	412.882	878.182	1264.31
39.375	110	402.882	870.182	1260.31
39.3952	104	416.882	863.182	1250.31
39.4154	113	411.882	878.182	1260.31
39.4357	113	415.882	875.182	1264.31
39.4559	128	411.882	872.182	1264.31
39.4761	118	411.882	862.182	1269.31
39.4963	105	419.882	871.182	1264.31
39.5166	113	413.882	876.182	1260.31
39.5368	126	406.882	877.182	1265.31
39.557	92	415.882	874.182	1263.31
39.5773	103	402.882	869.182	1265.31
39.5975	107	407.882	886.182	1260.31
39.6177	112	408.882	871.182	1263.31
39.6379	105	409.882	872.182	1266.31
39.6582	108	413.882	884.182	1269.31
39.6784	115	418.882	860.182	1263.31
39.6986	125	407.882	871.182	1271.31
39.7189	87	411.882	872.182	1261.31
39.7391	104	416.882	869.182	1258.31
39.7593	109	416.882	875.182	1269.31
39.7796	106	405.882	867.182	1274.31
39.7998	107	409.882	885.182	1270.31
39.82	114	415.882	873.182	1264.31
39.8402	115	423.882	885.182	1265.31
39.8605	108	434.882	887.182	1270.31
39.8807	123	416.882	877.182	1274.31
39.9009	115	423.882	879.182	1272.31
39.9212	130	418.882	881.182	1282.31
39.9414	135	413.882	881.182	1275.31
39.9616	120	429.882	893.182	1276.31
39.9818	125	428.882	882.182	1282.31
40.0021	114	429.882	896.182	1279.31
40.0223	108	423.882	879.182	1281.31
40.0425	128	417.882	888.182	1272.31
40.0628	118	417.882	886.182	1270.31
40.083	96	429.882	887.182	1268.31
40.1032	142	418.882	895.182	1278.31
40.1235	117	427.882	881.182	1284.31
40.1437	117	435.882	886.182	1269.31
40.1639	116	452.882	889.182	1272.31
40.1841	115	417.882	881.182	1264.31
40.2044	109	424.882	887.182	1279.31
40.2246	123	432.882	894.182	1276.31
40.2448	139	441.882	873.182	1279.31
40.2651	156	427.882	871.182	1273.31
40.2853	124	427.882	889.182	1285.31
40.3055	120	430.882	885.182	1287.31
40.3257	134	431.882	882.182	1281.31
40.346	100	428.882	888.182	1279.31
40.3662	139	441.882	884.182	1292.31
40.3864	142	433.882	892.182	1269.31
40.4067	144	424.882	885.182	1289.31
40.4269	109	428.882	877.182	1270.31
40.4471	125	436.882	881.182	1262.31
40.4674	125	438.882	889.182	1282.31
40.4876	143	458.882	893.182	1283.31
40.5078	146	427.882	892.182	1286.31
40.528	155	431.882	893.182	1286.31
40.5483	142	447.882	895.182	1281.31
40.5685	145	435.882	907.182	1280.31
40.5887	144	438.882	894.182	1277.31
40.609	168	453.882	895.182	1285.31
40.6292	153	450.882	891.182	1295.31
40.6494	165	437.882	887.182	1269.31
40.6697	146	445.882	893.182	1290.31
40.6899	154	445.882	897.182	1295.31
40.7101	178	435.882	914.182	1290.31
40.7303	178	446.882	896.182	1286.31
40.7506	147	457.882	928.182	1290.31
40.7708	154	458.882	909.182	1294.31
40.791	149	453.882	899.182	1297.31
40.8113	172	479.882	910.182	1307.31
40.8315	149	485.882	935.182	1293.31
40.8517	171	478.882	901.182	1313.31
40.8719	192	489.882	911.182	1335.31
40.8922	189	481.882	928.182	1338.31
40.9124	204	505.882	922.182	1323.31
40.9326	224	531.882	931.182	1330.31
40.9529	221	519.882	953.182	1323.31
40.9731	229	532.882	965.182	1349.31
40.9933	215	518.882	974.182	1356.31
41.0136	252	551.882	986.182	1390.31
41.0338	245	565.882	991.182	1418.31
41.054	249	604.882	1002.18	1449.31
41.0742	270	590.882	1019.18	1462.31
41.0945	290	594.882	1031.18	1522.31
41.1147	283	686.882	1077.18	1600.31
41.1349	303	711.882	1115.18	1666.31
41.1552	339	797.882	1145.18	1726.31
41.1754	386	889.882	1222.18	1893.31
41.1956	399	1042.88	1290.18	2022.31
41.2158	463	1216.88	1427.18	2212.31
41.2361	479	1487.88	1578.18	2535.31
41.2563	477	1937.88	1942.18	2845.31
41.2765	569	2360.88	2293.18	3235.31
41.2968	590	2885.88	2818.18	3599.31
41.317	674	3432.88	3315.18	3895.31
41.3372	708	3629.88	3797.18	4048.31
41.3575	723	3829.88	3988.18	4363.31
41.3777	622	3513.88	3908.18	4352.31
41.3979	606	3057.88	3506.18	4167.31
41.4181	564	2774.88	3061.18	3802.31
41.4384	497	2360.88	2744.18	3584.31
41.4586	472	2200.88	2615.18	3269.31
41.4788	429	1850.88	2427.18	2912.31
41.4991	376	1594.88	2073.18	2560.31
41.5193	333	1165.88	1666.18	2300.31
41.5395	281	931.882	1394.18	1998.31
41.5597	271	786.882	1207.18	1817.31
41.58	232	721.882	1126.18	1631.31
41.6002	213	678.882	1068.18	1499.31
41.6204	203	581.882	1026.18	1449.31
41.6407	184	581.882	1009.18	1387.31
41.6609	171	564.882	980.182	1390.31
41.6811	171	537.882	993.182	1355.31
41.7014	174	536.882	966.182	1332.31
41.7216	156	510.882	961.182	1331.31
41.7418	156	489.882	945.182	1326.31
41.762	149	480.882	935.182	1329.31
41.7823	157	468.882	919.182	1304.31
41.8025	142	471.882	931.182	1323.31
41.8227	123	456.882	912.182	1315.31
41.843	125	474.882	909.182	1303.31
41.8632	133	462.882	905.182	1302.31
41.8834	109	449.882	911.182	1283.31
41.9036	136	451.882	896.182	1296.31
41.9239	122	453.882	909.182	1289.31
41.9441	122	434.882	885.182	1280.31
41.9643	128	434.882	884.182	1291.31
41.9846	113	446.882	884.182	1285.31
42.0048	113	446.882	882.182	1294.31
42.025	115	437.882	877.182	1292.31
42.0453	100	438.882	885.182	1284.31
42.0655	97	432.882	892.182	1274.31
42.0857	106	435.882	883.182	1272.31
42.1059	105	434.882	880.182	1275.31
42.1262	91	423.882	884.182	1275.31
42.1464	124	410.882	887.182	1273.31
42.1666	87	419.882	883.182	1271.31
42.1869	95	416.882	878.182	1271.31
42.2071	85	421.882	873.182	1274.31
42.2273	91	412.882	883.182	1265.31
42.2475	87	416.882	882.182	1270.31
42.2678	90	420.882	874.182	1270.31
42.288	92	423.882	872.182	1267.31
42.3082	84	424.882	874.182	1282.31
42.3285	85	405.882	872.182	1274.31
42.3487	69	421.882	858.182	1274.31
42.3689	90	411.882	871.182	1269.31
42.3892	103	415.882	876.182	1259.31
42.4094	82	416.882	859.182	1265.31
42.4296	88	403.882	865.182	1266.31
42.4498	82	417.882	870.182	1264.31
42.4701	75	411.882	868.182	1271.31
42.4903	66	414.882	865.182	1265.31
42.5105	85	435.882	868.182	1270.31
42.5308	71	401.882	877.182	1272.31
42.551	70	406.882	865.182	1268.31
42.5712	99	408.882	870.182	1262.31
42.5914	73	413.882	879.182	1271.31
42.6117	67	417.882	875.182	1267.31
42.6319	69	411.882	862.182	1260.31
42.6521	67	405.882	872.182	1263.31
42.6724	76	392.882	868.182	1271.31
42.6926	65	408.882	870.182	1263.31
42.7128	72	403.882	861.182	1261.31
42.7331	61	407.882	871.182	1267.31
42.7533	65	410.882	865.182	1261.31
42.7735	76	408.882	866.182	1267.31
42.7937	68	402.882	861.182	1269.31
42.814	65	401.882	871.182	1272.31
42.8342	58	411.882	867.182	1262.31
42.8544	59	407.882	859.182	1268.31
42.8747	58	408.882	870.182	1268.31
42.8949	69	404.882	871.182	1262.31
42.9151	71	401.882	868.182	1271.31
42.9353	58	407.882	870.182	1257.31
42.9556	59	413.882	863.182	1264.31
42.9758	58	398.882	877.182	1260.31
42.996	73	399.882	866.182	1258.31
43.0163	60	409.882	879.182	1261.31
43.0365	66	404.882	870.182	1260.31
43.0567	62	401.882	857.182	1252.31
43.077	50	394.882	858.182	1250.31
43.0972	52	404.882	866.182	1267.31
43.1174	52	404.882	858.182	1252.31
43.1376	66	389.882	857.182	1264.31
43.1579	61	399.882	869.182	1262.31
43.1781	63	393.882	863.182	1263.31
43.1983	52	401.882	861.182	1261.31
43.2186	52	405.882	871.182	1252.31
43.2388	54	392.882	869.182	1246.31
43.259	58	403.882	859.182	1253.31
43.2792	55	420.882	863.182	1249.31
43.2995	61	400.882	860.182	1260.31
43.3197	48	402.882	869.182	1260.31
43.3399	58	402.882	871.182	1255.31
43.3602	55	398.882	868.182	1265.31
43.3804	54	393.882	866.182	1258.31
43.4006	55	397.882	865.182	1252.31
43.4209	48	408.882	858.182	1257.31
43.4411	53	400.882	854.182	1260.31
43.4613	58	404.882	861.182	1256.31
43.4815	42	395.882	867.182	1269.31
43.5018	58	399.882	856.182	1255.31
43.522	53	393.882	853.182	1257.31
43.5422	64	400.882	858.182	1261.31
43.5625	50	403.882	864.182	1253.31
43.5827	45	400.882	855.182	1256.31
43.6029	56	395.882	861.182	1261.31
43.6231	41	402.882	858.182	1255.31
43.6434	49	391.882	868.182	1248.31
43.6636	61	397.882	859.182	1255.31
43.6838	56	397.882	848.182	1264.31
43.7041	44	396.882	868.182	1254.31
43.7243	48	402.882	865.182	1252.31
43.7445	36	395.882	851.182	1253.31
43.7648	59	399.882	868.182	1266.31
43.785	43	397.882	856.182	1269.31
43.8052	49	393.882	851.182	1260.31
43.8254	37	401.882	869.182	1255.31
43.8457	39	394.882	854.182	1260.31
43.8659	46	383.882	858.182	1259.31
43.8861	59	396.882	863.182	1265.31
43.9064	50	393.882	854.182	1256.31
43.9266	51	394.882	864.182	1258.31
43.9468	50	401.882	851.182	1255.31
43.967	43	392.882	859.182	1258.31
43.9873	41	404.882	858.182	1261.31
44.0075	57	387.882	852.182	1267.31
44.0277	40	393.882	858.182	1259.31
44.048	48	401.882	858.182	1248.31
44.0682	38	397.882	857.182	1259.31
44.0884	57	389.882	859.182	1259.31
44.1087	47	390.882	859.182	1254.31
44.1289	35	395.882	860.182	1266.31
44.1491	28	392.882	851.182	1255.31
44.1693	37	402.882	861.182	1262.31
44.1896	45	401.882	863.182	1254.31
44.2098	48	399.882	860.182	1264.31
44.23	43	395.882	854.182	1256.31
44.2503	57	403.882	851.182	1254.31
44.2705	47	394.882	859.182	1252.31
44.2907	34	399.882	866.182	1254.31
44.3109	32	401.882	853.182	1256.31
44.3312	47	398.882	861.182	1243.31
44.3514	41	395.882	860.182	1249.31
44.3716	57	399.882	858.182	1253.31
44.3919	35	386.882	853.182	1258.31
44.4121	38	406.882	860.182	1260.31
44.4323	45	397.882	861.182	1253.31
44.4526	29	391.882	850.182	1265.31
44.4728	31	392.882	866.182	1250.31
44.493	49	393.882	857.182	1256.31
44.5132	51	396.882	859.182	1259.31
44.5335	49	395.882	856.182	1248.31
44.5537	30	388.882	871.182	1258.31
44.5739	47	404.882	862.182	1257.31
44.5942	51	399.882	865.182	1257.31
44.6144	48	391.882	855.182	1251.31
44.6346	41	397.882	862.182	1261.31
44.6548	30	398.882	865.182	1250.31
44.6751	35	410.882	855.182	1255.31
44.6953	35	392.882	858.182	1252.31
44.7155	55	388.882	855.182	1247.31
44.7358	42	395.882	856.182	1246.31
44.756	49	395.882	860.182	1263.31
44.7762	41	398.882	861.182	1249.31
44.7965	46	387.882	857.182	1257.31
44.8167	46	396.882	853.182	1266.31
44.8369	45	395.882	859.182	1259.31
44.8571	35	396.882	852.182	1246.31
44.8774	35	394.882	859.182	1254.31
44.8976	43	393.882	865.182	1250.31
44.9178	31	395.882	858.182	1248.31
44.9381	43	396.882	854.182	1258.31
44.9583	42	390.882	855.182	1250.31
44.9785	33	390.882	851.182	1253.31
44.9987	50	405.882	850.182	1250.31
45.019	52	379.882	849.182	1258.31
45.0392	42	397.882	852.182	1256.31
45.0594	31	390.882	854.182	1251.31
45.0797	38	398.882	870.182	1259.31
45.0999	45	391.882	849.182	1267.31
45.1201	38	404.882	855.182	1255.31
45.1404	39	404.882	863.182	1256.31
45.1606	41	391.882	860.182	1260.31
45.1808	50	391.882	858.182	1252.31
45.201	45	395.882	850.182	1260.31
45.2213	39	394.882	858.182	1256.31
45.2415	40	397.882	871.182	1258.31
45.2617	41	402.882	858.182	1251.31
45.282	35	393.882	854.182	1250.31
45.3022	37	401.882	861.182	1257.31
45.3224	50	388.882	856.182	1260.31
45.3426	45	403.882	855.182	1252.31
45.3629	49	388.882	854.182	1261.31
45.3831	37	383.882	855.182	1255.31
45.4033	35	392.882	855.182	1250.31
45.4236	43	394.882	856.182	1261.31
45.4438	33	397.882	863.182	1260.31
45.464	33	387.882	858.182	1256.31
45.4843	35	393.882	858.182	1252.31
45.5045	42	388.882	858.182	1255.31
45.5247	45	401.882	844.182	1248.31
45.5449	31	390.882	856.182	1253.31
45.5652	37	396.882	863.182	1254.31
45.5854	37	398.882	862.182	1249.31
45.6056	40	395.882	856.182	1256.31
45.6259	53	398.882	852.182	1250.31
45.6461	40	386.882	852.182	1261.31
45.6663	42	385.882	859.182	1257.31
45.6865	32	384.882	857.182	1248.31
45.7068	34	389.882	858.182	1254.31
45.727	38	398.882	852.182	1253.31
45.7472	45	399.882	851.182	1250.31
45.7675	26	391.882	846.182	1265.31
45.7877	24	390.882	854.182	1256.31
45.8079	35	396.882	851.182	1248.31
45.8282	24	389.882	853.182	1256.31
45.8484	35	395.882	844.182	1260.31
45.8686	37	391.882	843.182	1249.31
45.8888	41	390.882	850.182	1252.31
45.9091	32	392.882	857.182	1255.31
45.9293	42	397.882	856.182	1255.31
45.9495	48	395.882	858.182	1252.31
45.9698	38	390.882	853.182	1251.31
45.99	31	393.882	857.182	1259.31
46.0102	29	390.882	847.182	1256.31
46.0304	32	394.882	853.182	1260.31
46.0507	43	399.882	852.182	1260.31
46.0709	29	390.882	860.182	1260.31
46.0911	26	407.882	858.182	1257.31
46.1114	46	392.882	864.182	1256.31
46.1316	39	400.882	854.182	1260.31
46.1518	40	382.882	858.182	1247.31
46.1721	35	391.882	856.182	1261.31
46.1923	44	384.882	851.182	1253.31
46.2125	46	391.882	862.182	1261.31
46.2327	30	392.882	849.182	1255.31
46.253	44	392.882	855.182	1257.31
46.2732	30	394.882	850.182	1254.31
46.2934	43	394.882	853.182	1253.31
46.3137	35	394.882	857.182	1256.31
46.3339	35	390.882	855.182	1261.31
46.3541	43	396.882	855.182	1258.31
46.3743	31	390.882	853.182	1257.31
46.3946	31	397.882	852.182	1252.31
46.4148	37	388.882	851.182	1251.31
46.435	29	392.882	843.182	1254.31
46.4553	29	395.882	854.182	1250.31
46.4755	29	391.882	859.182	1255.31
46.4957	33	395.882	858.182	1266.31
46.516	33	395.882	850.182	1263.31
46.5362	36	398.882	848.182	1256.31
46.5564	32	395.882	860.182	1250.31
46.5766	28	391.882	856.182	1249.31
46.5969	38	391.882	854.182	1252.31
46.6171	43	400.882	856.182	1260.31
46.6373	28	392.882	863.182	1252.31
46.6576	26	399.882	858.182	1262.31
46.6778	27	392.882	854.182	1255.31
46.698	34	397.882	851.182	1263.31
46.7182	35	393.882	859.182	1248.31
46.7385	29	387.882	851.182	1258.31
46.7587	41	395.882	860.182	1254.31
46.7789	24	382.882	861.182	1257.31
46.7992	37	400.882	864.182	1256.31
46.8194	34	391.882	849.182	1254.31
46.8396	39	393.882	856.182	1257.31
46.8599	35	388.882	851.182	1260.31
46.8801	49	395.882	850.182	1251.31
46.9003	32	392.882	856.182	1258.31
46.9205	27	392.882	850.182	1252.31
46.9408	38	397.882	857.182	1255.31
46.961	42	397.882	857.182	1258.31
46.9812	27	399.882	857.182	1257.31
47.0015	31	395.882	849.182	1253.31
47.0217	45	395.882	859.182	1267.31
47.0419	28	396.882	843.182	1255.31
47.0621	35	395.882	850.182	1266.31
47.0824	33	394.882	857.182	1249.31
47.1026	38	398.882	857.182	1261.31
47.1228	24	396.882	855.182	1255.31
47.1431	45	397.882	854.182	1261.31
47.1633	29	392.882	858.182	1253.31
47.1835	37	387.882	850.182	1250.31
47.2038	28	391.882	857.182	1256.31
47.224	41	400.882	846.182	1264.31
47.2442	36	389.882	855.182	1253.31
47.2644	33	403.882	860.182	1257.31
47.2847	37	396.882	857.182	1254.31
47.3049	45	398.882	850.182	1259.31
47.3251	31	394.882	856.182	1256.31
47.3454	44	396.882	855.182	1258.31
47.3656	37	388.882	865.182	1257.31
47.3858	41	387.882	855.182	1249.31
47.406	36	385.882	861.182	1247.31
47.4263	32	393.882	854.182	1253.31
47.4465	37	393.882	853.182	1256.31
47.4667	34	395.882	847.182	1252.31
47.487	31	389.882	857.182	1254.31
47.5072	46	386.882	856.182	1259.31
47.5274	37	394.882	858.182	1258.31
47.5477	28	387.882	852.182	1252.31
47.5679	35	394.882	854.182	1261.31
47.5881	31	398.882	851.182	1257.31
47.6083	41	389.882	849.182	1255.31
47.6286	49	392.882	857.182	1253.31
47.6488	50	389.882	852.182	1247.31
47.669	34	392.882	852.182	1257.31
47.6893	34	400.882	866.182	1256.31
47.7095	33	394.882	853.182	1257.31
47.7297	32	396.882	848.182	1249.31
47.7499	27	389.882	863.182	1261.31
47.7702	35	393.882	853.182	1253.31
47.7904	46	392.882	850.182	1251.31
47.8106	24	390.882	855.182	1257.31
47.8309	44	397.882	857.182	1253.31
47.8511	34	396.882	850.182	1266.31
47.8713	30	399.882	856.182	1258.31
47.8916	34	389.882	847.182	1260.31
47.9118	36	396.882	854.182	1257.31
47.932	33	393.882	858.182	1257.31
47.9522	37	398.882	846.182	1262.31
47.9725	24	394.882	855.182	1264.31
47.9927	31	393.882	857.182	1249.31
48.0129	36	400.882	856.182	1253.31
48.0332	31	398.882	850.182	1260.31
48.0534	37	395.882	855.182	1259.31
48.0736	35	392.882	852.182	1258.31
48.0938	26	386.882	850.182	1257.31
48.1141	33	394.882	857.182	1257.31
48.1343	38	393.882	849.182	1255.31
48.1545	35	394.882	859.182	1252.31
48.1748	43	388.882	855.182	1251.31
48.195	34	392.882	850.182	1256.31
48.2152	33	393.882	857.182	1252.31
48.2355	48	396.882	856.182	1257.31
48.2557	30	388.882	855.182	1261.31
48.2759	36	393.882	852.182	1256.31
48.2961	42	393.882	854.182	1254.31
48.3164	35	400.882	862.182	1256.31
48.3366	29	402.882	845.182	1251.31
48.3568	37	391.882	861.182	1259.31
48.3771	34	392.882	856.182	1255.31
48.3973	42	392.882	858.182	1250.31
48.4175	35	389.882	855.182	1256.31
48.4377	33	391.882	858.182	1249.31
48.458	33	393.882	854.182	1264.31
48.4782	34	389.882	850.182	1257.31
48.4984	34	389.882	850.182	1246.31
48.5187	38	387.882	856.182	1256.31
48.5389	36	392.882	869.182	1251.31
48.5591	26	384.882	849.182	1254.31
48.5794	28	401.882	854.182	1259.31
48.5996	26	394.882	858.182	1261.31
48.6198	38	392.882	844.182	1257.31
48.64	30	390.882	858.182	1254.31
48.6603	34	390.882	851.182	1249.31
48.6805	31	392.882	847.182	1256.31
48.7007	41	393.882	857.182	1253.31
48.721	37	395.882	851.182	1251.31
48.7412	43	393.882	858.182	1255.31
48.7614	26	388.882	853.182	1260.31
48.7816	40	391.882	849.182	1249.31
48.8019	35	402.882	850.182	1251.31
48.8221	39	395.882	857.182	1254.31
48.8423	32	397.882	857.182	1251.31
48.8626	36	392.882	853.182	1251.31
48.8828	37	391.882	855.182	1252.31
48.903	29	395.882	855.182	1250.31
48.9233	46	386.882	846.182	1252.31
48.9435	26	389.882	854.182	1257.31
48.9637	28	392.882	848.182	1259.31
48.9839	46	384.882	861.182	1246.31
49.0042	42	388.882	862.182	1260.31
49.0244	41	387.882	852.182	1254.31
49.0446	32	389.882	856.182	1254.31
49.0649	31	393.882	865.182	1255.31
49.0851	43	393.882	855.182	1245.31
49.1053	37	391.882	858.182	1260.31
49.1255	40	391.882	860.182	1248.31
49.1458	42	386.882	854.182	1257.31
49.166	21	390.882	852.182	1255.31
49.1862	33	391.882	852.182	1255.31
49.2065	24	395.882	856.182	1251.31
49.2267	36	384.882	850.182	1262.31
49.2469	29	391.882	853.182	1259.31
49.2672	27	389.882	849.182	1255.31
49.2874	41	391.882	849.182	1250.31
49.3076	37	391.882	853.182	1253.31
49.3278	27	391.882	852.182	1257.31
49.3481	33	383.882	852.182	1255.31
49.3683	31	399.882	849.182	1256.31
49.3885	42	385.882	851.182	1257.31
49.4088	36	388.882	852.182	1255.31
49.429	41	392.882	846.182	1259.31
49.4492	39	388.882	855.182	1252.31
49.4694	30	395.882	844.182	1262.31
49.4897	37	391.882	857.182	1251.31
49.5099	31	395.882	847.182	1255.31
49.5301	39	384.882	848.182	1259.31
49.5504	32	388.882	847.182	1253.31
49.5706	37	387.882	846.182	1267.31
49.5908	34	391.882	855.182	1258.31
49.6111	31	401.882	855.182	1264.31
49.6313	34	394.882	858.182	1256.31
49.6515	31	386.882	852.182	1254.31
49.6717	37	393.882	851.182	1260.31
49.692	27	394.882	851.182	1259.31
49.7122	36	383.882	855.182	1251.31
49.7324	35	388.882	856.182	1254.31
49.7527	27	391.882	849.182	1250.31
49.7729	41	383.882	859.182	1253.31
49.7931	37	396.882	860.182	1255.31
49.8133	40	392.882	849.182	1266.31
49.8336	26	387.882	857.182	1250.31
49.8538	37	391.882	851.182	1252.31
49.874	33	393.882	859.182	1255.31
49.8943	35	394.882	855.182	1259.31
49.9145	41	396.882	856.182	1247.31
49.9347	31	396.882	853.182	1255.31
49.955	39	387.882	856.182	1262.31
49.9752	35	387.882	854.182	1251.31
49.9954	32	398.882	864.182	1253.31
50.0156	28	394.882	861.182	1248.31
50.0359	32	392.882	856.182	1257.31
50.0561	23	395.882	846.182	1247.31
50.0763	35	388.882	858.182	1251.31
50.0966	25	391.882	856.182	1249.31
50.1168	37	399.882	855.182	1255.31
50.137	44	392.882	848.182	1253.31
50.1572	36	390.882	856.182	1251.31
50.1775	31	391.882	849.182	1262.31
50.1977	33	391.882	854.182	1254.31
50.2179	26	399.882	848.182	1253.31
50.2382	32	398.882	850.182	1251.31
50.2584	39	400.882	856.182	1254.31
50.2786	29	398.882	849.182	1256.31
50.2989	30	398.882	849.182	1256.31
50.3191	26	393.882	858.182	1256.31
50.3393	42	388.882	858.182	1261.31
50.3595	42	393.882	856.182	1260.31
50.3798	45	391.882	856.182	1258.31
50.4	40	391.882	856.182	1259.31
[truncated: 1,958 more rows]

## Sheet: Fig4(d)
2θ	Intensity	Intensity
°	a.u.	a.u.
1.6μm Graphite	1.6μm Graphite	36μm Graphite
Intensity is moved vertically by 156.45371577575
10.0221	147	506.442
10.0423	140	505.442
10.0625	144	514.442
10.0828	146	507.442
10.103	120	520.442
10.1232	122	514.442
10.1435	111	509.442
10.1637	138	498.442
10.1839	118	517.442
10.2042	106	524.442
10.2244	107	533.442
10.2446	123	506.442
10.2648	133	515.442
10.2851	121	517.442
10.3053	121	500.442
10.3255	141	521.442
10.3458	117	508.442
10.366	108	498.442
10.3862	124	498.442
10.4064	120	551.442
10.4267	143	524.442
10.4469	119	501.442
10.4671	138	510.442
10.4874	125	506.442
10.5076	120	514.442
10.5278	125	522.442
10.5481	120	507.442
10.5683	145	499.442
10.5885	114	507.442
10.6087	124	504.442
10.629	152	499.442
10.6492	102	508.442
10.6694	110	504.442
10.6897	125	535.442
10.7099	121	504.442
10.7301	142	510.442
10.7503	126	491.442
10.7706	135	505.442
10.7908	121	524.442
10.811	117	506.442
10.8313	122	498.442
10.8515	122	526.442
10.8717	135	507.442
10.892	131	515.442
10.9122	104	506.442
10.9324	110	491.442
10.9526	101	501.442
10.9729	139	515.442
10.9931	123	510.442
11.0133	114	508.442
11.0336	101	518.442
11.0538	112	510.442
11.074	120	516.442
11.0942	112	511.442
11.1145	122	514.442
11.1347	113	528.442
11.1549	99	486.442
11.1752	112	490.442
11.1954	137	505.442
11.2156	111	511.442
11.2359	111	519.442
11.2561	102	499.442
11.2763	126	501.442
11.2965	109	493.442
11.3168	116	524.442
11.337	117	501.442
11.3572	119	511.442
11.3775	125	494.442
11.3977	111	511.442
11.4179	96	505.442
11.4381	113	521.442
11.4584	107	503.442
11.4786	101	516.442
11.4988	127	512.442
11.5191	110	493.442
11.5393	106	509.442
11.5595	106	500.442
11.5798	103	520.442
11.6	102	497.442
11.6202	104	494.442
11.6404	123	501.442
11.6607	123	505.442
11.6809	95	490.442
11.7011	104	494.442
11.7214	126	509.442
11.7416	90	517.442
11.7618	105	500.442
11.782	112	507.442
11.8023	95	495.442
11.8225	97	506.442
11.8427	91	504.442
11.863	112	503.442
11.8832	119	474.442
11.9034	95	484.442
11.9237	113	495.442
11.9439	77	479.442
11.9641	107	508.442
11.9843	108	496.442
12.0046	105	517.442
12.0248	105	505.442
12.045	94	498.442
12.0653	102	486.442
12.0855	107	493.442
12.1057	128	485.442
12.1259	102	487.442
12.1462	126	503.442
12.1664	116	496.442
12.1866	114	498.442
12.2069	109	492.442
12.2271	89	499.442
12.2473	88	504.442
12.2676	103	504.442
12.2878	90	505.442
12.308	88	504.442
12.3282	117	493.442
12.3485	98	494.442
12.3687	92	495.442
12.3889	90	493.442
12.4092	87	483.442
12.4294	106	486.442
12.4496	91	496.442
12.4698	96	501.442
12.4901	84	498.442
12.5103	107	505.442
12.5305	109	498.442
12.5508	93	490.442
12.571	103	483.442
12.5912	94	490.442
12.6115	92	498.442
12.6317	85	506.442
12.6519	102	500.442
12.6721	97	509.442
12.6924	82	500.442
12.7126	129	523.442
12.7328	91	513.442
12.7531	99	500.442
12.7733	106	496.442
12.7935	118	485.442
12.8137	110	482.442
12.834	127	509.442
12.8542	103	495.442
12.8744	122	506.442
12.8947	130	506.442
12.9149	106	524.442
12.9351	103	520.442
12.9554	126	507.442
12.9756	131	517.442
12.9958	124	545.442
13.016	141	547.442
13.0363	157	525.442
13.0565	164	548.442
13.0767	195	595.442
13.097	215	590.442
13.1172	261	588.442
13.1374	241	596.442
13.1576	302	656.442
13.1779	346	640.442
13.1981	372	687.442
13.2183	458	768.442
13.2386	440	824.442
13.2588	527	860.442
13.279	560	993.442
13.2993	537	1143.44
13.3195	485	1267.44
13.3397	402	1515.44
13.3599	328	1773.44
13.3802	295	2008.44
13.4004	189	2255.44
13.4206	151	2517.44
13.4409	119	2720.44
13.4611	118	2562.44
13.4813	104	2234.44
13.5015	108	1689.44
13.5218	94	1291.44
13.542	110	938.442
13.5622	100	695.442
13.5825	83	632.442
13.6027	100	562.442
13.6229	97	543.442
13.6432	90	533.442
13.6634	86	526.442
13.6836	92	536.442
13.7038	90	532.442
13.7241	78	525.442
13.7443	76	523.442
13.7645	84	517.442
13.7848	84	511.442
13.805	69	525.442
13.8252	96	494.442
13.8454	73	493.442
13.8657	88	504.442
13.8859	95	496.442
13.9061	92	511.442
13.9264	66	484.442
13.9466	86	486.442
13.9668	72	509.442
13.9871	92	483.442
14.0073	78	489.442
14.0275	69	504.442
14.0477	75	501.442
14.068	91	488.442
14.0882	78	480.442
14.1084	115	514.442
14.1287	76	495.442
14.1489	60	481.442
14.1691	91	492.442
14.1893	79	492.442
14.2096	66	490.442
14.2298	96	479.442
14.25	91	499.442
14.2703	87	486.442
14.2905	69	481.442
14.3107	63	481.442
14.331	72	494.442
14.3512	74	480.442
14.3714	91	495.442
14.3916	78	481.442
14.4119	77	487.442
14.4321	80	478.442
14.4523	78	492.442
14.4726	69	486.442
14.4928	64	476.442
14.513	86	472.442
14.5332	87	472.442
14.5535	70	504.442
14.5737	81	483.442
14.5939	58	471.442
14.6142	86	474.442
14.6344	61	490.442
14.6546	76	486.442
14.6749	70	481.442
14.6951	73	483.442
14.7153	85	486.442
14.7355	72	479.442
14.7558	71	475.442
14.776	82	475.442
14.7962	74	472.442
14.8165	74	491.442
14.8367	81	490.442
14.8569	95	479.442
14.8771	63	477.442
14.8974	91	483.442
14.9176	69	475.442
14.9378	85	487.442
14.9581	65	488.442
14.9783	86	485.442
14.9985	66	489.442
15.0188	67	482.442
15.039	74	477.442
15.0592	75	478.442
15.0794	77	478.442
15.0997	69	474.442
15.1199	92	478.442
15.1401	71	479.442
15.1604	81	488.442
15.1806	64	483.442
15.2008	96	467.442
15.221	86	481.442
15.2413	75	477.442
15.2615	73	478.442
15.2817	69	469.442
15.302	88	484.442
15.3222	65	472.442
15.3424	87	473.442
15.3627	64	487.442
15.3829	86	473.442
15.4031	85	486.442
15.4233	77	466.442
15.4436	77	464.442
15.4638	97	468.442
15.484	82	488.442
15.5043	74	478.442
15.5245	71	493.442
15.5447	76	467.442
15.5649	96	481.442
15.5852	71	492.442
15.6054	53	490.442
15.6256	71	469.442
15.6459	76	474.442
15.6661	66	465.442
15.6863	68	474.442
15.7066	72	470.442
15.7268	70	478.442
15.747	57	459.442
15.7672	56	475.442
15.7875	66	471.442
15.8077	58	490.442
15.8279	79	463.442
15.8482	72	479.442
15.8684	66	483.442
15.8886	65	469.442
15.9088	71	480.442
15.9291	64	476.442
15.9493	75	482.442
15.9695	70	465.442
15.9898	80	479.442
16.01	75	477.442
16.0302	58	457.442
16.0505	70	480.442
16.0707	63	462.442
16.0909	70	484.442
16.1111	76	465.442
16.1314	75	476.442
16.1516	65	468.442
16.1718	59	466.442
16.1921	76	479.442
16.2123	78	484.442
16.2325	85	478.442
16.2527	58	477.442
16.273	67	470.442
16.2932	53	468.442
16.3134	82	472.442
16.3337	63	464.442
16.3539	53	469.442
16.3741	60	473.442
16.3944	73	477.442
16.4146	75	474.442
16.4348	59	473.442
16.455	62	467.442
16.4753	59	468.442
16.4955	64	472.442
16.5157	63	467.442
16.536	51	465.442
16.5562	68	456.442
16.5764	60	472.442
16.5966	67	473.442
16.6169	71	468.442
16.6371	77	479.442
16.6573	77	470.442
16.6776	63	471.442
16.6978	77	475.442
16.718	65	477.442
16.7383	54	472.442
16.7585	57	464.442
16.7787	61	478.442
16.7989	50	472.442
16.8192	49	474.442
16.8394	87	492.442
16.8596	58	474.442
16.8799	66	467.442
16.9001	55	475.442
16.9203	76	479.442
16.9405	57	459.442
16.9608	74	465.442
16.981	59	485.442
17.0012	75	468.442
17.0215	59	480.442
17.0417	62	472.442
17.0619	57	473.442
17.0822	62	463.442
17.1024	64	466.442
17.1226	54	476.442
17.1428	69	466.442
17.1631	72	462.442
17.1833	54	465.442
17.2035	68	477.442
17.2238	68	481.442
17.244	77	484.442
17.2642	64	470.442
17.2844	57	470.442
17.3047	55	480.442
17.3249	60	478.442
17.3451	65	464.442
17.3654	60	468.442
17.3856	45	474.442
17.4058	66	469.442
17.4261	68	466.442
17.4463	61	458.442
17.4665	66	453.442
17.4867	78	475.442
17.507	56	459.442
17.5272	52	464.442
17.5474	47	465.442
17.5677	65	464.442
17.5879	74	472.442
17.6081	74	465.442
17.6283	62	467.442
17.6486	59	459.442
17.6688	50	464.442
17.689	34	469.442
17.7093	47	475.442
17.7295	54	447.442
17.7497	69	469.442
17.77	60	476.442
17.7902	58	465.442
17.8104	57	464.442
17.8306	53	477.442
17.8509	72	468.442
17.8711	73	475.442
17.8913	72	465.442
17.9116	45	478.442
17.9318	68	463.442
17.952	53	474.442
17.9722	57	466.442
17.9925	59	478.442
18.0127	56	471.442
18.0329	47	477.442
18.0532	52	474.442
18.0734	55	467.442
18.0936	62	460.442
18.1139	50	471.442
18.1341	60	459.442
18.1543	59	458.442
18.1745	39	466.442
18.1948	63	463.442
18.215	63	491.442
18.2352	58	451.442
18.2555	48	466.442
18.2757	61	466.442
18.2959	45	461.442
18.3161	63	468.442
18.3364	50	459.442
18.3566	53	464.442
18.3768	58	458.442
18.3971	60	482.442
18.4173	53	463.442
18.4375	55	471.442
18.4578	42	449.442
18.478	58	460.442
18.4982	51	461.442
18.5184	50	458.442
18.5387	66	458.442
18.5589	59	462.442
18.5791	62	468.442
18.5994	58	466.442
18.6196	61	459.442
18.6398	62	460.442
18.66	47	457.442
18.6803	44	469.442
18.7005	55	465.442
18.7207	56	454.442
18.741	64	479.442
18.7612	57	462.442
18.7814	40	453.442
18.8017	45	460.442
18.8219	55	463.442
18.8421	44	468.442
18.8623	59	456.442
18.8826	44	462.442
18.9028	55	462.442
18.923	73	467.442
18.9433	50	449.442
18.9635	57	460.442
18.9837	40	462.442
19.0039	60	464.442
19.0242	56	460.442
19.0444	49	464.442
19.0646	62	454.442
19.0849	49	460.442
19.1051	61	465.442
19.1253	48	461.442
19.1456	49	474.442
19.1658	53	451.442
19.186	49	464.442
19.2062	53	450.442
19.2265	44	464.442
19.2467	55	443.442
19.2669	62	472.442
19.2872	62	468.442
19.3074	54	466.442
19.3276	53	471.442
19.3478	51	455.442
19.3681	52	470.442
19.3883	45	461.442
19.4085	48	463.442
19.4288	47	466.442
19.449	75	463.442
19.4692	49	455.442
19.4895	59	466.442
19.5097	59	455.442
19.5299	52	475.442
19.5501	65	446.442
19.5704	51	476.442
19.5906	55	469.442
19.6108	61	468.442
19.6311	51	457.442
19.6513	62	453.442
19.6715	47	472.442
19.6917	54	451.442
19.712	48	463.442
19.7322	60	447.442
19.7524	48	459.442
19.7727	57	469.442
19.7929	57	462.442
19.8131	59	448.442
19.8334	40	466.442
19.8536	46	467.442
19.8738	60	468.442
19.894	44	454.442
19.9143	50	462.442
19.9345	40	462.442
19.9547	60	472.442
19.975	54	463.442
19.9952	50	462.442
20.0154	38	461.442
20.0356	49	462.442
20.0559	52	463.442
20.0761	46	466.442
20.0963	42	456.442
20.1166	47	465.442
20.1368	55	461.442
20.157	52	465.442
20.1773	53	457.442
20.1975	49	481.442
20.2177	59	451.442
20.2379	51	458.442
20.2582	57	456.442
20.2784	33	471.442
20.2986	37	459.442
20.3189	53	453.442
20.3391	52	448.442
20.3593	35	463.442
20.3795	52	467.442
20.3998	60	456.442
20.42	40	457.442
20.4402	65	458.442
20.4605	54	463.442
20.4807	41	451.442
20.5009	48	460.442
20.5212	40	459.442
20.5414	48	465.442
20.5616	39	455.442
20.5818	43	451.442
20.6021	55	459.442
20.6223	47	471.442
20.6425	39	456.442
20.6628	41	450.442
20.683	50	464.442
20.7032	38	460.442
20.7234	41	469.442
20.7437	47	466.442
20.7639	46	467.442
20.7841	54	458.442
20.8044	51	456.442
20.8246	45	446.442
20.8448	41	465.442
20.8651	48	452.442
20.8853	43	458.442
20.9055	43	448.442
20.9257	47	469.442
20.946	48	467.442
20.9662	49	453.442
20.9864	44	452.442
21.0067	45	459.442
21.0269	42	448.442
21.0471	52	451.442
21.0673	39	453.442
21.0876	61	457.442
21.1078	60	450.442
21.128	49	453.442
21.1483	45	467.442
21.1685	48	453.442
21.1887	29	454.442
21.209	46	451.442
21.2292	36	462.442
21.2494	56	443.442
21.2696	46	459.442
21.2899	35	469.442
21.3101	56	459.442
21.3303	52	455.442
21.3506	51	459.442
21.3708	44	445.442
21.391	43	466.442
21.4112	52	463.442
21.4315	57	450.442
21.4517	55	459.442
21.4719	32	454.442
21.4922	41	445.442
21.5124	50	460.442
21.5326	36	455.442
21.5529	47	457.442
21.5731	45	449.442
21.5933	44	449.442
21.6135	53	462.442
21.6338	41	456.442
21.654	42	469.442
21.6742	47	450.442
21.6945	40	449.442
21.7147	48	454.442
21.7349	35	450.442
21.7551	40	461.442
21.7754	40	461.442
21.7956	43	450.442
21.8158	57	453.442
21.8361	41	457.442
21.8563	53	454.442
21.8765	45	451.442
21.8968	46	463.442
21.917	45	455.442
21.9372	45	460.442
21.9574	44	442.442
21.9777	40	456.442
21.9979	52	449.442
22.0181	44	445.442
22.0384	45	446.442
22.0586	42	451.442
22.0788	38	455.442
22.099	46	453.442
22.1193	42	455.442
22.1395	39	465.442
22.1597	30	463.442
22.18	39	456.442
22.2002	35	454.442
22.2204	34	464.442
22.2407	49	451.442
22.2609	40	456.442
22.2811	43	468.442
22.3013	31	463.442
22.3216	33	456.442
22.3418	37	447.442
22.362	43	457.442
22.3823	61	452.442
22.4025	41	460.442
22.4227	46	453.442
22.4429	47	457.442
22.4632	53	454.442
22.4834	45	466.442
22.5036	44	454.442
22.5239	39	467.442
22.5441	40	457.442
22.5643	41	455.442
22.5846	46	454.442
22.6048	51	453.442
22.625	38	479.442
22.6452	48	449.442
22.6655	41	466.442
22.6857	38	470.442
22.7059	59	471.442
22.7262	61	462.442
22.7464	57	471.442
22.7666	50	460.442
22.7868	31	457.442
22.8071	60	466.442
22.8273	48	470.442
22.8475	55	468.442
22.8678	50	462.442
22.888	50	476.442
22.9082	62	472.442
22.9285	42	475.442
22.9487	50	480.442
22.9689	63	485.442
22.9891	75	480.442
23.0094	70	473.442
23.0296	100	484.442
23.0498	100	491.442
23.0701	135	502.442
23.0903	161	487.442
23.1105	202	501.442
23.1307	249	516.442
23.151	314	529.442
23.1712	320	569.442
23.1914	367	586.442
23.2117	434	650.442
23.2319	474	712.442
23.2521	443	818.442
23.2724	435	987.442
23.2926	369	1245.44
23.3128	316	1613.44
23.333	239	1938.44
23.3533	152	2289.44
23.3735	94	2585.44
23.3937	81	2753.44
23.414	66	2616.44
23.4342	65	2131.44
23.4544	52	1734.44
23.4746	38	1290.44
23.4949	49	912.442
23.5151	40	696.442
23.5353	53	580.442
23.5556	42	537.442
23.5758	43	525.442
23.596	47	491.442
23.6163	48	494.442
23.6365	39	487.442
23.6567	41	487.442
23.6769	48	483.442
23.6972	50	478.442
23.7174	41	485.442
23.7376	42	478.442
23.7579	35	453.442
23.7781	41	461.442
23.7983	46	467.442
23.8185	45	460.442
23.8388	40	462.442
23.859	42	462.442
23.8792	33	454.442
23.8995	46	457.442
23.9197	23	448.442
23.9399	33	458.442
23.9602	51	454.442
23.9804	30	449.442
24.0006	40	452.442
24.0208	36	452.442
24.0411	34	468.442
24.0613	42	454.442
24.0815	47	449.442
24.1018	41	453.442
24.122	44	446.442
24.1422	45	451.442
24.1624	31	461.442
24.1827	55	465.442
24.2029	45	450.442
24.2231	41	455.442
24.2434	35	455.442
24.2636	43	465.442
24.2838	36	466.442
24.3041	47	454.442
24.3243	47	447.442
24.3445	35	458.442
24.3647	49	458.442
24.385	42	455.442
24.4052	38	454.442
24.4254	47	441.442
24.4457	22	446.442
24.4659	47	453.442
24.4861	48	447.442
24.5063	35	446.442
24.5266	38	457.442
24.5468	39	449.442
24.567	54	450.442
24.5873	33	459.442
24.6075	37	461.442
24.6277	25	447.442
24.648	39	452.442
24.6682	39	451.442
24.6884	41	450.442
24.7086	59	452.442
24.7289	26	452.442
24.7491	34	437.442
24.7693	33	441.442
24.7896	25	453.442
24.8098	36	440.442
24.83	41	440.442
24.8502	47	451.442
24.8705	32	453.442
24.8907	50	447.442
24.9109	38	458.442
24.9312	42	451.442
24.9514	39	448.442
24.9716	39	457.442
24.9919	49	452.442
25.0121	35	454.442
25.0323	32	454.442
25.0525	38	449.442
25.0728	32	464.442
25.093	40	448.442
25.1132	37	447.442
25.1335	33	447.442
25.1537	43	457.442
25.1739	44	452.442
25.1941	34	441.442
25.2144	48	454.442
25.2346	32	450.442
25.2548	42	445.442
25.2751	34	458.442
25.2953	27	455.442
25.3155	33	461.442
25.3358	30	456.442
25.356	32	449.442
25.3762	35	451.442
25.3964	43	443.442
25.4167	39	451.442
25.4369	36	450.442
25.4571	28	451.442
25.4774	40	468.442
25.4976	35	458.442
25.5178	36	469.442
25.538	30	457.442
25.5583	33	454.442
25.5785	53	447.442
25.5987	28	446.442
25.619	49	447.442
25.6392	39	448.442
25.6594	38	449.442
25.6797	35	448.442
25.6999	38	443.442
25.7201	41	443.442
25.7403	39	446.442
25.7606	48	445.442
25.7808	43	461.442
25.801	42	449.442
25.8213	41	451.442
25.8415	40	448.442
25.8617	40	452.442
25.8819	31	449.442
25.9022	33	457.442
25.9224	29	447.442
25.9426	36	449.442
25.9629	43	450.442
25.9831	40	452.442
26.0033	59	457.442
26.0236	36	448.442
26.0438	41	456.442
26.064	33	449.442
26.0842	38	462.442
26.1045	35	472.442
26.1247	41	454.442
26.1449	42	460.442
26.1652	48	465.442
26.1854	47	468.442
26.2056	39	471.442
26.2258	38	473.442
26.2461	44	467.442
26.2663	47	465.442
26.2865	42	474.442
26.3068	30	461.442
26.327	39	465.442
26.3472	27	470.442
26.3675	41	472.442
26.3877	55	479.442
26.4079	45	494.442
26.4281	57	479.442
26.4484	42	477.442
26.4686	52	465.442
26.4888	60	498.442
26.5091	54	496.442
26.5293	47	489.442
26.5495	54	486.442
26.5697	65	498.442
26.59	66	515.442
26.6102	79	487.442
26.6304	80	498.442
26.6507	117	524.442
26.6709	124	526.442
26.6911	147	517.442
26.7114	154	530.442
26.7316	215	541.442
26.7518	239	540.442
26.772	340	563.442
26.7923	461	572.442
26.8125	579	609.442
26.8327	639	626.442
26.853	811	722.442
26.8732	981	779.442
26.8934	1119	905.442
26.9136	1216	1114.44
26.9339	1210	1355.44
26.9541	1103	1831.44
26.9743	962	2412.44
26.9946	817	3217.44
27.0148	565	4236.44
27.035	396	5333.44
27.0553	263	6384.44
27.0755	177	6688.44
27.0957	140	6160.44
27.1159	99	5096.44
27.1362	69	4108.44
27.1564	69	2911.44
27.1766	59	2120.44
27.1969	58	1381.44
27.2171	49	890.442
27.2373	41	687.442
27.2575	45	621.442
27.2778	46	568.442
27.298	34	569.442
27.3182	48	560.442
27.3385	42	550.442
27.3587	44	558.442
27.3789	41	521.442
27.3992	36	538.442
27.4194	40	513.442
27.4396	38	489.442
27.4598	41	495.442
27.4801	45	481.442
27.5003	25	495.442
27.5205	31	466.442
27.5408	40	474.442
27.561	44	485.442
27.5812	33	474.442
27.6014	36	469.442
27.6217	40	468.442
27.6419	34	472.442
27.6621	40	476.442
27.6824	30	461.442
27.7026	38	453.442
27.7228	29	485.442
27.7431	48	464.442
27.7633	37	460.442
27.7835	39	454.442
27.8037	34	476.442
27.824	36	458.442
27.8442	41	474.442
27.8644	37	457.442
27.8847	41	460.442
27.9049	31	459.442
27.9251	34	460.442
27.9453	33	450.442
27.9656	47	460.442
27.9858	44	451.442
28.006	46	460.442
28.0263	33	459.442
28.0465	37	465.442
28.0667	38	469.442
28.087	37	457.442
28.1072	40	453.442
28.1274	39	456.442
28.1476	38	455.442
28.1679	31	465.442
28.1881	38	445.442
28.2083	48	448.442
28.2286	31	451.442
28.2488	31	453.442
28.269	41	436.442
28.2892	27	463.442
28.3095	26	448.442
28.3297	35	464.442
28.3499	37	451.442
28.3702	42	473.442
28.3904	39	461.442
28.4106	23	457.442
28.4309	43	465.442
28.4511	40	463.442
28.4713	21	460.442
28.4915	48	458.442
28.5118	39	460.442
28.532	43	462.442
28.5522	40	474.442
28.5725	33	455.442
28.5927	35	459.442
28.6129	40	461.442
28.6331	39	453.442
28.6534	35	447.442
28.6736	35	443.442
28.6938	25	450.442
28.7141	26	450.442
28.7343	34	444.442
28.7545	43	443.442
28.7748	34	446.442
28.795	32	446.442
28.8152	34	458.442
28.8354	35	452.442
28.8557	27	441.442
28.8759	27	445.442
28.8961	30	455.442
28.9164	26	443.442
28.9366	29	451.442
28.9568	35	460.442
28.977	28	445.442
28.9973	44	447.442
29.0175	29	446.442
29.0377	31	456.442
29.058	35	432.442
29.0782	36	462.442
29.0984	32	449.442
29.1187	31	443.442
29.1389	31	447.442
29.1591	38	453.442
29.1793	37	449.442
29.1996	30	445.442
29.2198	44	452.442
29.24	30	449.442
29.2603	39	447.442
29.2805	34	435.442
29.3007	26	440.442
29.3209	37	447.442
29.3412	45	443.442
29.3614	30	441.442
29.3816	31	444.442
29.4019	51	449.442
29.4221	43	443.442
29.4423	32	447.442
29.4626	35	447.442
29.4828	30	449.442
29.503	28	452.442
29.5232	33	441.442
29.5435	37	437.442
29.5637	40	444.442
29.5839	23	459.442
29.6042	32	451.442
29.6244	32	440.442
29.6446	30	441.442
29.6648	38	449.442
29.6851	35	440.442
29.7053	28	442.442
29.7255	30	451.442
29.7458	27	448.442
29.766	38	453.442
29.7862	35	447.442
29.8065	34	445.442
29.8267	31	458.442
29.8469	33	440.442
29.8671	24	444.442
29.8874	36	443.442
29.9076	29	439.442
29.9278	35	438.442
29.9481	33	445.442
29.9683	29	454.442
29.9885	46	444.442
30.0087	21	442.442
30.029	30	451.442
30.0492	30	443.442
30.0694	26	445.442
30.0897	37	443.442
30.1099	27	436.442
30.1301	36	449.442
30.1504	29	448.442
30.1706	28	446.442
30.1908	44	447.442
30.211	32	444.442
30.2313	37	444.442
30.2515	30	441.442
30.2717	27	444.442
30.292	46	458.442
30.3122	28	452.442
30.3324	28	443.442
30.3526	33	451.442
30.3729	31	451.442
30.3931	37	435.442
30.4133	42	447.442
30.4336	31	450.442
30.4538	37	451.442
30.474	29	452.442
30.4943	33	446.442
30.5145	29	436.442
30.5347	30	450.442
30.5549	30	448.442
30.5752	28	441.442
30.5954	33	452.442
30.6156	32	449.442
30.6359	36	443.442
30.6561	41	447.442
30.6763	34	446.442
30.6965	29	455.442
30.7168	29	445.442
30.737	27	450.442
30.7572	34	451.442
30.7775	33	446.442
30.7977	25	442.442
30.8179	25	456.442
30.8382	29	440.442
30.8584	35	445.442
30.8786	40	443.442
30.8988	28	448.442
30.9191	28	443.442
30.9393	37	454.442
30.9595	34	449.442
30.9798	34	450.442
31	34	444.442
31.0202	34	456.442
31.0404	28	451.442
31.0607	34	449.442
31.0809	38	446.442
31.1011	34	451.442
31.1214	26	439.442
31.1416	42	450.442
31.1618	42	443.442
31.1821	33	439.442
31.2023	27	443.442
31.2225	28	456.442
31.2427	41	446.442
31.263	30	447.442
31.2832	37	444.442
31.3034	24	442.442
31.3237	32	448.442
31.3439	24	445.442
31.3641	28	442.442
31.3843	27	441.442
31.4046	32	444.442
31.4248	21	446.442
31.445	30	454.442
31.4653	25	450.442
31.4855	27	454.442
31.5057	26	446.442
31.526	24	446.442
31.5462	30	443.442
31.5664	35	450.442
31.5866	32	442.442
31.6069	36	443.442
31.6271	29	442.442
31.6473	35	450.442
31.6676	41	444.442
31.6878	36	446.442
31.708	28	444.442
31.7282	34	443.442
31.7485	36	450.442
31.7687	23	447.442
31.7889	27	448.442
31.8092	35	443.442
31.8294	24	460.442
31.8496	31	451.442
31.8699	34	439.442
31.8901	32	437.442
31.9103	36	449.442
31.9305	29	446.442
31.9508	34	444.442
31.971	28	451.442
31.9912	26	450.442
32.0115	33	450.442
32.0317	31	457.442
32.0519	34	436.442
32.0721	30	445.442
32.0924	31	437.442
32.1126	40	440.442
32.1328	32	446.442
32.1531	26	442.442
32.1733	33	454.442
32.1935	19	446.442
32.2138	40	440.442
32.234	37	448.442
32.2542	39	446.442
32.2744	28	455.442
32.2947	32	440.442
32.3149	37	443.442
32.3351	43	446.442
32.3554	35	448.442
32.3756	41	445.442
32.3958	36	458.442
32.416	35	446.442
32.4363	38	466.442
32.4565	38	451.442
32.4767	33	448.442
32.497	48	458.442
32.5172	34	461.442
32.5374	35	468.442
32.5577	34	469.442
32.5779	44	464.442
32.5981	40	464.442
32.6183	45	467.442
32.6386	36	478.442
32.6588	40	465.442
32.679	46	458.442
32.6993	41	464.442
32.7195	35	461.442
32.7397	33	474.442
32.7599	38	462.442
32.7802	32	467.442
32.8004	39	470.442
32.8206	44	470.442
32.8409	28	470.442
32.8611	34	486.442
32.8813	43	476.442
32.9016	44	473.442
32.9218	49	476.442
32.942	46	496.442
32.9622	37	479.442
32.9825	36	476.442
33.0027	40	466.442
33.0229	34	464.442
33.0432	30	477.442
33.0634	46	471.442
33.0836	41	459.442
33.1038	55	481.442
33.1241	53	478.442
33.1443	62	482.442
33.1645	56	488.442
33.1848	58	498.442
33.205	74	515.442
33.2252	69	498.442
33.2455	91	527.442
33.2657	102	515.442
33.2859	112	513.442
33.3061	119	526.442
33.3264	146	537.442
33.3466	224	543.442
33.3668	271	574.442
33.3871	327	577.442
33.4073	435	582.442
33.4275	600	622.442
33.4477	703	653.442
33.468	878	706.442
33.4882	1047	806.442
33.5084	1288	1013.44
33.5287	1323	1206.44
33.5489	1236	1556.44
33.5691	1213	1961.44
33.5894	1073	2469.44
33.6096	900	3408.44
33.6298	672	4607.44
33.65	549	5867.44
33.6703	394	6946.44
33.6905	274	7162.44
33.7107	194	6160.44
33.731	119	4967.44
33.7512	106	4186.44
33.7714	82	3640.44
33.7916	83	2895.44
33.8119	63	1916.44
33.8321	70	1161.44
33.8523	69	826.442
33.8726	64	703.442
33.8928	52	639.442
33.913	81	590.442
33.9333	67	577.442
33.9535	55	585.442
33.9737	59	543.442
33.9939	54	535.442
34.0142	49	530.442
34.0344	52	525.442
34.0546	54	497.442
34.0749	61	492.442
34.0951	64	487.442
34.1153	49	477.442
34.1355	51	491.442
34.1558	51	491.442
34.176	59	477.442
34.1962	64	468.442
34.2165	75	471.442
34.2367	95	493.442
34.2569	82	461.442
34.2772	96	473.442
34.2974	101	472.442
34.3176	98	466.442
34.3378	116	471.442
34.3581	111	476.442
34.3783	126	474.442
34.3985	117	482.442
34.4188	116	488.442
34.439	128	475.442
34.4592	149	496.442
34.4794	119	490.442
34.4997	113	483.442
34.5199	142	490.442
34.5401	141	479.442
34.5604	121	511.442
34.5806	128	486.442
34.6008	121	492.442
34.6211	130	499.442
34.6413	140	507.442
34.6615	127	487.442
34.6817	134	497.442
34.702	140	480.442
34.7222	166	495.442
34.7424	136	495.442
34.7627	171	504.442
34.7829	145	511.442
34.8031	153	507.442
34.8233	152	496.442
34.8436	140	516.442
34.8638	170	495.442
34.884	179	513.442
34.9043	180	503.442
34.9245	169	502.442
34.9447	185	513.442
34.965	203	522.442
34.9852	218	513.442
35.0054	227	527.442
35.0256	238	524.442
35.0459	280	510.442
35.0661	292	519.442
35.0863	342	500.442
35.1066	359	527.442
35.1268	435	531.442
35.147	429	529.442
35.1672	521	541.442
35.1875	484	544.442
35.2077	594	563.442
35.2279	653	564.442
35.2482	804	568.442
35.2684	950	578.442
35.2886	1207	567.442
35.3089	1640	604.442
35.3291	2100	625.442
35.3493	2806	652.442
35.3695	3751	672.442
35.3898	5059	699.442
35.41	6951	702.442
35.4302	8814	760.442
35.4505	11365	918.442
35.4707	14064	979.442
35.4909	16864	1127.44
35.5111	18643	1436.44
35.5314	19565	1877.44
35.5516	18953	2455.44
35.5718	16619	3195.44
35.5921	13704	4046.44
35.6123	11436	5042.44
35.6325	9282	6567.44
35.6528	7226	8251.44
35.673	4761	9474.44
35.6932	3134	10102.4
35.7134	1916	8957.44
35.7337	1262	7089.44
35.7539	1028	5617.44
35.7741	889	5202.44
35.7944	924	4515.44
35.8146	910	3375.44
35.8348	969	2222.44
35.855	1068	1479.44
35.8753	1137	1216.44
35.8955	1280	1240.44
35.9157	1323	1347.44
35.936	1282	1597.44
35.9562	1219	2003.44
35.9764	1068	2412.44
35.9967	916	3052.44
36.0169	812	4043.44
36.0371	688	5033.44
36.0573	514	5923.44
36.0776	437	6268.44
36.0978	332	5686.44
36.118	251	4471.44
36.1383	203	3744.44
36.1585	173	3408.44
36.1787	186	3098.44
36.1989	145	2327.44
36.2192	119	1531.44
36.2394	135	1004.44
36.2596	117	748.442
36.2799	118	701.442
36.3001	141	631.442
36.3203	118	602.442
36.3406	108	583.442
36.3608	113	607.442
36.381	96	581.442
36.4012	109	538.442
36.4215	104	521.442
36.4417	96	521.442
36.4619	82	522.442
36.4822	97	529.442
36.5024	81	494.442
36.5226	100	513.442
36.5428	84	502.442
36.5631	74	499.442
36.5833	89	494.442
36.6035	87	494.442
36.6238	92	475.442
36.644	88	498.442
36.6642	91	480.442
36.6845	88	477.442
36.7047	86	495.442
36.7249	92	500.442
36.7451	84	491.442
36.7654	62	482.442
36.7856	74	485.442
36.8058	74	483.442
36.8261	77	475.442
36.8463	81	474.442
36.8665	57	471.442
36.8867	64	479.442
36.907	75	498.442
36.9272	58	462.442
36.9474	65	467.442
36.9677	63	463.442
36.9879	67	474.442
37.0081	39	479.442
37.0284	53	472.442
37.0486	80	480.442
37.0688	55	461.442
37.089	64	470.442
37.1093	45	466.442
37.1295	70	464.442
37.1497	53	466.442
37.17	49	462.442
37.1902	54	462.442
37.2104	54	457.442
37.2306	60	452.442
37.2509	51	462.442
37.2711	53	472.442
37.2913	53	475.442
37.3116	47	463.442
37.3318	48	468.442
37.352	48	453.442
37.3723	51	460.442
37.3925	51	460.442
37.4127	45	451.442
37.4329	58	452.442
37.4532	45	458.442
37.4734	41	470.442
37.4936	37	458.442
37.5139	52	465.442
37.5341	35	463.442
37.5543	35	442.442
37.5745	44	465.442
37.5948	57	466.442
37.615	42	454.442
37.6352	40	448.442
37.6555	46	458.442
37.6757	35	454.442
37.6959	25	466.442
37.7162	46	458.442
37.7364	41	451.442
37.7566	38	443.442
37.7768	44	455.442
37.7971	40	445.442
37.8173	40	458.442
37.8375	30	449.442
37.8578	32	455.442
37.878	32	445.442
37.8982	32	447.442
37.9184	40	445.442
37.9387	37	455.442
37.9589	38	452.442
37.9791	47	449.442
37.9994	34	451.442
38.0196	31	450.442
38.0398	40	447.442
38.0601	38	448.442
38.0803	41	452.442
38.1005	40	453.442
38.1207	31	457.442
38.141	34	453.442
38.1612	37	452.442
38.1814	36	445.442
38.2017	37	452.442
38.2219	30	443.442
38.2421	40	440.442
38.2623	32	442.442
38.2826	37	450.442
38.3028	33	447.442
38.323	33	432.442
38.3433	42	448.442
38.3635	43	446.442
38.3837	32	453.442
38.404	28	445.442
38.4242	37	450.442
38.4444	31	446.442
38.4646	32	445.442
38.4849	34	445.442
38.5051	40	446.442
38.5253	40	451.442
38.5456	37	452.442
38.5658	27	454.442
38.586	33	452.442
38.6062	40	449.442
38.6265	38	457.442
38.6467	51	453.442
38.6669	73	456.442
38.6872	56	453.442
38.7074	61	459.442
38.7276	70	449.442
38.7479	97	458.442
38.7681	107	483.442
38.7883	116	488.442
38.8085	119	500.442
38.8288	154	508.442
38.849	144	551.442
38.8692	132	578.442
38.8895	93	633.442
38.9097	84	723.442
38.9299	94	795.442
38.9501	74	889.442
38.9704	54	964.442
38.9906	70	1005.44
39.0108	41	902.442
39.0311	48	803.442
39.0513	38	731.442
39.0715	25	742.442
39.0918	32	696.442
39.112	31	638.442
39.1322	31	557.442
39.1524	36	512.442
39.1727	40	496.442
39.1929	29	467.442
39.2131	29	459.442
39.2334	31	452.442
39.2536	39	453.442
39.2738	31	456.442
39.294	32	463.442
39.3143	37	447.442
39.3345	23	449.442
39.3547	28	442.442
39.375	35	463.442
39.3952	25	447.442
39.4154	33	449.442
39.4357	37	443.442
39.4559	34	445.442
39.4761	47	440.442
39.4963	29	447.442
39.5166	32	435.442
39.5368	30	447.442
39.557	34	445.442
39.5773	27	443.442
39.5975	33	449.442
39.6177	27	452.442
39.6379	42	443.442
39.6582	42	451.442
39.6784	30	440.442
39.6986	31	446.442
39.7189	45	448.442
39.7391	39	438.442
39.7593	35	448.442
39.7796	32	443.442
39.7998	32	453.442
39.82	46	442.442
39.8402	46	455.442
39.8605	35	454.442
39.8807	35	447.442
39.9009	48	449.442
39.9212	32	444.442
39.9414	44	449.442
39.9616	35	465.442
39.9818	46	443.442
40.0021	37	460.442
40.0223	47	448.442
40.0425	38	466.442
40.0628	48	462.442
40.083	44	450.442
40.1032	40	443.442
40.1235	41	446.442
40.1437	39	446.442
40.1639	40	453.442
40.1841	43	456.442
40.2044	41	458.442
40.2246	45	463.442
40.2448	42	445.442
40.2651	37	456.442
40.2853	51	450.442
40.3055	44	459.442
40.3257	47	460.442
40.346	53	460.442
40.3662	58	452.442
40.3864	43	453.442
40.4067	43	455.442
40.4269	44	455.442
40.4471	47	463.442
40.4674	45	465.442
40.4876	51	454.442
40.5078	41	446.442
40.528	57	459.442
40.5483	44	463.442
40.5685	52	456.442
40.5887	42	465.442
40.609	45	463.442
40.6292	53	459.442
40.6494	60	454.442
40.6697	57	459.442
40.6899	52	462.442
40.7101	67	463.442
40.7303	62	459.442
40.7506	60	458.442
40.7708	68	455.442
40.791	72	456.442
40.8113	93	467.442
40.8315	96	473.442
40.8517	107	468.442
40.8719	116	479.442
40.8922	159	478.442
40.9124	140	486.442
40.9326	165	480.442
40.9529	207	502.442
40.9731	228	515.442
40.9933	225	545.442
41.0136	243	570.442
41.0338	301	627.442
41.054	368	676.442
41.0742	445	692.442
41.0945	582	712.442
41.1147	735	724.442
41.1349	950	717.442
41.1552	1257	731.442
41.1754	1705	699.442
41.1956	1946	732.442
41.2158	2377	785.442
41.2361	2843	853.442
41.2563	3306	924.442
41.2765	3456	1094.44
41.2968	3371	1240.44
41.317	3103	1559.44
41.3372	2657	1948.44
41.3575	2284	2472.44
41.3777	1988	3032.44
41.3979	1632	3546.44
41.4181	1308	3596.44
41.4384	1006	3381.44
41.4586	679	2909.44
41.4788	468	2584.44
41.4991	276	2285.44
41.5193	214	2120.44
41.5395	177	1804.44
41.5597	132	1530.44
41.58	133	1075.44
41.6002	91	816.442
41.6204	81	693.442
41.6407	86	585.442
41.6609	95	574.442
41.6811	87	545.442
41.7014	81	520.442
41.7216	58	512.442
41.7418	61	501.442
41.762	57	497.442
41.7823	48	478.442
41.8025	59	479.442
41.8227	55	481.442
41.843	44	475.442
41.8632	42	466.442
41.8834	40	458.442
41.9036	35	460.442
41.9239	52	465.442
41.9441	39	470.442
41.9643	47	457.442
41.9846	50	450.442
42.0048	41	449.442
42.025	42	449.442
42.0453	36	464.442
42.0655	40	458.442
42.0857	38	460.442
42.1059	38	447.442
42.1262	47	448.442
42.1464	39	465.442
42.1666	38	457.442
42.1869	31	454.442
42.2071	32	446.442
42.2273	49	447.442
42.2475	30	451.442
42.2678	43	452.442
42.288	27	457.442
42.3082	37	460.442
42.3285	34	460.442
42.3487	43	447.442
42.3689	46	438.442
42.3892	30	459.442
42.4094	27	446.442
42.4296	38	447.442
42.4498	43	456.442
42.4701	25	439.442
42.4903	33	454.442
42.5105	37	444.442
42.5308	25	444.442
42.551	30	458.442
42.5712	34	450.442
42.5914	39	451.442
42.6117	39	445.442
42.6319	43	441.442
42.6521	24	449.442
42.6724	21	449.442
42.6926	27	452.442
42.7128	25	443.442
42.7331	27	453.442
42.7533	20	446.442
42.7735	31	447.442
42.7937	32	448.442
42.814	25	445.442
42.8342	29	448.442
42.8544	27	453.442
42.8747	23	446.442
42.8949	30	451.442
42.9151	29	448.442
42.9353	36	448.442
42.9556	28	444.442
42.9758	38	447.442
42.996	29	462.442
43.0163	24	451.442
43.0365	25	445.442
43.0567	33	437.442
43.077	28	445.442
43.0972	36	436.442
43.1174	26	440.442
43.1376	23	449.442
43.1579	33	444.442
43.1781	31	433.442
43.1983	39	450.442
43.2186	36	452.442
43.2388	40	447.442
43.259	29	437.442
43.2792	30	451.442
43.2995	26	443.442
43.3197	23	439.442
43.3399	37	447.442
43.3602	32	453.442
43.3804	25	448.442
43.4006	40	446.442
43.4209	30	443.442
43.4411	27	445.442
43.4613	26	438.442
43.4815	28	449.442
43.5018	30	440.442
43.522	27	442.442
43.5422	31	449.442
43.5625	24	442.442
43.5827	26	443.442
43.6029	31	453.442
43.6231	26	442.442
43.6434	32	446.442
43.6636	34	442.442
43.6838	25	441.442
43.7041	44	442.442
43.7243	31	439.442
43.7445	30	447.442
43.7648	29	448.442
43.785	28	439.442
43.8052	31	439.442
43.8254	22	443.442
43.8457	26	445.442
43.8659	24	446.442
43.8861	22	450.442
43.9064	21	439.442
43.9266	30	442.442
43.9468	26	441.442
43.967	27	444.442
43.9873	21	451.442
44.0075	28	443.442
44.0277	30	440.442
44.048	19	444.442
44.0682	23	444.442
44.0884	27	439.442
44.1087	36	454.442
44.1289	25	444.442
44.1491	36	439.442
44.1693	20	438.442
44.1896	27	443.442
44.2098	17	445.442
44.23	26	439.442
44.2503	18	440.442
44.2705	24	437.442
44.2907	26	440.442
44.3109	26	439.442
44.3312	22	442.442
44.3514	19	436.442
44.3716	27	445.442
44.3919	30	446.442
44.4121	31	444.442
44.4323	26	435.442
44.4526	26	432.442
44.4728	34	439.442
44.493	25	439.442
44.5132	31	438.442
44.5335	19	448.442
44.5537	19	443.442
44.5739	27	437.442
44.5942	27	441.442
44.6144	26	446.442
44.6346	22	438.442
44.6548	31	445.442
44.6751	23	440.442
44.6953	16	447.442
44.7155	29	438.442
44.7358	24	446.442
44.756	21	445.442
44.7762	22	432.442
44.7965	33	442.442
44.8167	28	440.442
44.8369	25	440.442
44.8571	31	443.442
44.8774	19	446.442
44.8976	16	443.442
44.9178	23	440.442
44.9381	21	445.442
44.9583	21	445.442
44.9785	32	446.442
44.9987	26	449.442
45.019	27	450.442
45.0392	31	448.442
45.0594	28	447.442
45.0797	20	444.442
45.0999	30	442.442
45.1201	31	441.442
45.1404	17	439.442
45.1606	35	439.442
45.1808	29	448.442
45.201	22	446.442
45.2213	31	444.442
45.2415	25	456.442
45.2617	31	441.442
45.282	19	440.442
45.3022	23	449.442
45.3224	22	441.442
45.3426	30	440.442
45.3629	32	449.442
45.3831	25	441.442
45.4033	21	448.442
45.4236	14	438.442
45.4438	33	435.442
45.464	26	446.442
45.4843	27	445.442
45.5045	16	450.442
45.5247	27	445.442
45.5449	21	448.442
45.5652	27	445.442
45.5854	26	442.442
45.6056	24	437.442
45.6259	29	438.442
45.6461	23	440.442
45.6663	40	444.442
45.6865	27	449.442
45.7068	19	438.442
45.727	24	450.442
45.7472	21	444.442
45.7675	28	441.442
45.7877	30	439.442
45.8079	17	438.442
45.8282	19	445.442
45.8484	23	453.442
45.8686	24	435.442
45.8888	23	438.442
45.9091	14	440.442
45.9293	26	446.442
45.9495	22	437.442
45.9698	22	447.442
45.99	20	443.442
46.0102	30	441.442
46.0304	22	441.442
46.0507	35	439.442
46.0709	38	439.442
46.0911	12	437.442
46.1114	30	438.442
46.1316	21	442.442
46.1518	20	446.442
46.1721	25	436.442
46.1923	29	439.442
46.2125	29	436.442
46.2327	22	445.442
46.253	27	436.442
46.2732	20	445.442
46.2934	22	440.442
46.3137	21	438.442
46.3339	21	436.442
46.3541	26	448.442
46.3743	26	440.442
46.3946	29	446.442
46.4148	29	437.442
46.435	27	434.442
46.4553	22	442.442
46.4755	30	452.442
46.4957	26	441.442
46.516	22	444.442
46.5362	20	433.442
46.5564	36	441.442
46.5766	25	442.442
46.5969	29	445.442
46.6171	17	437.442
46.6373	30	440.442
46.6576	16	434.442
46.6778	24	448.442
46.698	27	444.442
46.7182	25	439.442
46.7385	22	437.442
46.7587	23	435.442
46.7789	19	450.442
46.7992	25	445.442
46.8194	33	438.442
46.8396	17	436.442
46.8599	19	442.442
46.8801	26	440.442
46.9003	33	440.442
46.9205	34	437.442
46.9408	36	445.442
46.961	26	446.442
46.9812	28	440.442
47.0015	30	446.442
47.0217	18	450.442
47.0419	20	449.442
47.0621	27	446.442
47.0824	22	448.442
47.1026	20	440.442
47.1228	23	436.442
47.1431	18	448.442
47.1633	26	442.442
47.1835	31	443.442
47.2038	26	445.442
47.224	28	448.442
47.2442	25	448.442
47.2644	27	455.442
47.2847	20	454.442
47.3049	24	459.442
47.3251	27	454.442
47.3454	35	445.442
47.3656	28	453.442
47.3858	28	456.442
47.406	33	454.442
47.4263	27	462.442
47.4465	29	458.442
47.4667	38	461.442
47.487	39	452.442
47.5072	41	457.442
47.5274	35	460.442
47.5477	42	451.442
47.5679	49	446.442
47.5881	49	464.442
47.6083	67	485.442
47.6286	82	487.442
47.6488	86	496.442
47.669	98	512.442
47.6893	99	510.442
47.7095	107	554.442
47.7297	88	594.442
47.7499	82	633.442
47.7702	80	703.442
47.7904	79	771.442
47.8106	76	813.442
47.8309	57	844.442
47.8511	77	748.442
47.8713	78	701.442
47.8916	74	675.442
47.9118	81	642.442
47.932	77	687.442
47.9522	91	689.442
47.9725	81	655.442
47.9927	71	658.442
48.0129	77	623.442
48.0332	80	656.442
48.0534	68	675.442
48.0736	53	728.442
48.0938	68	738.442
48.1141	45	698.442
48.1343	45	652.442
48.1545	45	667.442
48.1748	31	593.442
48.195	36	589.442
48.2152	26	577.442
48.2355	34	564.442
48.2557	27	549.442
48.2759	31	520.442
48.2961	27	486.442
48.3164	20	468.442
48.3366	33	462.442
48.3568	26	460.442
48.3771	31	461.442
48.3973	29	443.442
48.4175	25	459.442
48.4377	22	452.442
48.458	32	447.442
48.4782	31	446.442
48.4984	19	444.442
48.5187	21	448.442
48.5389	26	455.442
48.5591	17	464.442
48.5794	30	450.442
48.5996	32	445.442
48.6198	22	443.442
48.64	35	443.442
48.6603	24	441.442
48.6805	23	439.442
48.7007	24	443.442
48.721	22	446.442
48.7412	29	451.442
48.7614	27	445.442
48.7816	21	441.442
48.8019	15	445.442
48.8221	26	441.442
48.8423	30	448.442
48.8626	26	442.442
48.8828	18	445.442
48.903	26	444.442
48.9233	31	443.442
48.9435	26	452.442
48.9637	30	445.442
48.9839	35	449.442
49.0042	24	452.442
49.0244	24	443.442
49.0446	24	444.442
49.0649	30	445.442
49.0851	26	453.442
49.1053	22	442.442
49.1255	31	441.442
49.1458	20	440.442
49.166	27	438.442
49.1862	32	446.442
49.2065	31	438.442
49.2267	36	449.442
49.2469	25	442.442
49.2672	27	451.442
49.2874	27	448.442
49.3076	18	451.442
49.3278	26	459.442
49.3481	23	442.442
49.3683	31	443.442
49.3885	25	455.442
49.4088	28	451.442
49.429	29	461.442
49.4492	30	449.442
49.4694	29	458.442
49.4897	32	453.442
49.5099	47	444.442
49.5301	30	457.442
49.5504	42	454.442
49.5706	45	459.442
49.5908	59	456.442
49.6111	56	475.442
49.6313	63	464.442
49.6515	61	468.442
49.6717	91	478.442
49.692	107	491.442
49.7122	106	524.442
49.7324	123	518.442
49.7527	151	553.442
49.7729	145	581.442
49.7931	156	614.442
49.8133	108	729.442
49.8336	97	822.442
49.8538	110	922.442
49.874	103	1035.44
49.8943	94	1094.44
49.9145	93	1087.44
49.9347	68	1027.44
49.955	57	825.442
49.9752	59	750.442
49.9954	41	756.442
50.0156	29	771.442
50.0359	34	774.442
50.0561	21	701.442
50.0763	27	623.442
50.0966	24	537.442
50.1168	24	496.442
50.137	26	490.442
50.1572	26	466.442
50.1775	31	468.442
50.1977	22	467.442
50.2179	24	450.442
50.2382	33	460.442
50.2584	22	460.442
50.2786	33	463.442
50.2989	34	457.442
50.3191	39	452.442
50.3393	20	455.442
50.3595	28	454.442
50.3798	24	451.442
[truncated: 1,959 more rows]

## Sheet: Fig6
SiC06			SiC1			SiC3			SiC5
Frequency	e'	e''	Frequency	e'	e''	Frequency	e'	e''	Frequency	e'	e''
2000000000	5.9223	1.1066	2000000000	6.1664	0.8352	2000000000	5.9509	0.4245	2000000000	5.8269	0.3658
2080000000	5.8999	1.1349	2080000000	6.1607	0.8715	2080000000	5.9362	0.4271	2080000000	5.8138	0.3703
2160000000	5.9052	1.1442	2160000000	6.1793	0.8953	2160000000	5.937	0.418	2160000000	5.8154	0.3681
2240000000	5.8811	1.1557	2240000000	6.1721	0.9214	2240000000	5.9302	0.4006	2240000000	5.8086	0.3525
2320000000	5.8751	1.1876	2320000000	6.1761	0.9646	2320000000	5.9069	0.4171	2320000000	5.7863	0.3708
2400000000	5.8743	1.1943	2400000000	6.1902	0.9854	2400000000	5.9244	0.4039	2400000000	5.8065	0.3623
2480000000	5.8547	1.224	2480000000	6.1837	1.027	2480000000	5.9104	0.4036	2480000000	5.7948	0.3621
2560000000	5.8591	1.2387	2560000000	6.2015	1.0566	2560000000	5.9111	0.4022	2560000000	5.7949	0.3615
2640000000	5.8426	1.2613	2640000000	6.2009	1.0924	2640000000	5.924	0.4026	2640000000	5.813	0.3652
2720000000	5.8344	1.2897	2720000000	6.202	1.1335	2720000000	5.9133	0.4052	2720000000	5.804	0.3659
2800000000	5.8389	1.3028	2800000000	6.2204	1.1644	2800000000	5.9424	0.4073	2800000000	5.8342	0.369
2880000000	5.8173	1.336	2880000000	6.2115	1.2116	2880000000	5.9384	0.4068	2880000000	5.8342	0.3657
2960000000	5.8268	1.3521	2960000000	6.2321	1.245	2960000000	5.9627	0.4113	2960000000	5.86	0.3699
3040000000	5.8101	1.372	3040000000	6.2272	1.282	3040000000	5.9666	0.4095	3040000000	5.8684	0.3665
3120000000	5.8041	1.4114	3120000000	6.2306	1.3367	3120000000	5.974	0.4256	3120000000	5.8787	0.3818
3200000000	5.8032	1.4183	3200000000	6.2411	1.3621	3200000000	5.9967	0.4348	3200000000	5.9039	0.3903
3280000000	5.7852	1.4523	3280000000	6.2342	1.4142	3280000000	6.0096	0.442	3280000000	5.9189	0.3954
3360000000	5.7885	1.4658	3360000000	6.2446	1.4471	3360000000	6.0224	0.4561	3360000000	5.9331	0.4044
3440000000	5.773	1.4888	3440000000	6.2403	1.4906	3440000000	6.028	0.4813	3440000000	5.9405	0.4257
3520000000	5.7739	1.5228	3520000000	6.2503	1.5415	3520000000	6.0527	0.4975	3520000000	5.9678	0.4362
3600000000	5.7719	1.5279	3600000000	6.2553	1.5677	3600000000	6.0577	0.5082	3600000000	5.9742	0.4448
3680000000	5.7488	1.5651	3680000000	6.2392	1.6222	3680000000	6.0582	0.535	3680000000	5.9759	0.4637
3760000000	5.754	1.5845	3760000000	6.2503	1.6624	3760000000	6.0646	0.5631	3760000000	5.9832	0.4867
3840000000	5.7399	1.6019	3840000000	6.2435	1.7004	3840000000	6.0715	0.5901	3840000000	5.9903	0.5083
3920000000	5.7293	1.63	3920000000	6.2385	1.7453	3920000000	6.077	0.6114	3920000000	5.9958	0.5229
4000000000	5.7165	1.6422	4000000000	6.2308	1.7806	4000000000	6.0642	0.6353	4000000000	5.9815	0.5433
4080000000	5.697	1.6797	4080000000	6.2181	1.8409	4080000000	6.0662	0.6753	4080000000	5.9836	0.5771
4160000000	5.7014	1.7051	4160000000	6.2252	1.8886	4160000000	6.0681	0.7069	4160000000	5.9839	0.6021
4240000000	5.6849	1.7174	4240000000	6.2145	1.9228	4240000000	6.0702	0.7244	4240000000	5.9861	0.6181
4320000000	5.6674	1.76	4320000000	6.1994	1.987	4320000000	6.0493	0.7496	4320000000	5.9655	0.6392
4400000000	5.6701	1.7822	4400000000	6.2064	2.0354	4400000000	6.0447	0.7814	4400000000	5.9578	0.67
4480000000	5.6478	1.8233	4480000000	6.1872	2.1035	4480000000	6.0329	0.8086	4480000000	5.9436	0.6951
4560000000	5.646	1.8663	4560000000	6.1864	2.1718	4560000000	6.0205	0.8389	4560000000	5.9281	0.7236
4640000000	5.6369	1.8995	4640000000	6.1801	2.2334	4640000000	6.0169	0.8651	4640000000	5.9228	0.7503
4720000000	5.6171	1.9609	4720000000	6.1606	2.325	4720000000	5.9936	0.8959	4720000000	5.8984	0.7797
4800000000	5.6264	2.0108	4800000000	6.1682	2.4065	4800000000	5.9988	0.929	4800000000	5.8995	0.8167
4880000000	5.5979	2.0625	4880000000	6.1386	2.4894	4880000000	5.9828	0.9381	4880000000	5.8809	0.8265
4960000000	5.5978	2.1357	4960000000	6.1354	2.5994	4960000000	5.979	0.9821	4960000000	5.872	0.8718
5040000000	5.5854	2.1828	5040000000	6.117	2.6822	5040000000	5.9844	0.9857	5040000000	5.8728	0.8813
5120000000	5.5562	2.2645	5120000000	6.0793	2.7986	5120000000	5.9714	1.0177	5120000000	5.8565	0.9149
5200000000	5.554	2.3265	5200000000	6.0657	2.899	5200000000	5.9766	1.0349	5200000000	5.8568	0.9363
5280000000	5.5124	2.389	5280000000	6.0098	2.9975	5280000000	5.9743	1.0504	5280000000	5.8497	0.9542
5360000000	5.4984	2.4731	5360000000	5.9795	3.119	5360000000	5.9845	1.0771	5360000000	5.8555	0.9831
5440000000	5.4735	2.5234	5440000000	5.9366	3.2063	5440000000	5.9877	1.0827	5440000000	5.8541	0.9938
5520000000	5.4318	2.6045	5520000000	5.8751	3.3217	5520000000	6.0003	1.1092	5520000000	5.8635	1.0224
5600000000	5.4203	2.6616	5600000000	5.8399	3.4185	5600000000	6.0166	1.1291	5600000000	5.8738	1.0446
5680000000	5.3722	2.7104	5680000000	5.7685	3.4971	5680000000	6.0366	1.1338	5680000000	5.8897	1.0522
5760000000	5.3438	2.7832	5760000000	5.7082	3.6038	5760000000	6.0451	1.1598	5760000000	5.8962	1.0776
5840000000	5.3141	2.8215	5840000000	5.6535	3.6746	5840000000	6.0606	1.1763	5840000000	5.9078	1.0955
5920000000	5.2706	2.8871	5920000000	5.5822	3.7694	5920000000	6.0961	1.215	5920000000	5.9402	1.1336
6000000000	5.2569	2.9231	6000000000	5.5368	3.8352	6000000000	6.1112	1.2158	6000000000	5.9509	1.134
6080000000	5.2148	2.9653	6080000000	5.4634	3.9087	6080000000	6.1406	1.2635	6080000000	5.9795	1.178
6160000000	5.1833	3.0177	6160000000	5.3987	3.9884	6160000000	6.1603	1.2803	6160000000	5.9988	1.1904
6240000000	5.1681	3.0619	6240000000	5.3485	4.0621	6240000000	6.1799	1.3246	6240000000	6.0174	1.229
6320000000	5.1279	3.1166	6320000000	5.2744	4.142	6320000000	6.215	1.3668	6320000000	6.0516	1.2663
6400000000	5.1249	3.1617	6400000000	5.2299	4.2163	6400000000	6.2316	1.4021	6400000000	6.0696	1.2917
6480000000	5.0878	3.2118	6480000000	5.1549	4.292	6480000000	6.2485	1.4532	6480000000	6.0901	1.3358
6560000000	5.0508	3.2766	6560000000	5.0708	4.3832	6560000000	6.2475	1.4949	6560000000	6.0944	1.3666
6640000000	5.0423	3.3396	6640000000	5.0124	4.4764	6640000000	6.2589	1.5704	6640000000	6.1113	1.4323
6720000000	4.9855	3.401	6720000000	4.9048	4.5565	6720000000	6.2695	1.6267	6720000000	6.1304	1.4776
6800000000	4.9771	3.4841	6800000000	4.8396	4.6652	6800000000	6.281	1.6836	6800000000	6.15	1.5229
6880000000	4.9257	3.5487	6880000000	4.7283	4.7452	6880000000	6.2634	1.7479	6880000000	6.1471	1.5768
6960000000	4.8702	3.6331	6960000000	4.6072	4.8419	6960000000	6.2538	1.8123	6960000000	6.1493	1.6334
7040000000	4.8429	3.7155	7040000000	4.5098	4.9393	7040000000	6.2529	1.8741	7040000000	6.1621	1.6866
7120000000	4.753	3.785	7120000000	4.3511	5.0061	7120000000	6.2216	1.9274	7120000000	6.1455	1.7383
7200000000	4.7068	3.8853	7200000000	4.2261	5.1105	7200000000	6.2157	1.9959	7200000000	6.1529	1.8036
7280000000	4.6324	3.9426	7280000000	4.0842	5.1569	7280000000	6.1963	2.0353	7280000000	6.1447	1.843
7360000000	4.5287	4.0313	7360000000	3.9008	5.2206	7360000000	6.1683	2.0945	7360000000	6.1258	1.9045
7440000000	4.4719	4.1105	7440000000	3.7665	5.284	7440000000	6.158	2.1341	7440000000	6.1191	1.9492
7520000000	4.3507	4.1625	7520000000	3.5813	5.2993	7520000000	6.1245	2.1838	7520000000	6.0883	2.0054
7600000000	4.2661	4.2432	7600000000	3.4233	5.3411	7600000000	6.1295	2.2157	7600000000	6.0878	2.0364
7680000000	4.1649	4.2762	7680000000	3.2643	5.3299	7680000000	6.1026	2.2434	7680000000	6.0547	2.0656
7760000000	4.0366	4.3316	7760000000	3.0794	5.3304	7760000000	6.091	2.308	7760000000	6.0363	2.1228
7840000000	3.9476	4.3648	7840000000	2.9365	5.3143	7840000000	6.0859	2.3152	7840000000	6.017	2.1223
7920000000	3.8046	4.3831	7920000000	2.7558	5.2671	7920000000	6.0583	2.3878	7920000000	5.9889	2.1846
8000000000	3.6997	4.4247	8000000000	2.6064	5.2471	8000000000	6.0593	2.4179	8000000000	5.9818	2.2006
8080000000	3.5908	4.4255	8080000000	2.4689	5.1883	8080000000	6.0391	2.4579	8080000000	5.9558	2.2334
8160000000	3.4529	4.4303	8160000000	2.3098	5.125	8160000000	6.0418	2.4965	8160000000	5.9519	2.2533
8240000000	3.3497	4.4437	8240000000	2.1816	5.073	8240000000	6.0287	2.5433	8240000000	5.9311	2.2843
8320000000	3.2302	4.4224	8320000000	2.0552	4.9921	8320000000	6.0247	2.6069	8320000000	5.9272	2.3317
8400000000	3.1107	4.4214	8400000000	1.9252	4.9251	8400000000	6.0144	2.6436	8400000000	5.9166	2.3488
8480000000	2.9946	4.3977	8480000000	1.8047	4.8406	8480000000	6.0008	2.7219	8480000000	5.9096	2.4135
8560000000	2.8621	4.3771	8560000000	1.6782	4.7572	8560000000	5.9782	2.7793	8560000000	5.8994	2.456
8640000000	2.7586	4.3644	8640000000	1.5747	4.6849	8640000000	5.9564	2.8319	8640000000	5.8859	2.5003
8720000000	2.6355	4.3201	8720000000	1.4644	4.5875	8720000000	5.9183	2.9199	8720000000	5.8672	2.5825
8800000000	2.5035	4.2986	8800000000	1.3454	4.5039	8800000000	5.8879	2.9903	8800000000	5.8513	2.6515
8880000000	2.3976	4.2708	8880000000	1.256	4.4273	8880000000	5.8556	3.0876	8880000000	5.8321	2.7552
8960000000	2.2788	4.2189	8960000000	1.1593	4.3273	8960000000	5.8253	3.1193	8960000000	5.8133	2.7967
9040000000	2.1541	4.1917	9040000000	1.0565	4.2461	9040000000	5.7727	3.2227	9040000000	5.7676	2.9129
9120000000	2.0522	4.1239	9120000000	0.9831	4.1436	9120000000	5.7375	3.2731	9120000000	5.7424	2.9777
9200000000	1.9262	4.083	9200000000	0.885	4.0561	9200000000	5.6767	3.3523	9200000000	5.6821	3.0714
9280000000	1.8374	4.0327	9280000000	0.8194	3.9721	9280000000	5.6673	3.4098	9280000000	5.6686	3.1469
9360000000	1.7243	3.946	9360000000	0.7453	3.8584	9360000000	5.561	3.4818	9360000000	5.5666	3.2287
9440000000	1.6269	3.9023	9440000000	0.6747	3.7793	9440000000	5.5634	3.5647	9440000000	5.5588	3.3219
9520000000	1.549	3.8061	9520000000	0.6291	3.6684	9520000000	5.4994	3.577	9520000000	5.488	3.3446
9600000000	1.4458	3.732	9600000000	0.562	3.571	9600000000	5.4453	3.6595	9600000000	5.4316	3.4293
9680000000	1.3847	3.6508	9680000000	0.5269	3.4785	9680000000	5.4067	3.6895	9680000000	5.3882	3.4606
9760000000	1.3087	3.5382	9760000000	0.4877	3.3598	9760000000	5.3527	3.7258	9760000000	5.3323	3.4957
9840000000	1.2408	3.4532	9840000000	0.4491	3.2632	9840000000	5.3268	3.7798	9840000000	5.3045	3.5467
9920000000	1.2027	3.3303	9920000000	0.4402	3.1482	9920000000	5.2655	3.7938	9920000000	5.246	3.5574
10000000000	1.1419	3.2158	10000000000	0.4095	3.0363	10000000000	5.2069	3.8347	10000000000	5.1982	3.5923
10080000000	1.1221	3.1039	10080000000	0.4081	2.9307	10080000000	5.2067	3.8509	10080000000	5.1991	3.6042
10160000000	1.0969	2.9603	10160000000	0.4063	2.8047	10160000000	5.126	3.9328	10160000000	5.1332	3.682
10240000000	1.0925	2.8379	10240000000	0.4146	2.6938	10240000000	5.1252	3.9089	10240000000	5.1372	3.654
10320000000	1.1087	2.6936	10320000000	0.4398	2.5707	10320000000	5.0309	3.943	10320000000	5.0559	3.692
10400000000	1.1316	2.5566	10400000000	0.4695	2.4498	10400000000	5.0272	3.9958	10400000000	5.0692	3.7408
10480000000	1.1889	2.4266	10480000000	0.5221	2.3342	10480000000	4.9428	4.0063	10480000000	4.9894	3.7556
10560000000	1.2589	2.296	10560000000	0.5845	2.2172	10560000000	4.9035	4.0657	10560000000	4.9653	3.8181
10640000000	1.3441	2.1894	10640000000	0.6623	2.1136	10640000000	4.8481	4.0681	10640000000	4.9118	3.8189
10720000000	1.4597	2.103	10720000000	0.7683	2.0284	10720000000	4.7646	4.1726	10720000000	4.8304	3.9313
10800000000	1.5695	2.037	10800000000	0.8766	1.9619	10800000000	4.7235	4.1444	10800000000	4.7815	3.9179
10880000000	1.6927	2.0121	10880000000	1.0005	1.9375	10880000000	4.5984	4.204	10880000000	4.6019	3.9882
10960000000	1.8108	2.0061	10960000000	1.1171	1.9557	10960000000	4.5284	4.275	10960000000	4.4354	3.9425
11040000000	1.9073	2.0422	11040000000	1.1676	2.0239	11040000000	4.3506	4.2402	11040000000	4.4818	3.7231
11120000000	2.0053	2.0927	11120000000	1.1632	2.0235	11120000000	4.28	4.199	11120000000	4.5363	3.9004
11200000000	2.0577	2.1576	11200000000	1.2396	1.9751	11200000000	4.3145	4.162	11200000000	4.4858	3.9015
11280000000	2.0978	2.2495	11280000000	1.3431	2.0387	11280000000	4.1814	4.2438	11280000000	4.3456	3.9777
11360000000	2.1213	2.3179	11360000000	1.3983	2.1238	11360000000	4.1722	4.2785	11360000000	4.3461	4.0014
11440000000	2.1067	2.4018	11440000000	1.3926	2.2194	11440000000	4.0886	4.3224	11440000000	4.275	4.0491
11520000000	2.103	2.4754	11520000000	1.3758	2.3025	11520000000	4.0044	4.3962	11520000000	4.2006	4.1318
11600000000	2.0605	2.5265	11600000000	1.3236	2.3556	11600000000	3.9067	4.3594	11600000000	4.1009	4.1032
11680000000	2.0262	2.5954	11680000000	1.2656	2.4096	11680000000	3.8244	4.4336	11680000000	4.0318	4.1819
11760000000	1.9887	2.6169	11760000000	1.2124	2.423	11760000000	3.7754	4.4313	11760000000	3.9925	4.1906
11840000000	1.9225	2.658	11840000000	1.1392	2.4354	11840000000	3.6085	4.4236	11840000000	3.8169	4.1874
11920000000	1.8981	2.6796	11920000000	1.0969	2.4327	11920000000	3.6247	4.443	11920000000	3.8462	4.2038
12000000000	1.8394	2.6755	12000000000	1.0433	2.4063	12000000000	3.4953	4.4151	12000000000	3.7215	4.1862
12080000000	1.7991	2.6908	12080000000	0.9982	2.3934	12080000000	3.4148	4.4272	12080000000	3.6328	4.2054
12160000000	1.7709	2.6639	12160000000	0.9723	2.3528	12160000000	3.3619	4.3629	12160000000	3.5882	4.1377
12240000000	1.7225	2.6555	12240000000	0.9347	2.3202	12240000000	3.3126	4.3765	12240000000	3.5343	4.1614
12320000000	1.707	2.6381	12320000000	0.922	2.2825	12320000000	3.2785	4.3244	12320000000	3.5068	4.0983
12400000000	1.678	2.5972	12400000000	0.9044	2.2319	12400000000	3.1834	4.257	12400000000	3.3986	4.0426
12480000000	1.6545	2.584	12480000000	0.8882	2.1976	12480000000	3.2009	4.2488	12480000000	3.4197	4.0249
12560000000	1.6514	2.5435	12560000000	0.8908	2.1499	12560000000	3.1382	4.1783	12560000000	3.3583	3.9561
12640000000	1.6277	2.5118	12640000000	0.8804	2.1081	12640000000	3.089	4.1411	12640000000	3.308	3.9235
12720000000	1.627	2.4855	12720000000	0.8853	2.069	12720000000	3.1117	4.0746	12720000000	3.3321	3.8454
12800000000	1.6184	2.4439	12800000000	0.8871	2.0225	12800000000	3.021	4.0402	12800000000	3.2405	3.8249
12880000000	1.6123	2.4196	12880000000	0.8887	1.9848	12880000000	3.0624	4.0155	12880000000	3.2878	3.7943
12960000000	1.6158	2.3794	12960000000	0.9008	1.9436	12960000000	3.0117	3.9085	12960000000	3.2238	3.6961
13040000000	1.6071	2.3515	13040000000	0.9027	1.9046	13040000000	3.0132	3.9276	13040000000	3.2347	3.7243
13120000000	1.6086	2.3292	13120000000	0.9134	1.8726	13120000000	2.9955	3.8522	13120000000	3.2116	3.6462
13200000000	1.6165	2.2906	13200000000	0.9273	1.8333	13200000000	2.9806	3.8372	13200000000	3.1968	3.643
13280000000	1.6102	2.2689	13280000000	0.931	1.7992	13280000000	3.0354	3.7835	13280000000	3.2558	3.5843
13360000000	1.6214	2.2466	13360000000	0.9463	1.7714	13360000000	2.97	3.7437	13360000000	3.1824	3.5547
13440000000	1.6165	2.2176	13440000000	0.954	1.7413	13440000000	2.9829	3.7222	13440000000	3.1957	3.5475
13520000000	1.6281	2.2134	13520000000	0.9697	1.7231	13520000000	3.0032	3.686	13520000000	3.2127	3.5074
13600000000	1.6448	2.1857	13600000000	0.9908	1.6927	13600000000	2.9905	3.6786	13600000000	3.1987	3.5181
13680000000	1.6471	2.1762	13680000000	1.001	1.6718	13680000000	3.0251	3.6627	13680000000	3.2426	3.5024
13760000000	1.6722	2.1641	13760000000	1.0245	1.6544	13760000000	3.0248	3.6173	13760000000	3.235	3.4702
13840000000	1.6789	2.143	13840000000	1.0396	1.63	13840000000	3.0584	3.6254	13840000000	3.274	3.4861
13920000000	1.6953	2.1456	13920000000	1.058	1.6194	13920000000	3.0703	3.6044	13920000000	3.2885	3.4659
14000000000	1.7151	2.1221	14000000000	1.0807	1.5957	14000000000	3.0934	3.5752	14000000000	3.3101	3.4413
14080000000	1.7159	2.1122	14080000000	1.09	1.5768	14080000000	3.1185	3.5553	14080000000	3.3309	3.423
14160000000	1.7441	2.1053	14160000000	1.1115	1.5636	14160000000	3.1189	3.5599	14160000000	3.3407	3.4276
14240000000	1.7516	2.0792	14240000000	1.1275	1.5379	14240000000	3.1557	3.4744	14240000000	3.3734	3.344
14320000000	1.7607	2.0779	14320000000	1.1434	1.5256	14320000000	3.1739	3.4848	14320000000	3.396	3.3496
14400000000	1.7786	2.0565	14400000000	1.1631	1.5023	14400000000	3.2042	3.47	14400000000	3.425	3.3438
14480000000	1.7785	2.0447	14480000000	1.1732	1.4859	14480000000	3.2098	3.4239	14480000000	3.4346	3.2809
14560000000	1.795	2.0242	14560000000	1.1906	1.4662	14560000000	3.2134	3.3747	14560000000	3.4371	3.2306
14640000000	1.7952	1.9963	14640000000	1.2003	1.4416	14640000000	3.2535	3.308	14640000000	3.4757	3.1554
14720000000	1.7901	1.9835	14720000000	1.2066	1.422	14720000000	3.2162	3.2656	14720000000	3.4195	3.1029
14800000000	1.8087	1.9517	14800000000	1.2246	1.3973	14800000000	3.2784	3.2025	14800000000	3.4844	3.0342
14880000000	1.8025	1.9282	14880000000	1.2295	1.3736	14880000000	3.328	3.1527	14880000000	3.5368	2.9671
14960000000	1.8027	1.9078	14960000000	1.2383	1.3518	14960000000	3.2869	3.1444	14960000000	3.4861	2.9652
15040000000	1.8087	1.8743	15040000000	1.2482	1.3275	15040000000	3.3344	3.1183	15040000000	3.5234	2.9209
15120000000	1.7978	1.8534	15120000000	1.252	1.3057	15120000000	3.3131	3.088	15120000000	3.4952	2.8785
15200000000	1.8149	1.8223	15200000000	1.267	1.2814	15200000000	3.3378	3.0768	15200000000	3.5131	2.8634
15280000000	1.8033	1.7912	15280000000	1.2699	1.2569	15280000000	3.3074	3.0238	15280000000	3.4701	2.796
15360000000	1.8112	1.7793	15360000000	1.2807	1.2406	15360000000	3.2947	3.0229	15360000000	3.4501	2.7859
15440000000	1.8287	1.7458	15440000000	1.2968	1.2184	15440000000	3.372	3.0039	15440000000	3.528	2.7598
15520000000	1.8293	1.7335	15520000000	1.3049	1.2021	15520000000	3.2896	3.0058	15520000000	3.4323	2.7539
15600000000	1.8633	1.7099	15600000000	1.3295	1.1837	15600000000	3.3745	3.0011	15600000000	3.5059	2.74
15680000000	1.8762	1.6916	15680000000	1.3426	1.1672	15680000000	3.3854	2.9858	15680000000	3.5066	2.7073
15760000000	1.9154	1.6949	15760000000	1.3667	1.161	15760000000	3.3989	3.0211	15760000000	3.5164	2.7458
15840000000	1.9545	1.6685	15840000000	1.3919	1.1426	15840000000	3.4399	3.0119	15840000000	3.5547	2.7292
15920000000	1.9801	1.6736	15920000000	1.4104	1.1358	15920000000	3.456	3.0039	15920000000	3.5664	2.7117
16000000000	2.0414	1.6798	16000000000	1.4458	1.1305	16000000000	3.5532	3.0544	16000000000	3.6571	2.7656
16080000000	2.0716	1.6753	16080000000	1.4633	1.1197	16080000000	3.5462	3.0447	16080000000	3.6479	2.74
16160000000	2.1289	1.6987	16160000000	1.4946	1.1199	16160000000	3.5586	3.089	16160000000	3.6529	2.7837
16240000000	2.1746	1.6939	16240000000	1.518	1.1078	16240000000	3.7199	3.0966	16240000000	3.817	2.7865
16320000000	2.2038	1.7349	16320000000	1.5371	1.1131	16320000000	3.695	3.1748	16320000000	3.7741	2.8581
16400000000	2.2719	1.7532	16400000000	1.57	1.1034	16400000000	3.8155	3.1467	16400000000	3.8811	2.8345
16480000000	2.2824	1.7565	16480000000	1.5769	1.0931	16480000000	3.8237	3.1753	16480000000	3.8777	2.8311
16560000000	2.3053	1.8096	16560000000	1.5918	1.0975	16560000000	3.9321	3.2813	16560000000	3.9662	2.9368
16640000000	2.32	1.8182	16640000000	1.6003	1.0847	16640000000	4.005	3.2986	16640000000	4.0035	2.9579
16720000000	2.303	1.8277	16720000000	1.5997	1.0739	16720000000	3.9698	3.2481	16720000000	3.9644	2.8378
16800000000	2.3136	1.844	16800000000	1.6069	1.0622	16800000000	4.0909	3.4026	16800000000	4.0377	2.9563
16880000000	2.2708	1.823	16880000000	1.5885	1.0454	16880000000	4.0793	3.4147	16880000000	4.0122	2.8642
16960000000	2.2313	1.8321	16960000000	1.5819	1.0395	16960000000	3.939	3.4704	16960000000	3.8464	2.7812
17040000000	2.2133	1.7759	17040000000	1.5657	1.0078	17040000000	4.1988	3.4954	17040000000	4.1497	2.7282
17120000000	2.1404	1.7319	17120000000	1.5304	0.993	17120000000	3.8496	3.5857	17120000000	3.9325	2.5409
17200000000	2.1169	1.689	17200000000	1.5134	0.9667	17200000000	3.7298	3.6254	17200000000	3.9904	2.4749
17280000000	2.069	1.5959	17280000000	1.4729	0.933	17280000000	3.6628	3.4096	17280000000	4.205	2.2129
17360000000	2.0209	1.5474	17360000000	1.4406	0.9127	17360000000	3.2914	3.3392	17360000000	4.1574	2.1707
17440000000	2.0151	1.462	17440000000	1.4075	0.8724	17440000000	3.1623	3.1463	17440000000	4.2661	2.16
17520000000	1.9642	1.365	17520000000	1.3516	0.8381	17520000000	3.2237	2.6754	17520000000	4.376	1.973
17600000000	1.9737	1.3153	17600000000	1.3296	0.8016	17600000000	3.1319	2.6317	17600000000	4.3466	2.1182
17680000000	1.9712	1.2033	17680000000	1.2707	0.7487	17680000000	3.2697	2.4538	17680000000	4.4361	2.1001
17760000000	1.9641	1.1441	17760000000	1.2245	0.7047	17760000000	3.2595	2.1926	17760000000	4.3398	1.9796
17840000000	2.0293	1.0601	17840000000	1.1829	0.6231	17840000000	3.3779	2.304	17840000000	4.427	2.1439
17920000000	2.0396	0.9805	17920000000	1.1089	0.5498	17920000000	3.3883	2.2059	17920000000	4.3894	2.1033
18000000000	2.1223	0.9581	18000000000	1.0834	0.4276	18000000000	3.3927	2.1483	18000000000	4.3273	2.1029

## Sheet: Fig8(b)
Frequency	α	Frequency	α	Frequency	α	Frequency	α
GHz		GHz		GHz		GHz
	SiC06		SiC1		SiC3		SiC5
2	3.69597	2	4.9769	2	0.35926	2	4.53178
2.08	3.55537	2.08	5.60716	2.08	0.15697	2.08	4.75665
2.16	3.1831	2.16	6.33312	2.16	0.59456	2.16	4.53117
2.24	3.36762	2.24	6.51985	2.24	0.4567	2.24	4.65487
2.32	2.78038	2.32	7.54371	2.32	0.64558	2.32	4.57659
2.4	2.68111	2.4	8.03184	2.4	0.94835	2.4	4.37023
2.48	2.69319	2.48	8.3186	2.48	0.76732	2.48	4.65609
2.56	2.24468	2.56	9.02403	2.56	1.17824	2.56	4.33825
2.64	2.46827	2.64	9.09282	2.64	1.0428	2.64	4.53854
2.72	2.02994	2.72	9.76861	2.72	1.1115	2.72	4.49439
2.8	1.96029	2.8	10.118	2.8	1.46862	2.8	4.17225
2.88	2.21371	2.88	10.0662	2.88	1.18567	2.88	4.41519
2.96	1.68897	2.96	10.6933	2.96	1.68751	2.96	4.07269
3.04	2.34146	3.04	10.2676	3.04	1.36782	3.04	4.25216
3.12	2.15232	3.12	10.4871	3.12	1.61897	3.12	4.051
3.2	2.17539	3.2	10.5865	3.2	1.78252	3.2	3.85302
3.28	2.94332	3.28	9.84616	3.28	1.35817	3.28	4.12496
3.36	2.66927	3.36	10.0873	3.36	1.76124	3.36	3.72785
3.44	3.7492	3.44	8.99753	3.44	1.3645	3.44	4.01973
3.52	4.0134	3.52	8.64562	3.52	1.33787	3.52	4.00048
3.6	4.43848	3.6	8.12733	3.6	1.27288	3.6	4.09346
3.68	5.5641	3.68	6.92959	3.68	1.18106	3.68	4.03539
3.76	5.57965	3.76	6.63625	3.76	1.31491	3.76	4.08135
3.84	6.86873	3.84	5.22747	3.84	0.96186	3.84	4.3708
3.92	7.40394	3.92	4.46532	3.92	0.9977	3.92	4.44111
4	8.00692	4	3.63397	4	0.91236	4	4.646
4.08	9.53549	4.08	1.73996	4.08	0.79903	4.08	4.83357
4.16	10.0588	4.16	0.86418	4.16	0.70404	4.16	5.09345
4.24	11.3408	4.24	0.69378	4.24	0.52391	4.24	5.45668
4.32	12.5169	4.32	2.3001	4.32	0.42567	4.32	5.75216
4.4	13.306	4.4	3.58864	4.4	0.26525	4.4	6.18555
4.48	15.2175	4.48	5.96947	4.48	0.18479	4.48	6.80268
4.56	15.9733	4.56	7.28573	4.56	0.60965	4.56	7.54453
4.64	17.5642	4.64	9.4324	4.64	0.86674	4.64	7.98057
4.72	19.2612	4.72	11.8768	4.72	1.76835	4.72	9.09625
4.8	20.3737	4.8	13.6941	4.8	1.89814	4.8	9.55001
4.88	22.506	4.88	16.5321	4.88	2.51131	4.88	10.3468
4.96	23.7314	4.96	18.7185	4.96	2.88525	4.96	10.9941
5.04	25.5163	5.04	21.4054	5.04	3.46766	5.04	11.7824
5.12	27.7278	5.12	24.5978	5.12	4.61392	5.12	13.0248
5.2	28.8541	5.2	26.8332	5.2	4.53592	5.2	13.1985
5.28	31.4929	5.28	30.4703	5.28	5.68471	5.28	14.3911
5.36	33.0376	5.36	33.2234	5.36	5.92525	5.36	14.7758
5.44	34.8695	5.44	36.1504	5.44	6.25913	5.44	15.2175
5.52	37.2774	5.52	39.6759	5.52	7.0696	5.52	15.9927
5.6	38.566	5.6	42.3069	5.6	7.68564	5.6	16.687
5.68	40.9951	5.68	45.7272	5.68	8.38896	5.68	17.3425
5.76	42.5711	5.76	48.6509	5.76	8.67984	5.76	17.5615
5.84	44.3079	5.84	51.5469	5.84	9.29429	5.84	18.1156
5.92	46.7794	5.92	55.1732	5.92	10.3099	5.92	18.9396
6	47.6579	6	57.2675	6	10.3724	6	18.9158
6.08	49.9947	6.08	60.7987	6.08	11.4217	6.08	19.6897
6.16	51.5155	6.16	63.5746	6.16	11.7901	6.16	19.8227
6.24	53.4448	6.24	66.7672	6.24	12.8402	6.24	20.5796
6.32	55.8088	6.32	70.3042	6.32	13.4496	6.32	20.9301
6.4	56.9633	6.4	72.8121	6.4	14.2775	6.4	21.4363
6.48	59.4809	6.48	76.5985	6.48	15.0415	6.48	21.8022
6.56	61.506	6.56	80.1521	6.56	15.859	6.56	22.3011
6.64	63.7554	6.64	83.9991	6.64	17.3535	6.64	23.4211
6.72	66.5043	6.72	88.1684	6.72	18.4329	6.72	24.1111
6.8	68.6381	6.8	91.9457	6.8	19.3638	6.8	24.7507
6.88	71.7596	6.88	96.6756	6.88	20.8093	6.88	25.791
6.96	74.5575	6.96	101.257	6.96	22.214	6.96	26.9398
7.04	77.2794	7.04	105.805	7.04	23.15	7.04	27.5994
7.12	80.9927	7.12	111.199	7.12	24.5386	7.12	28.8112
7.2	83.8333	7.2	116.026	7.2	26.1204	7.2	30.2484
7.28	87.1772	7.28	121.012	7.28	27.3278	7.28	31.3009
7.36	91.0393	7.36	126.726	7.36	28.5275	7.36	32.572
7.44	94.3132	7.44	131.914	7.44	29.7026	7.44	33.8767
7.52	98.4743	7.52	137.605	7.52	31.4299	7.52	35.6313
7.6	101.716	7.6	142.544	7.6	31.9048	7.6	36.2148
7.68	105.464	7.68	147.714	7.68	33.3962	7.68	37.7447
7.76	109.556	7.76	153.262	7.76	35.1291	7.76	39.3279
7.84	112.481	7.84	157.665	7.84	35.8957	7.84	39.9847
7.92	116.931	7.92	163.23	7.92	38.1233	7.92	41.8946
8	120.353	8	167.843	8	39.1665	8	42.7573
8.08	123.917	8.08	172.331	8.08	41.0481	8.08	44.5806
8.16	127.738	8.16	177.037	8.16	41.6998	8.16	45.041
8.24	131.265	8.24	181.492	8.24	43.7113	8.24	46.9825
8.32	134.902	8.32	185.654	8.32	45.4615	8.32	48.5482
8.4	138.231	8.4	189.684	8.4	46.5151	8.4	49.4489
8.48	141.831	8.48	193.947	8.48	48.6157	8.48	51.3118
8.56	145.926	8.56	198.442	8.56	50.3586	8.56	52.7391
8.64	149.036	8.64	202.005	8.64	51.9079	8.64	54.1215
8.72	152.9	8.72	206.213	8.72	54.3778	8.72	56.2586
8.8	157.02	8.8	210.692	8.8	56.6013	8.8	58.3477
8.88	160.819	8.88	214.599	8.88	59.2701	8.88	60.8463
8.96	164.445	8.96	218.327	8.96	60.2564	8.96	61.8264
9.04	168.57	9.04	222.575	9.04	63.0822	9.04	64.6796
9.12	172.137	9.12	226.052	9.12	65.0563	9.12	66.5578
9.2	176.169	9.2	230.072	9.2	67.0914	9.2	68.6006
9.28	179.662	9.28	233.504	9.28	68.3721	9.28	70.0037
9.36	183.62	9.36	237.118	9.36	71.9432	9.36	73.3336
9.44	187.277	9.44	240.58	9.44	73.0271	9.44	74.5341
9.52	190.415	9.52	243.325	9.52	74.3209	9.52	75.728
9.6	194.29	9.6	246.75	9.6	76.2578	9.6	77.4016
9.68	197.245	9.68	249.349	9.68	77.8501	9.68	78.7522
9.76	200.31	9.76	251.631	9.76	79.1319	9.76	79.7581
9.84	203.447	9.84	254.244	9.84	79.9937	9.84	80.2951
9.92	205.842	9.92	255.803	9.92	81.7566	9.92	81.6965
10	208.736	10	258.088	10	82.7434	10	82.1899
10.08	210.854	10.08	259.674	10.08	82.8266	10.08	82.0462
10.16	212.928	10.16	261.02	10.16	85.6304	10.16	84.2657
10.24	213.973	10.24	261.756	10.24	84.6982	10.24	83.2371
10.32	214.743	10.32	262.327	10.32	86.7312	10.32	84.9503
10.4	214.714	10.4	262.295	10.4	87.028	10.4	84.9927
10.48	213.275	10.48	261.446	10.48	88.9961	10.48	87.0301
10.56	210.558	10.56	259.713	10.56	90.3362	10.56	88.1852
10.64	206.061	10.64	256.65	10.64	90.6546	10.64	88.674
10.72	200.092	10.72	252.009	10.72	93.8997	10.72	92.1994
10.8	192.285	10.8	245.347	10.8	93.6783	10.8	92.779
10.88	183.186	10.88	236.754	10.88	96.1791	10.88	97.0597
10.96	174.148	10.96	227.67	10.96	98.3198	10.96	100.581
11.04	165.846	11.04	221.245	11.04	101.596	11.04	95.3937
11.12	157.733	11.12	216.387	11.12	100.837	11.12	94.7448
11.2	152.27	11.2	204.574	11.2	98.1585	11.2	94.1108
11.28	148.376	11.28	192.848	11.28	101.958	11.28	97.8015
11.36	145.322	11.36	185.35	11.36	101.733	11.36	97.1405
11.44	143.948	11.44	181.85	11.44	102.708	11.44	97.9605
11.52	142.913	11.52	180.279	11.52	105.085	11.52	100.072
11.6	143.365	11.6	180.529	11.6	106.612	11.6	101.625
11.68	143.571	11.68	181.432	11.68	107.848	11.68	102.549
11.76	143.725	11.76	182.291	11.76	108.285	11.76	102.714
11.84	145.324	11.84	184.423	11.84	112.167	11.84	106.65
11.92	145.482	11.92	185.195	11.92	110.732	11.92	104.926
12	146.455	12	186.194	12	112.703	12	106.63
12.08	146.953	12.08	187.075	12.08	114.624	12.08	108.867
12.16	146.603	12.16	186.559	12.16	114.618	12.16	108.374
12.24	147.266	12.24	186.727	12.24	114.877	12.24	108.81
12.32	146.741	12.32	185.7	12.32	115.178	12.32	108.654
12.4	146.163	12.4	184.499	12.4	116.337	12.4	110.048
12.48	145.691	12.48	183.314	12.48	114.924	12.48	108.441
12.56	144.314	12.56	181.084	12.56	115.48	12.56	108.684
12.64	143.616	12.64	179.419	12.64	116.061	12.64	109.305
12.72	142.254	12.72	176.972	12.72	113.864	12.72	106.848
12.8	140.964	12.8	174.442	12.8	115.154	12.8	108.116
12.88	139.383	12.88	171.798	12.88	113.551	12.88	106.388
12.96	137.812	12.96	168.901	12.96	112.962	12.96	105.962
13.04	136.423	13.04	166.015	13.04	112.048	13.04	104.967
13.12	134.966	13.12	163.064	13.12	111.224	13.12	104.13
13.2	132.822	13.2	159.492	13.2	110.452	13.2	103.356
13.28	131.274	13.28	156.471	13.28	107.345	13.28	100.199
13.36	129.799	13.36	153.721	13.36	107.858	13.36	100.823
13.44	128.462	13.44	150.814	13.44	106.819	13.44	100.005
13.52	127.063	13.52	147.774	13.52	104.939	13.52	98.2432
13.6	125.058	13.6	144.14	13.6	104.479	13.6	97.8597
13.68	123.583	13.68	141.001	13.68	102.915	13.68	96.1953
13.76	121.53	13.76	137.738	13.76	101.464	13.76	95.1004
13.84	119.847	13.84	134.202	13.84	99.462	13.84	93.2341
13.92	118.402	13.92	131.373	13.92	98.364	13.92	92.0482
14	116.525	14	127.848	14	97.1315	14	91.0196
14.08	115.245	14.08	124.953	14.08	94.9141	14.08	89.1713
14.16	113.344	14.16	122.141	14.16	93.9657	14.16	87.8424
14.24	111.489	14.24	118.34	14.24	91.3519	14.24	85.5376
14.32	110.251	14.32	115.558	14.32	89.8511	14.32	83.8646
14.4	108.249	14.4	112.025	14.4	87.6561	14.4	81.9455
14.48	106.79	14.48	108.913	14.48	85.9621	14.48	80.1013
14.56	105.173	14.56	106.165	14.56	84.4882	14.56	78.6253
14.64	103.766	14.64	103.339	14.64	82.5113	14.64	76.7031
14.72	102.965	14.72	100.88	14.72	81.7719	14.72	76.2963
14.8	100.298	14.8	97.023	14.8	78.2925	14.8	72.9115
14.88	98.5547	14.88	93.6428	14.88	74.7713	14.88	69.3095
14.96	97.3845	14.96	91.1226	14.96	74.4634	14.96	69.0262
15.04	95.1323	15.04	87.7559	15.04	71.9902	15.04	66.8635
15.12	94.0083	15.12	85.0602	15.12	70.468	15.12	65.2515
15.2	91.7107	15.2	81.7624	15.2	68.5137	15.2	63.4239
15.28	90.3978	15.28	78.9315	15.28	67.6377	15.28	62.5872
15.36	89.0114	15.36	76.523	15.36	66.4838	15.36	61.4201
15.44	86.8254	15.44	73.4006	15.44	63.3945	15.44	58.3858
15.52	85.5778	15.52	70.9358	15.52	63.5474	15.52	58.4863
15.6	83.8796	15.6	68.591	15.6	61.2052	15.6	56.5245
15.68	82.07	15.68	65.8483	15.68	58.9506	15.68	54.3706
15.76	80.5386	15.76	63.7858	15.76	57.4742	15.76	52.9166
15.84	78.9297	15.84	61.6433	15.84	56.0242	15.84	51.7007
15.92	78.1722	15.92	60.1729	15.92	54.0915	15.92	49.7648
16	76.6639	16	57.9981	16	51.4299	16	47.5245
16.08	75.4627	16.08	56.3145	16.08	50.1081	16.08	46.1748
16.16	74.9271	16.16	55.3152	16.16	49.2523	16.16	45.3828
16.24	74.3792	16.24	54.2792	16.24	45.5058	16.24	42.0063
16.32	73.7198	16.32	52.3898	16.32	44.3257	16.32	40.9787
16.4	72.9745	16.4	51.0089	16.4	41.9737	16.4	39.1267
16.48	73.2649	16.48	50.137	16.48	40.4155	16.48	37.6402
16.56	73.4611	16.56	49.1161	16.56	37.6731	16.56	35.1628
16.64	73.447	16.64	47.8266	16.64	35.7583	16.64	33.6263
16.72	73.5873	16.72	46.1317	16.72	34.6531	16.72	32.5998
16.8	73.5845	16.8	44.817	16.8	32.2408	16.8	30.478
16.88	73.7621	16.88	43.3617	16.88	30.339	16.88	28.7808
16.96	73.783	16.96	41.4347	16.96	29.6259	16.96	28.1847
17.04	73.2917	17.04	39.7375	17.04	26.6106	17.04	25.4928
17.12	72.9713	17.12	37.8913	17.12	25.7736	17.12	24.5893
17.2	72.2892	17.2	36.1849	17.2	24.5696	17.2	23.5736
17.28	71.3519	17.28	34.2569	17.28	23.0427	17.28	22.4539
17.36	70.2985	17.36	32.316	17.36	21.8377	17.36	21.1124
17.44	68.7004	17.44	30.3404	17.44	20.6688	17.44	20.4326
17.52	67.5813	17.52	28.4114	17.52	20.1096	17.52	20.1732
17.6	66.2334	17.6	27.1621	17.6	18.8608	17.6	18.7362
17.68	64.3495	17.68	24.8056	17.68	17.3353	17.68	17.5563
17.76	63.8007	17.76	23.9515	17.76	17.9215	17.76	18.4156
17.84	62.4775	17.84	22.9695	17.84	16.1302	17.84	16.5798
17.92	61.5084	17.92	21.7393	17.92	14.9979	17.92	15.9485
18	61.0825	18	22.7947	18	15.5352	18	16.6503
